# Supplementary material
Source: PubMed Central journal article supplement (PMC7343995)

**a)** PCoA of Weighted UniFrac Distances for NAG Stress Modules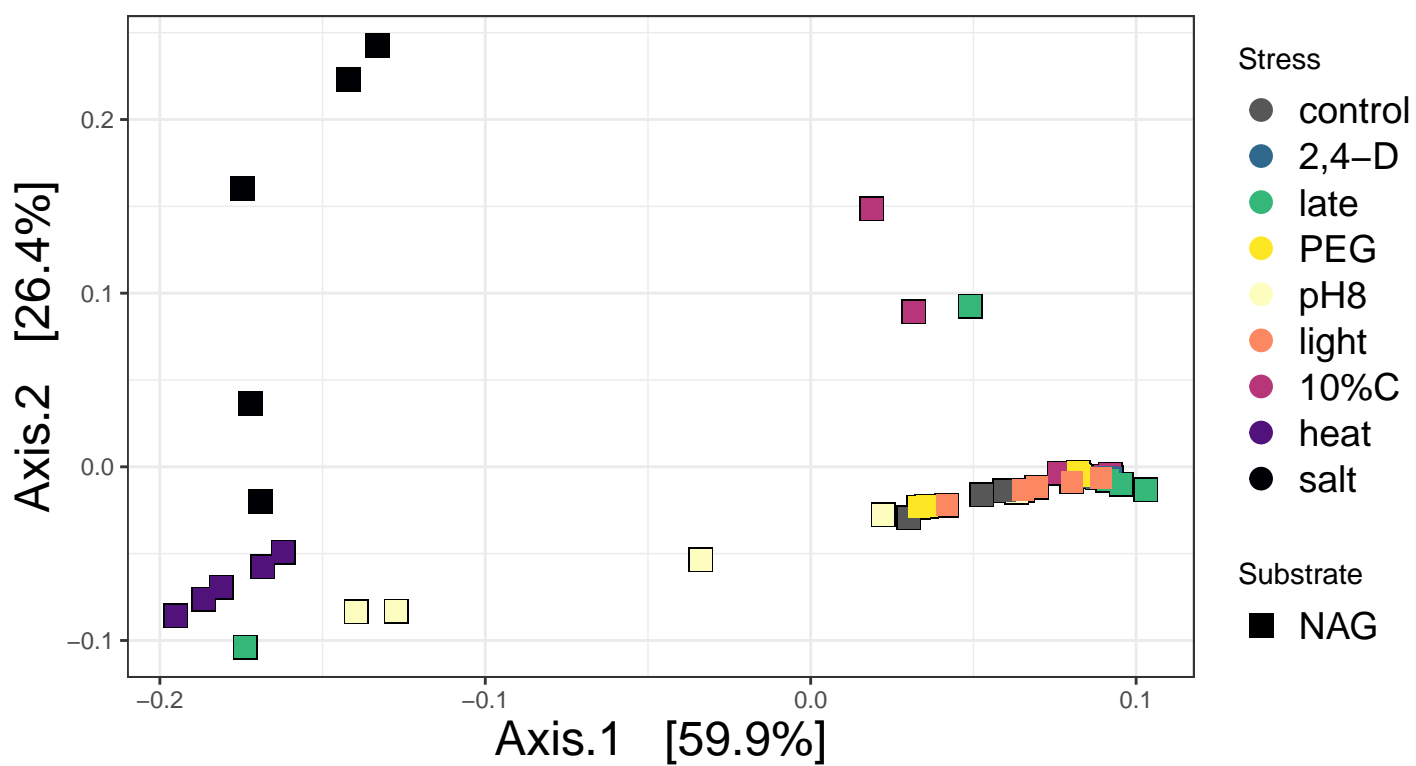**b)** PCoA of Unweighted UniFrac Distances for NAG Stress Modules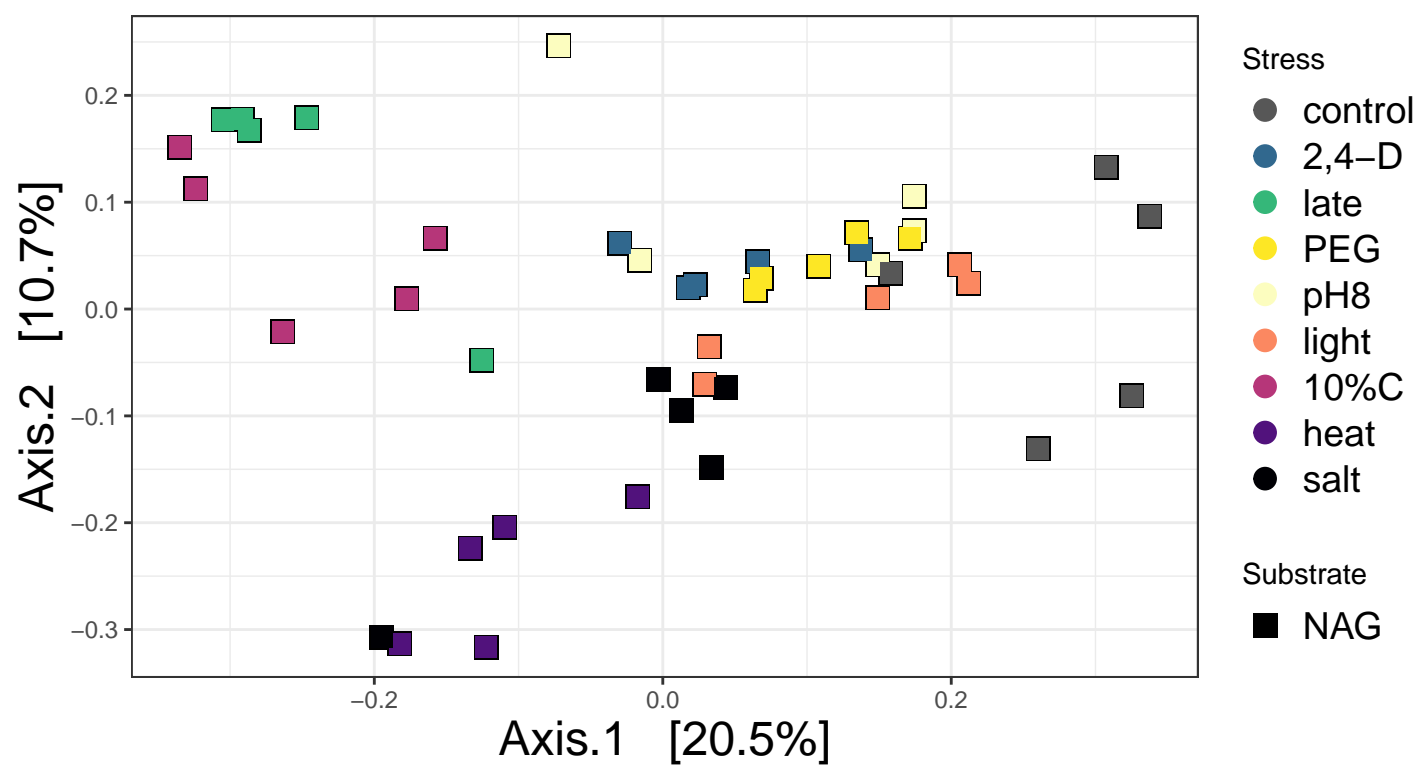**c)** PCoA of Weighted UniFrac Distances for Xylose Stress Modules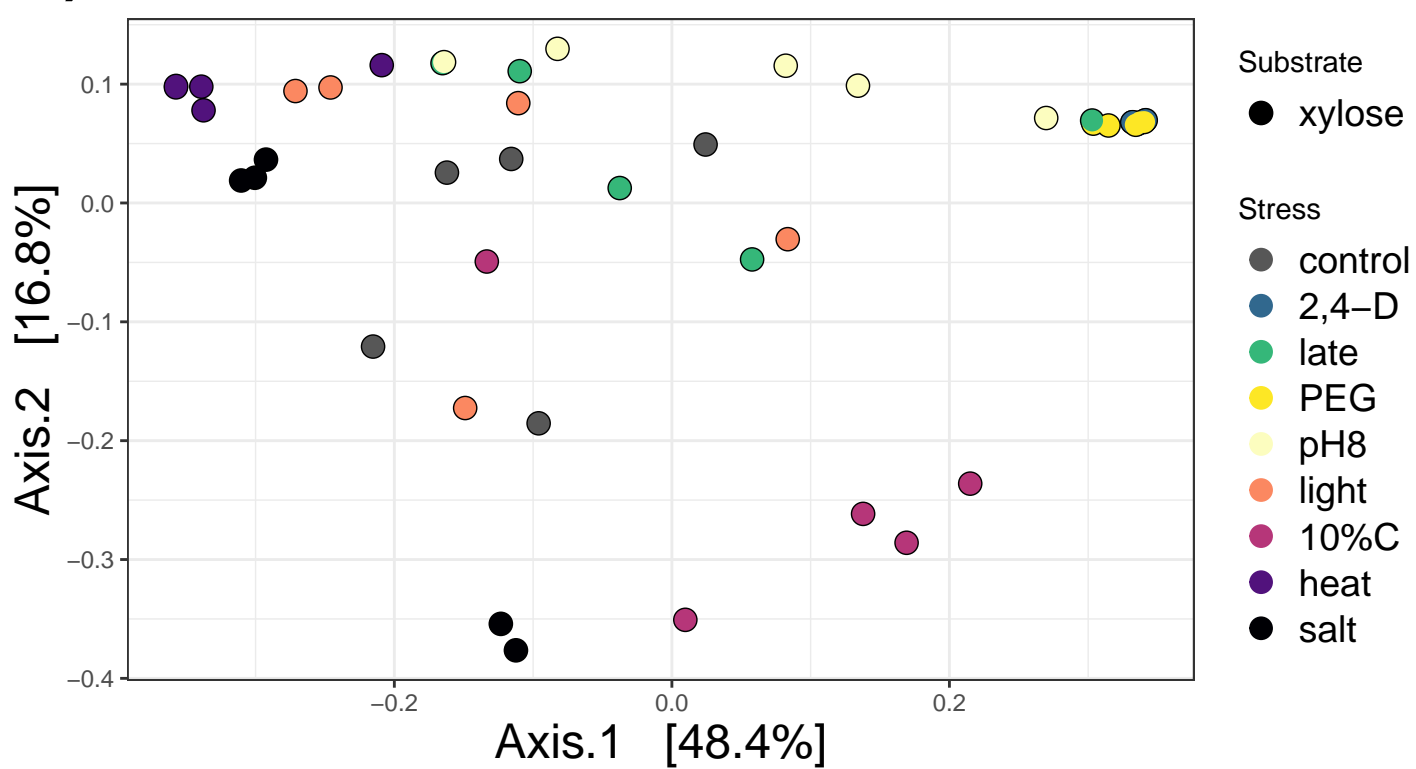**d)** PCoA of Unweighted UniFrac Distances for Xylose Stress Modules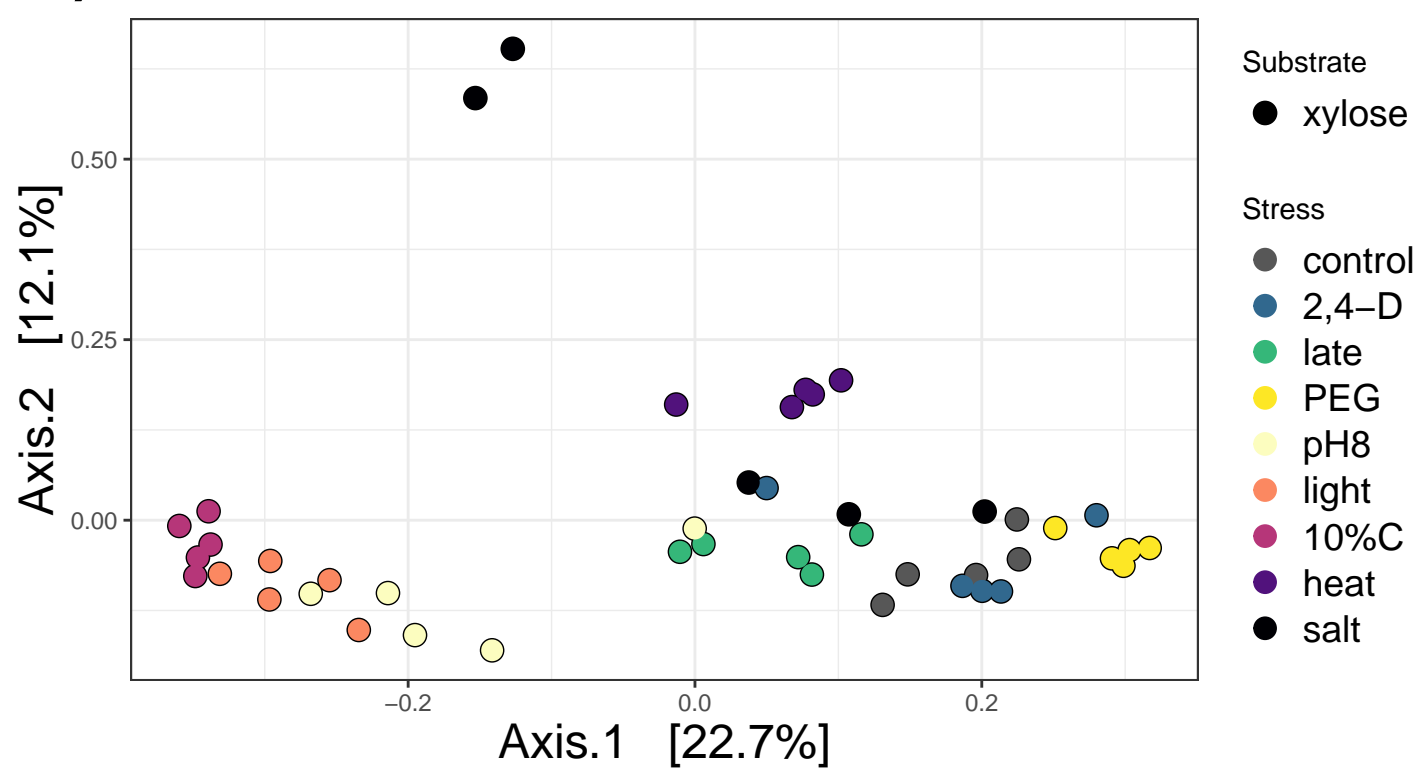**e)** PCoA of Weighted UniFrac Distances for Xylan Stress Modules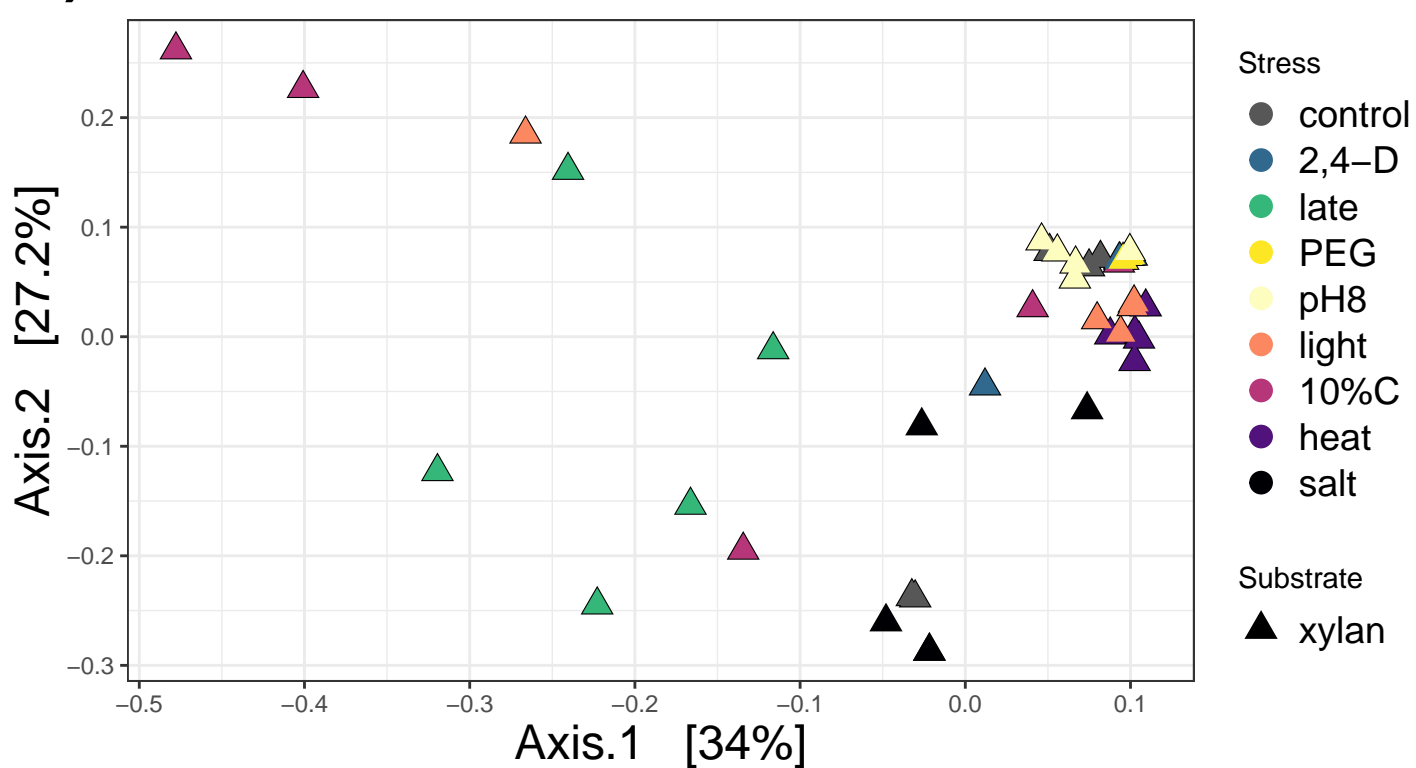**f)** PCoA of Unweighted UniFrac Distances for Xylan Stress Modules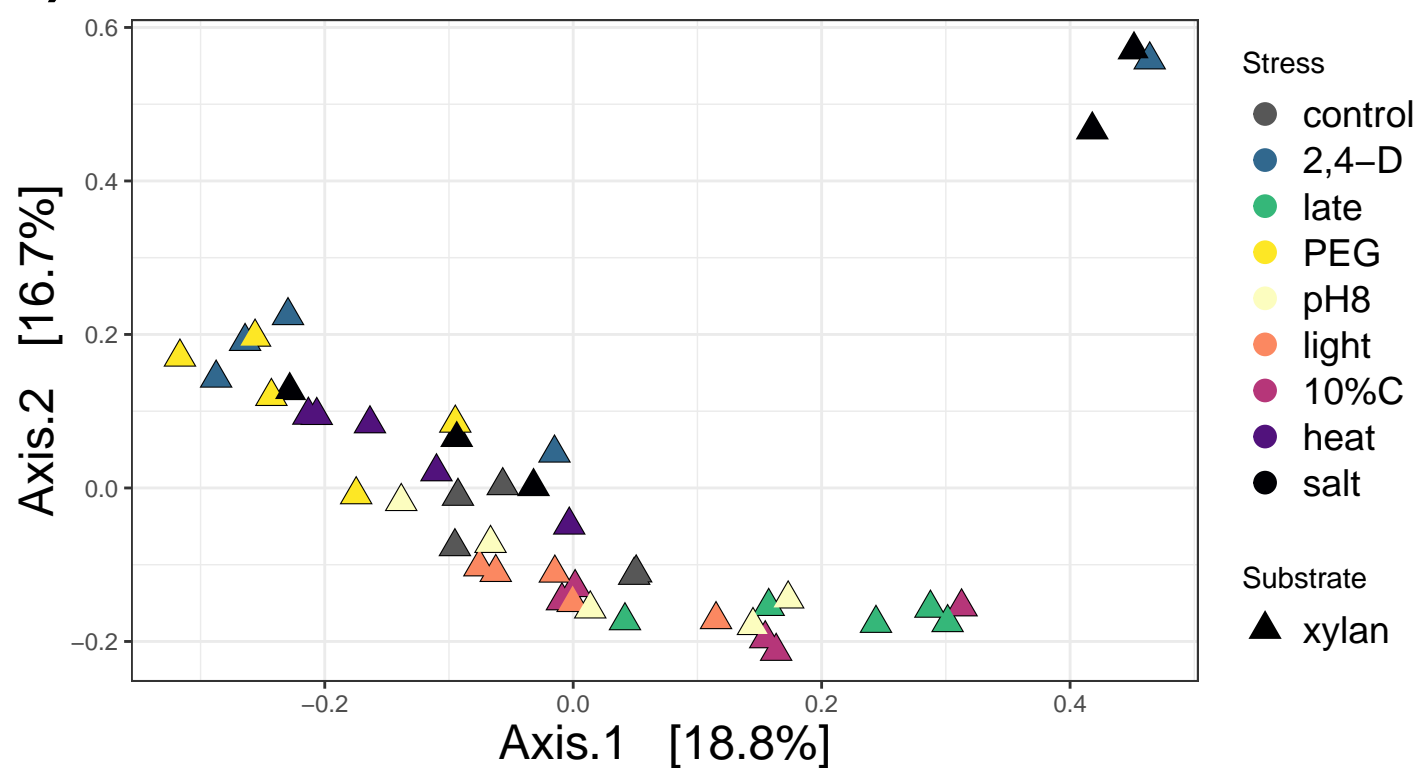

Supplement: mBio.01349-20-sf001.pdf [file mBio.01349-20-sf001.pdf]
