# Supplementary material
Source: PubMed Central journal article supplement (PMC7343995)
Supplement: mBio.01349-20-st001.pdf [file mBio.01349-20-st001.pdf]

**Supplemental Table 1. PERMANOVA of Weighted and Unweighted UniFrac Distances for full dataset and stress dataset.** In full dataset (excluding native soil controls), PERMANOVA analyses were run to determine the significance of factors 'Category' and 'Replicate', and 'ModuleName' and 'Replicate' (note: these analyses were run separately due to the interdependence of 'Category' and 'ModuleName'), in explaining variation in beta-diversity (Weighted and Unweighted UniFrac distances). In stress dataset, analyses were run to determine the significance of 'Stress', 'Substrate', 'Replicate', and the interaction term 'Stress:Substrate', or 'ModuleName' and 'Replicate' (again, analyses were run separately due to interdependence). Analyses were run using the 'adonis' function within the 'vegan' package in R.

**Full Dataset - Weighted UniFrac**

| Category  |                    |                |              |             |            |           |
|-----------|--------------------|----------------|--------------|-------------|------------|-----------|
| Factor    | Degrees of Freedom | Sum of Squares | Mean Squares | F Statistic | R2         | Pr(>F)    |
| Category  | 5                  | 2.9932309      | 0.59864617   | 14.19904    | 0.18233    | 0.001 *** |
| Replicate | 9                  | 0.3959154      | 0.0439906    | 1.043395    | 0.02411633 | 0.4       |
| Residuals | 309                | 13.0277587     | 0.04216103   |             | 0.79355754 |           |
| Total     | 323                | 16.416905      |              |             | 1.00000    |           |

**ModuleName**

| Factor     | Degrees of Freedom | Sum of Squares | Mean Squares | F Statistic | R2         | Pr(>F)    |
|------------|--------------------|----------------|--------------|-------------|------------|-----------|
| ModuleName | 65                 | 11.3891171     | 0.17521719   | 9.208341    | 0.69374    | 0.001 *** |
| Replicate  | 9                  | 0.2897922      | 0.03219913   | 1.692189    | 0.01765206 | 0.012 *   |
| Residuals  | 249                | 4.7379957      | 0.0190281    |             | 0.28860468 |           |
| Total      | 323                | 16.416905      |              |             | 1.00000    |           |

**Stress Dataset - Weighted UniFrac**

| Factor           | Degrees of Freedom | Sums of Squares | Mean Squares | F Statistic | R2         | Pr(>F)    |
|------------------|--------------------|-----------------|--------------|-------------|------------|-----------|
| Stress           | 8                  | 5.898029        | 0.73725363   | 18.259761   | 0.43130985 | 0.001 *** |
| Substrate        | 2                  | 0.9027817       | 0.45139085   | 11.17972    | 0.06601843 | 0.001 *** |
| Replicate        | 6                  | 0.4498698       | 0.07497829   | 1.857008    | 0.03289798 | 0.018 *   |
| Stress:Substrate | 16                 | 2.3056727       | 0.14410454   | 3.569076    | 0.16860875 | 0.001 *** |
| Residuals        | 102                | 4.1183382       | 0.04037586   |             | 0.30116498 |           |
| Total            | 134                | 13.6746913      |              |             | 1          |           |

| Factor     | Degrees of Freedom | Sums of Squares | Mean Squares | F Statistic | R2        | Pr(>F)    |
|------------|--------------------|-----------------|--------------|-------------|-----------|-----------|
| ModuleName | 26                 | 9.1362106       | 0.35139271   | 8.703039    | 0.6681109 | 0.001 *** |
| Replicate  | 6                  | 0.4201425       | 0.07002376   | 1.734297    | 0.0307241 | 0.022 *   |
| Residuals  | 102                | 4.1183382       | 0.04037586   |             | 0.301165  |           |
| Total      | 134                | 13.6746913      |              |             | 1         |           |

**Full Dataset - Unweighted UniFrac**

| Category  |                    |                |              |             |            |           |
|-----------|--------------------|----------------|--------------|-------------|------------|-----------|
| Factor    | Degrees of Freedom | Sum of Squares | Mean Squares | F Statistic | R2         | Pr(>F)    |
| Category  | 5                  | 7.015877       | 1.4031755    | 6.3235531   | 0.09051    | 0.001 *** |
| Replicate | 9                  | 1.934665       | 0.2149628    | 0.9687519   | 0.02495807 | 0.594     |
| Residuals | 309                | 68.566076      | 0.2218967    |             | 0.88453388 |           |
| Total     | 323                | 77.516619      |              |             | 1.00000    |           |

**ModuleName**

| Factor     | Degrees of Freedom | Sum of Squares | Mean Squares | F Statistic | R2        | Pr(>F)    |
|------------|--------------------|----------------|--------------|-------------|-----------|-----------|
| ModuleName | 65                 | 36.032714      | 0.5543494    | 3.486361    | 0.4648386 | 0.001 *** |
| Replicate  | 9                  | 1.891615       | 0.2101795    | 1.32184     | 0.0244027 | 0.008 **  |
| Residuals  | 249                | 39.59229       | 0.1590052    |             | 0.5107587 |           |
| Total      | 323                | 77.516619      |              |             | 1         |           |

**Stress Dataset - Unweighted UniFrac**

| Factor           | Degrees of Freedom | Sums of Squares | Mean Squares | F Statistic | R2         | Pr(>F)    |
|------------------|--------------------|-----------------|--------------|-------------|------------|-----------|
| Stress           | 8                  | 7.247521        | 0.9059401    | 6.848936    | 0.26416231 | 0.001 *** |
| Substrate        | 2                  | 1.045564        | 0.522782     | 3.952249    | 0.0381094  | 0.001 *** |
| Replicate        | 6                  | 1.03011         | 0.1716851    | 1.297945    | 0.03754613 | 0.05 *    |
| Stress:Substrate | 16                 | 4.620661        | 0.2887913    | 2.183271    | 0.16841682 | 0.001 *** |
| Residuals        | 102                | 13.492006       | 0.1322746    |             | 0.49176534 |           |
| Total            | 134                | 27.435861       |              |             | 1          |           |

| Factor     | Degrees of Freedom | Sums of Squares | Mean Squares | F Statistic | R2         | Pr(>F)    |
|------------|--------------------|-----------------|--------------|-------------|------------|-----------|
| ModuleName | 26                 | 12.9539636      | 0.4982294    | 3.76663     | 0.47215444 | 0.001 *** |
| Replicate  | 6                  | 0.9898921       | 0.164982     | 1.247269    | 0.03608023 | 0.087 .   |
| Residuals  | 102                | 13.4920056      | 0.1322746    |             | 0.49176534 |           |
| Total      | 134                | 27.4358612      |              |             | 1          |           |
