# Supplementary material
Source: PubMed Central journal article supplement (PMC7343995)
Supplement: mBio.01349-20-st004.pdf [file mBio.01349-20-st004.pdf]

**Supplemental Table 4.** Indicator species analysis (set to "genus" level) for full dataset. Analysis was conducted using the "indval" function within the "labdiv" package in R using default parameters. Data generated includes "indval" (indicator value; this value is a product of incidence and frequency) and "p-value" (significance of the aforementioned indicator value, and "freq" (relative frequency of the taxon across all replicates for a model). Only indicator genera with p-value less than 0.05 were retained.

| Module Name              | indval | p-value    | freq  | Domain   | Phylum           | Class               | Order               | Family                 | Genus                       |
|--------------------------|--------|------------|-------|----------|------------------|---------------------|---------------------|------------------------|-----------------------------|
| 10nC_yilan               | 7      | 0.2859242  | 0.009 | Bacteria | Proteobacteria   | Beta                | Bacteroidia         | Burkholderiales        | Alphaproteobacteria         |
| 10nC_yilosu              | 4      | 0.0484845  | 0.002 | Bacteria | Proteobacteria   | Alphaproteobacteria | Rhizobiales         | Rhizobiales            | Aurimonomadaceae            |
| 10nC_yilosu              | 13     | 0.1371139  | 0.001 | Bacteria | Proteobacteria   | Alphaproteobacteria | Rhizobiales         | Rhizobiales            | Enfiter                     |
| 10nC_yilosu              | 3      | 0.0438206  | 0.002 | Bacteria | Proteobacteria   | Alphaproteobacteria | Rhizobiales         | Rhizobiales            | ?                           |
| 10nC_yilosu              | 13     | 0.1450804  | 0.001 | Bacteria | Proteobacteria   | Alphaproteobacteria | Rhizobiales         | Rhizobiales            | ?                           |
| 10nC_yilosu              | 3      | 0.2989011  | 0.001 | Bacteria | Proteobacteria   | Alphaproteobacteria | Rhizobiales         | Rhizobiales            | Phyllobacteriaceae          |
| 2_4_0_yilan              | 6      | 0.1293484  | 0.038 | Bacteria | Proteobacteria   | Alphaproteobacteria | Rhizobiales         | Rhizobiales            | Glucosacetobacter           |
| cellulose                | 11     | 0.1454455  | 0.001 | Bacteria | Proteobacteria   | Alphaproteobacteria | Rhizobiales         | Rhizobiales            | Phyllobacteriaceae          |
| cellulose                | 13     | 0.1505     | 0.005 | Bacteria | Proteobacteria   | Alphaproteobacteria | Rhizobiales         | Rhizobiales            | Kaista                      |
| cellulose                | 11     | 0.1702128  | 0.001 | Bacteria | Proteobacteria   | Alphaproteobacteria | Rhizobiales         | Rhizobiales            | Rhizobiales                 |
| cellulose                | 13     | 0.1426804  | 0.001 | Bacteria | Proteobacteria   | Alphaproteobacteria | Rhizobiales         | Rhizobiales            | Agromyces                   |
| cellulose                | 13     | 0.1964233  | 0.012 | Bacteria | Firmicutes       | Clostridia          | Clostridiales       | Ruminococcales         | Ruminococcaceae             |
| cellulose                | 13     | 0.1515161  | 0.001 | Bacteria | Proteobacteria   | Alphaproteobacteria | Rhizobiales         | Rhizobiales            | Depressa                    |
| cellulose                | 13     | 0.2666667  | 0.031 | Bacteria | Chloroflexi      | Ktedonobacteria     | Rhodospirillales    | Rhodospirillales       | H8_DFS_F07                  |
| cellulose                | 13     | 0.1413793  | 0.009 | Bacteria | Proteobacteria   | Alphaproteobacteria | Rhizobiales         | Rhizobiales            | Incerta                     |
| cellulose                | 13     | 0.2774688  | 0.014 | Bacteria | Proteobacteria   | Alphaproteobacteria | Rhizobiales         | Rhizobiales            | Springomonas                |
| cellulose                | 13     | 0.1259894  | 0.031 | Bacteria | Proteobacteria   | Alphaproteobacteria | Rhizobiales         | Rhizobiales            | Incertae                    |
| cellulose                | 14     | 0.1774959  | 0.039 | Bacteria | Proteobacteria   | Alphaproteobacteria | Rhizobiales         | Rhizobiales            | Bradyrhizobium              |
| chitin                   | 14     | 0.2816     | 0.024 | Bacteria | Proteobacteria   | Alphaproteobacteria | Rhizobiales         | Rhizobiales            | Stemella                    |
| chitin                   | 14     | 0.1867429  | 0.041 | Bacteria | Bacteroidetes    | Chloroflexi         | Chloroflexiales     | Chloroflexiales        | Chloroflexus                |
| chitin                   | 14     | 0.2816     | 0.024 | Bacteria | Firmicutes       | Clostridia          | Clostridiales       | Clostridiales          | Clostridium_sensu_stricto_1 |
| gentamycin               | 22     | 0.1748549  | 0.001 | Bacteria | Firmicutes       | Clostridia          | Clostridiales       | Clostridiales          | Clostridium_sensu_stricto_8 |
| gentamycin               | 22     | 0.1814147  | 0.001 | Bacteria | Proteobacteria   | Gamma               | Proteobacteria      | Xanthomonadales        | Stenotrophomonas            |
| gentamycin               | 22     | 0.1666233  | 0.001 | Bacteria | Proteobacteria   | Beta                | Bacteroidia         | Bacteroidiales         | Comamonadaceae              |
| glycerol                 | 26     | 0.2083133  | 0.028 | Bacteria | Proteobacteria   | Beta                | Bacteroidia         | Rhodocyclales          | Rhodocyclales               |
| heat_n_acetylglucosamine | 28     | 0.2084516  | 0.001 | Bacteria | Firmicutes       | Negativicutes       | Selenomonadales     | Selenomonadales        | Propionispora               |
| heat_n_acetylglucosamine | 28     | 0.1471886  | 0.002 | Bacteria | Firmicutes       | Bacilli             | Bacillales          | Bacillales             | Nocardaceae                 |
| heat_n_acetylglucosamine | 28     | 0.1305176  | 0.002 | Bacteria | Firmicutes       | Bacilli             | Bacillales          | Bacillales             | Paenibacillaceae            |
| heat_n_acetylglucosamine | 28     | 0.2083133  | 0.001 | Bacteria | Firmicutes       | Bacilli             | Bacillales          | Bacillales             | Anemobacillus               |
| heat_n_acetylglucosamine | 28     | 0.4333079  | 0.001 | Bacteria | Firmicutes       | Bacilli             | Bacillales          | Bacillales             | ?                           |
| heat_n_acetylglucosamine | 28     | 0.1813935  | 0.015 | Bacteria | Firmicutes       | Negativicutes       | Selenomonadales     | Selenomonadales        | Venombacillus               |
| heat_n_acetylglucosamine | 28     | 0.2496503  | 0.048 | Bacteria | Firmicutes       | Negativicutes       | Selenomonadales     | Selenomonadales        | Brummbacillus               |
| heat_yilan               | 29     | 0.1750784  | 0.001 | Bacteria | Proteobacteria   | Beta                | Bacteroidia         | Burkholderiales        | Cupriavidus                 |
| heat_yilan               | 29     | 0.2794242  | 0.009 | Bacteria | Firmicutes       | Bacilli             | Bacillales          | Bacillales             | Paenibacillaceae            |
| heat_yilan               | 29     | 0.1401254  | 0.04  | Bacteria | Firmicutes       | Clostridia          | Clostridiales       | Clostridiales          | Clostridium_sensu_stricto_3 |
| heat_yilosu              | 30     | 0.0892366  | 0.004 | Bacteria | Firmicutes       | Bacilli             | Bacillales          | Bacillales             | Paenibacillaceae            |
| late_yilan               | 33     | 0.192      | 0.006 | Bacteria | Bacteroidetes    | Sphingobacterii     | Sphingobacteriales  | Sphingobacteriales     | Paudobacter                 |
| late_yilan               | 33     | 0.192      | 0.006 | Bacteria | Proteobacteria   | Alphaproteobacteria | Rhizobiales         | Rhizobiales            | Methylbacterium             |
| lign_yilosu              | 37     | 0.1489942  | 0.001 | Bacteria | Actinobacteria   | Actinobacteria      | Actinobacteriales   | Nocardiales            | Rhododoccus                 |
| pH6_n_acetylglucosamine  | 48     | 0.1629791  | 0.005 | Bacteria | Proteobacteria   | Alphaproteobacteria | Rhizobiales         | Rhizobiales            | Leucobacter                 |
| pH6_n_acetylglucosamine  | 48     | 0.1333133  | 0.011 | Bacteria | Proteobacteria   | Gamma               | Proteobacteria      | Xanthomonadales        | Leucobacter                 |
| pH6_yilan                | 51     | 0.1779270  | 0.003 | Bacteria | Proteobacteria   | Alphaproteobacteria | Rhizobiales         | Rhizobiales            | Rhizobium                   |
| pH6_yilosu               | 52     | 0.25       | 0.002 | Bacteria | Proteobacteria   | Alphaproteobacteria | Rhizobiales         | Rhizobiales            | Rhizobium                   |
| potassiumnitrate         | 53     | 0.1601919  | 0.001 | Bacteria | Firmicutes       | Clostridia          | Clostridiales       | Clostridiales          | Clostridium_sensu_stricto_1 |
| potassiumnitrate         | 53     | 0.1788929  | 0.001 | Bacteria | Firmicutes       | Clostridia          | Clostridiales       | Clostridiales          | Clostridium_sensu_stricto_1 |
| potassiumnitrate         | 53     | 0.2907108  | 0.015 | Bacteria | Firmicutes       | Clostridia          | Clostridiales       | Clostridiales          | Clostridium_sensu_stricto_6 |
| salt_glucose             | 57     | 0.1650549  | 0.001 | Bacteria | Firmicutes       | Bacilli             | Bacillales          | Bacillales             | Terribacillus               |
| salt_glucose             | 57     | 0.2222825  | 0.001 | Bacteria | Firmicutes       | Bacilli             | Bacillales          | Bacillales             | Bacillus                    |
| salt_glucose             | 57     | 0.2666667  | 0.037 | Bacteria | Verrucomicrobia  | Spartobacteria      | Chthoniobacteriales | Chthoniobacteriales    | ?                           |
| salt_n_acetylglucosamine | 58     | 0.1577707  | 0.001 | Bacteria | Firmicutes       | Bacilli             | Bacillales          | Bacillales             | ?                           |
| salt_n_acetylglucosamine | 58     | 0.1478469  | 0.001 | Bacteria | Actinobacteria   | Actinobacteria      | Actinobacteriales   | Actinobacteriales      | Paeniglutamicibacter        |
| salt_yilan               | 59     | 0.1777727  | 0.001 | Bacteria | Actinobacteria   | Actinobacteria      | Actinobacteriales   | Promicromonosporae     | ?                           |
| salt_yilan               | 59     | 0.2030486  | 0.001 | Bacteria | Actinobacteria   | Actinobacteria      | Actinobacteriales   | Actinobacteriales      | Demingia                    |
| salt_yilan               | 59     | 0.4        | 0.017 | Bacteria | Proteobacteria   | Alphaproteobacteria | Rhizobiales         | Rhizobiales            | Acetobacter                 |
| salt_yilan               | 59     | 0.4        | 0.014 | Bacteria | Proteobacteria   | Gamma               | Proteobacteria      | Aeromonadales          | Aeromonas                   |
| salt_yilan               | 59     | 0.1822824  | 0.012 | Bacteria | Flammonetes      | Flammonetata        | Flammonetatales     | Flammonetatales        | Actinella                   |
| salt_yilan               | 59     | 0.1971164  | 0.01  | Bacteria | Actinobacteria   | Actinobacteria      | Actinobacteriales   | Microbacteriales       | Leucobacter                 |
| salt_yilan               | 59     | 0.1428714  | 0.042 | Bacteria | Proteobacteria   | Gamma               | Proteobacteria      | Norwalkiaceae          | Actinobacter                |
| salt_yilan               | 59     | 0.1333133  | 0.011 | Bacteria | Actinobacteria   | Actinobacteria      | Actinobacteriales   | Actinobacteriales      | ?                           |
| salt_yilan               | 59     | 0.2871429  | 0.02  | Bacteria | Proteobacteria   | Gamma               | Proteobacteria      | Nocardiales            | Thermus                     |
| salt_yilan               | 59     | 0.2378294  | 0.02  | Bacteria | Deinococcus      | Deinococcus         | Thermales           | Thermales              | Thermus                     |
| salt_yilan               | 59     | 0.25       | 0.014 | Bacteria | Proteobacteria   | Alphaproteobacteria | Sphingomonadales    | Sphingomonadales       | Novosphingobium             |
| salt_yilan               | 59     | 0.2469043  | 0.001 | Bacteria | Actinobacteria   | Actinobacteria      | Actinobacteriales   | Micrococcales          | ?                           |
| salt_yilan               | 59     | 0.24       | 0.017 | Bacteria | Chloroflexi      | Chloroflexi         | Saltedinales        | SAW175                 | ?                           |
| salt_yilan               | 59     | 0.2287143  | 0.042 | Bacteria | Bacteroidetes    | Sphingobacterii     | Sphingobacteriales  | AYH767                 | ?                           |
| salt_yilan               | 59     | 0.2129624  | 0.025 | Bacteria | Actinobacteria   | Actinobacteria      | Actinobacteriales   | Actinobacteriales      | Arthrobracter               |
| salt_yilan               | 59     | 0.2159797  | 0.04  | Bacteria | Actinobacteria   | Actinobacteria      | Actinobacteriales   | Actinobacteriales      | ?                           |
| salt_yilan               | 59     | 0.1338462  | 0.016 | Bacteria | Firmicutes       | Bacilli             | Lactobacillales     | Streptococcales        | Lactococcus                 |
| salt_yilan               | 59     | 0.2152178  | 0.014 | Bacteria | Firmicutes       | Bacilli             | Bacillales          | Bacillales             | Geobacillus                 |
| salt_yilan               | 59     | 0.2        | 0.046 | Bacteria | Proteobacteria   | Delta               | Proteobacteria      | Mycobacteriales        | Bifidus                     |
| salt_yilan               | 59     | 0.2        | 0.022 | Bacteria | Ca               | Hydrophi            | ?                   | ?                      | ?                           |
| salt_yilan               | 59     | 0.2        | 0.03  | Bacteria | Actinobacteria   | Actinobacteria      | Actinobacteriales   | Actinobacteriales      | Sporothrix                  |
| salt_yilan               | 59     | 0.1846138  | 0.042 | Bacteria | Flammonetes      | Phycisphaerae       | Phycisphaerales     | Phycisphaerales        | SMLA02                      |
| salt_yilan               | 59     | 0.18       | 0.047 | Bacteria | Actinobacteria   | Actinobacteria      | Actinobacteriales   | Actinobacteriales      | Hydrosporangium             |
| salt_yilan               | 59     | 0.1995184  | 0.04  | Bacteria | Chloroflexi      | Chloroflexi         | Subdivisio          | ?                      | ?                           |
| salt_yilan               | 59     | 0.1738421  | 0.049 | Bacteria | Actinobacteria   | Actinobacteria      | Actinobacteriales   | Actinobacteriales      | Aeromicrobium               |
| salt_yilosu              | 60     | 0.1892077  | 0.044 | Bacteria | Actinobacteria   | Actinobacteria      | Actinobacteriales   | Actinobacteriales      | Paudobacter                 |
| salt_yilosu              | 60     | 0.1754262  | 0.003 | Bacteria | Actinobacteria   | Actinobacteria      | Actinobacteriales   | Actinobacteriales      | ?                           |
| salt_yilosu              | 60     | 0.1972843  | 0.004 | Bacteria | Firmicutes       | Bacilli             | Lactobacillales     | Comabacteriaceae       | Deinema                     |
| salt_yilosu              | 60     | 0.1137152  | 0.002 | Bacteria | Actinobacteria   | Actinobacteria      | Actinobacteriales   | Actinobacteriales      | Geogema                     |
| salt_yilosu              | 60     | 0.4        | 0.019 | Bacteria | Actinobacteria   | Actinobacteria      | Actinobacteriales   | Actinobacteriales      | ?                           |
| salt_yilosu              | 60     | 0.1864     | 0.002 | Bacteria | ?                | ?                   | ?                   | ?                      | ?                           |
| salt_yilosu              | 60     | 0.32       | 0.024 | Bacteria | Verrucomicrobia  | Spartobacteria      | Chthoniobacteriales | Sphingnetmataceae      | ?                           |
| salt_yilosu              | 60     | 0.2871429  | 0.026 | Archaea  | Euryarchaeota    | Thaumogammatina     | Marine_Group_1      | ?                      | ?                           |
| salt_yilosu              | 60     | 0.2328294  | 0.009 | Bacteria | Chloroflexi      | S055                | ?                   | ?                      | ?                           |
| salt_yilosu              | 60     | 0.2666667  | 0.033 | Bacteria | Gemmatimonadetes | Longimicrobiales    | ?                   | ?                      | ?                           |
| salt_yilosu              | 60     | 0.2666667  | 0.049 | Bacteria | Proteobacteria   | Alphaproteobacteria | Rhizobiales         | NMG7                   | ?                           |
| salt_yilosu              | 60     | 0.24       | 0.037 | Bacteria | Nitrospirillum   | Nitrospirillum      | ?                   | ?                      | ?                           |
| salt_yilosu              | 60     | 0.2311111  | 0.023 | Bacteria | Proteobacteria   | Alphaproteobacteria | Sphingomonadales    | ?                      | ?                           |
| salt_yilosu              | 60     | 0.16       | 0.046 | Bacteria | Proteobacteria   | Gamma               | Proteobacteria      | Comamonadales          | Agastella                   |
| salt_yilosu              | 60     | 0.1957118  | 0.001 | Bacteria | Proteobacteria   | Beta                | Bacteroidia         | Bacteroidiales         | Polaromonas                 |
| sol_extract              | 61     | 0.1929205  | 0.001 | Bacteria | Bacteroidetes    | Chloroflexi         | Bacteroidia         | Bacteroidiales         | ?                           |
| sol_extract              | 61     | 0.1883479  | 0.001 | Bacteria | Verrucomicrobia  | Verrucomicrobia     | Verrucomicrobiales  | Verrucomicrobiales     | Protheobacter               |
| sol_extract              | 61     | 0.181785   | 0.001 | Bacteria | Proteobacteria   | Alphaproteobacteria | Caulobacteriales    | Caulobacteriales       | Caulobacter                 |
| sol_extract              | 61     | 0.1991195  | 0.001 | Bacteria | Bacteroidetes    | Chloroflexi         | Chloroflexiales     | Chloroflexiales        | Parafirmomonas              |
| sol_extract              | 61     | 0.1662762  | 0.001 | Bacteria | Bacteroidetes    | Chloroflexi         | Chloroflexiales     | Chloroflexiales        | ?                           |
| sol_extract              | 61     | 0.1402861  | 0.001 | Bacteria | Proteobacteria   | Alphaproteobacteria | Caulobacteriales    | Caulobacteriales       | Phenylololol                |
| sol_extract              | 61     | 0.1906063  | 0.001 | Bacteria | Proteobacteria   | Alphaproteobacteria | Burkholderiales     | Burkholderiales        | Comamonadaceae              |
| sol_extract              | 61     | 0.1722496  | 0.001 | Bacteria | Bacteroidetes    | Chloroflexi         | Chloroflexiales     | Chloroflexiales        | Adhaeribacter               |
| sol_extract              | 61     | 0.1851063  | 0.001 | Bacteria | Bacteroidetes    | Chloroflexi         | Chloroflexiales     | Chloroflexiales        | Terminos                    |
| sol_extract              | 61     | 0.1853213  | 0.001 | Bacteria | Verrucomicrobia  | Gyphales            | Gyphales            | Gyphales               | ?                           |
| sol_extract              | 61     | 0.1794607  | 0.001 | Bacteria | Proteobacteria   | Beta                | Bacteroidia         | Burkholderiales        | ?                           |
| sol_extract              | 61     | 0.1793578  | 0.001 | Bacteria | Proteobacteria   | Alphaproteobacteria | Caulobacteriales    | Caulobacteriales       | Brundimonas                 |
| sol_extract              | 61     | 0.1786837  | 0.001 | Bacteria | Bacteroidetes    | Chloroflexi         | Chloroflexiales     | Chloroflexiales        | Carolinella                 |
| sol_extract              | 61     | 0.1741935  | 0.001 | Bacteria | Fibrobacteres    | Fibrobacteres       | Fibrobacteriales    | Fibrobacteriales       | ?                           |
| sol_extract              | 61     | 0.1407407  | 0.001 | Bacteria | Bacteroidetes    | Sphingobacterii     | Sphingobacteriales  | NS11_11_mainline_group | ?                           |
| sol_extract              | 61     | 0.2285136  | 0.001 | Bacteria | Verrucomicrobia  | Verrucomicrobia     | Verrucomicrobiales  | Verrucomicrobiales     | Microbacterium              |
| sol_extract              | 61     | 0.1883714  | 0.001 | Bacteria | Bacteroidetes    | Chloroflexi         | Chloroflexiales     | Chloroflexiales        | ?                           |
| sol_extract              | 61     | 0.1883407  | 0.001 | Bacteria | Bacteroidetes    | Chloroflexi         | Chloroflexiales     | Chloroflexiales        | Flavobacter                 |
| sol_extract              | 61     | 0.1877435  | 0.001 | Bacteria | Verrucomicrobia  | Verrucomicrobia     | Verrucomicrobiales  | Verrucomicrobiales     | Holofusa                    |
| sol_extract              | 61     | 0.1611429  | 0.001 | Bacteria | Armatimonada     | Fimbrimonada        | Fimbrimonadales     | ?                      | ?                           |
| sol_extract              | 61     | 0.1461335  | 0.001 | Bacteria | Bacteroidetes    | Sphingobacterii     | Sphingobacteriales  | ?                      | ?                           |
| sol_extract              | 61     | 0.15967419 | 0.001 | Bacteria | Bacteroidetes    | Sphingobacterii     | Sphingobacteriales  | env_01_17              | ?                           |
| sol_extract              | 61     | 0.1903743  | 0.001 | Bacteria | Proteobacteria   | Gamma               | Proteobacteria      | Oceanospirillales      | Putidosphingella            |
| sol_extract              | 61     | 0.1742827  | 0.001 | Bacteria |                  |                     |                     |                        |                             |
