# Supplementary material
Source: PubMed Central journal article supplement (PMC7343995)
Supplement: mBio.01349-20-st005.pdf [file mBio.01349-20-st005.pdf]

**Supplemental Table 5. PERMANOVA of Bray-Curtis distances for 16S and RNA-Seq datasets.** PERMANOVA is performed specifically for the 15 samples used for RNA-Seq and the corresponding 16S data. Significance of experimental factors 'ModuleName' and 'Replicate' were calculated using the 'adonis' function within the R 'vegan' package.

16S Dataset

| Factor     | Degrees of Freedom | Sums of Square | Mean Square | F.Model  | R2        | Pr(>F)    |
|------------|--------------------|----------------|-------------|----------|-----------|-----------|
| ModuleName | 4                  | 3.8754175      | 0.9688544   | 6.382776 | 0.7092209 | 0.001 *** |
| Replicate  | 6                  | 0.9817452      | 0.1636242   | 1.07795  | 0.1796643 | 0.374     |
| Residuals  | 4                  | 0.607168       | 0.151792    |          | 0.1111148 |           |
| Total      | 14                 | 5.4643307      |             |          |           | 1         |

RNA-Seq Dataset

| Factor     | Degrees of Freedom | Sums of Square | Mean Square | F.Model   | R2        | Pr(>F)    |
|------------|--------------------|----------------|-------------|-----------|-----------|-----------|
| ModuleName | 4                  | 0.9272224      | 0.23180561  | 6.4071934 | 0.7584665 | 0.001 *** |
| Replicate  | 6                  | 0.150558       | 0.025093    | 0.6935799 | 0.1231562 | 0.787     |
| Residuals  | 4                  | 0.1447159      | 0.03617896  |           | 0.1183773 |           |
| Total      | 14                 | 1.2224963      |             |           |           | 1         |
