# Supplementary material
Source: PubMed Central journal article supplement (PMC7343995)
Supplement: mBio.01349-20-st006.pdf [file mBio.01349-20-st006.pdf]

**Supplemental Table 6.** Enriched or depleted KEGG Categories or Subcategories in a given module relative to at least two of four remaining modules. Fisher's exact test was used to confirm significance of KEGG categories/subcategories in enriched transcripts relative to their proportion in the overall annotated dataset.

| ModuleID          | KEGG_Category                                  | PVal        | Ratio      | PercentaginModule | PercentaginGenome | ModuleID          | KEGG_Category                                       | PVal       | Ratio      | PercentaginModule | PercentaginGenome |
|-------------------|------------------------------------------------|-------------|------------|-------------------|-------------------|-------------------|-----------------------------------------------------|------------|------------|-------------------|-------------------|
| Xylose_Enriched   | Metabolism of other amino acids and amines     | 0.049618502 | 2.29712101 | 0.0263157789      | 0.011455987       | NAG_Depleted      | Translation                                         | 2.48E-43   | 2.241033   | 0.220482714       | 0.098384412       |
| Xylose_Enriched   | Translation                                    | 0.004322146 | 1.55235235 | 0.152727273       | 0.098384412       | NAG_Depleted      | Transcription                                       | 5.67E-17   | 2.51269533 | 0.071102414       | 0.028297268       |
| Xylose_Enriched   | Energy metabolism                              | 0.001112451 | 1.86874447 | 0.190090909       | 0.058376579       | NAG_Depleted      | Energy metabolism                                   | 0.00093487 | 1.36326108 | 0.079582518       | 0.058376579       |
| GlucGent_Enriched | Translation                                    | 4.73E-39    | 2.10831028 | 0.207424867       | 0.098384412       | Xylose_Depleted   | Translation                                         | 3.67E-31   | 2.00845852 | 0.19760101        | 0.098384412       |
| GlucGent_Enriched | Transcription                                  | 9.91E-21    | 2.62388135 | 0.074248674       | 0.028297268       | Xylose_Depleted   | Transcription                                       | 4.74E-16   | 2.43179415 | 0.068813131       | 0.028297268       |
| GlucGent_Enriched | Energy metabolism                              | 0.010154582 | 1.26179712 | 0.073659399       | 0.058376579       | Xylose_Depleted   | Energy metabolism                                   | 0.00283313 | 1.3193682  | 0.077020202       | 0.058376579       |
| Xylan_Enriched    | Translation                                    | 1.12E-21    | 1.93327457 | 0.190240482       | 0.098384412       | GlucGent_Depleted | Cell motility and adherence                         | 0.03874838 | 1.91328729 | 0.037617555       | 0.019661216       |
| Xylan_Enriched    | Transcription                                  | 2.43E-07    | 1.99052892 | 0.056326531       | 0.028297268       | GlucGent_Depleted | Regulatory functions                                | 0.00040184 | 2.28831978 | 0.068965517       | 0.030138059       |
| Xylan_Enriched    | Energy metabolism                              | 0.000353709 | 1.44033162 | 0.084081633       | 0.058376579       | Xylan_Depleted    | Translation                                         | 1.19E-32   | 2.422258   | 0.238312429       | 0.098384412       |
| Pectin_Enriched   | Translation                                    | 5.34E-51    | 2.49965488 | 0.245927075       | 0.098384412       | Xylan_Depleted    | Transcription                                       | 6.91E-16   | 2.98186251 | 0.084378563       | 0.028297268       |
| Pectin_Enriched   | Transcription                                  | 4.75E-16    | 2.60451089 | 0.073700543       | 0.028297268       | Pectin_Depleted   | Transcription                                       | 0.00357354 | 2.39275159 | 0.067708333       | 0.028297268       |
| Pectin_Enriched   | Energy metabolism                              | 0.005725169 | 1.32894939 | 0.077579519       | 0.058376579       | Pectin_Depleted   | Intracellular trafficking, assembly, and processing | 0.04629487 | 1.4601039  | 0.135416667       | 0.092744541       |
| ModuleID          | KEGG_Subcategory                               | PVal        | Ratio      | PercentaginModule | PercentaginGenome | ModuleID          | KEGG_Subcategory                                    | PVal       | Ratio      | PercentaginModule | PercentaginGenome |
| NAG_Enriched      | Ribosomal proteins: synthesis and modification | 0.012865889 | 1.84336871 | 0.078947368       | 0.042827769       | NAG_Depleted      | Translation factors                                 | 6.91E-28   | 4.15816311 | 0.060013046       | 0.014432586       |
| NAG_Enriched      | Cell division                                  | 0.024403816 | 2.7368957  | 0.026315789       | 0.009615196       | NAG_Depleted      | Ribosomal proteins: synthesis and modification      | 1.61E-37   | 2.9243788  | 0.125244618       | 0.042827769       |
| NAG_Enriched      | Benzoate degradation                           | 0.019706164 | 5.37526316 | 0.013157895       | 0.002447861       | NAG_Depleted      | Chaperone and folding catalysis                     | 3.92E-06   | 1.76731342 | 0.051532942       | 0.029158915       |
| NAG_Enriched      | Phosphotransferase system (PTS)                | 0.023511989 | 5.01423802 | 0.013157895       | 0.002624107       | NAG_Depleted      | RNA polymerase                                      | 3.98E-29   | 4.94166792 | 0.052837573       | 0.010692255       |
| NAG_Enriched      | Phosphonate and phosphate metabolism           | 0.004287639 | 9.59868421 | 0.013157895       | 0.001370802       | NAG_Depleted      | Pyrimidine metabolism                               | 0.03711138 | 1.43189942 | 0.024787997       | 0.01731127        |
| Xylose_Enriched   | Ribosomal proteins: synthesis and modification | 3.63E-06    | 2.5472004  | 0.190909099       | 0.042827769       | NAG_Depleted      | Oxidative phosphorylation                           | 7.07E-07   | 1.77226372 | 0.057403783       | 0.032390091       |
| Xylose_Enriched   | Chaperone and folding catalysis                | 0.000831665 | 2.3694609  | 0.069090909       | 0.029158915       | NAG_Depleted      | Citrate cycle (TCA cycle)                           | 0.0020732  | 1.60532541 | 0.031311155       | 0.019504553       |
| Xylose_Enriched   | Pentose and glucuronate interconversions       | 0.01169392  | 3.77420547 | 0.018181818       | 0.00481739        | NAG_Depleted      | Carbohydrates, organic alcohols, and acids          | 8.64E-05   | 1.70005753 | 0.041748206       | 0.024556937       |
| Xylose_Enriched   | Carbohydrates, organic alcohols, and acids     | 0.000567951 | 2.51734087 | 0.061818182       | 0.024556937       | NAG_Depleted      | Glycolysis / Gluconeogenesis                        | 1.91E-05   | 2.06186053 | 0.029354207       | 0.014236757       |
| Xylose_Enriched   | Benzoate degradation                           | 0.031804516 | 4.6558182  | 0.010909091       | 0.002447861       | NAG_Depleted      | Alanine, aspartate and glutamate metabolism         | 0.00062709 | 1.85058346 | 0.024135682       | 0.013042201       |
| Xylose_Enriched   | Sulfur metabolism                              | 0.026530316 | 3.62323725 | 0.014545455       | 0.004014491       | NAG_Depleted      | Nitrogen metabolism                                 | 0.01908593 | 1.735783   | 0.01369863        | 0.007891902       |
| Xylose_Enriched   | Electron transport                             | 0.027657076 | 3.00470727 | 0.018181818       | 0.006051111       | NAG_Depleted      | Sporulation and germination                         | 0.00334316 | 3.88622527 | 0.00456621        | 0.001174973       |
| Xylose_Enriched   | One carbon pool by folate                      | 0.049006924 | 5.80284091 | 0.007272727       | 0.001253305       | Xylose_Depleted   | Translation factors                                 | 1.45E-24   | 3.84931404 | 0.055555556       | 0.014432586       |
| GlucGent_Enriched | Translation factors                            | 5.99E-26    | 3.83797251 | 0.055931868       | 0.014432586       | Xylose_Depleted   | Ribosomal proteins: synthesis and modification      | 4.07E-27   | 2.95014855 | 0.109217172       | 0.042827769       |
| GlucGent_Enriched | Ribosomal proteins: synthesis and modification | 9.15E-36    | 2.76559619 | 0.18444313        | 0.042827769       | Xylose_Depleted   | Chaperone and folding catalysis                     | 3.20E-05   | 1.66710973 | 0.048611111       | 0.029158915       |
| GlucGent_Enriched | Chaperone and folding catalysis                | 4.18E-06    | 1.7177728  | 0.050088391       | 0.029158915       | Xylose_Depleted   | RNA polymerase                                      | 1.58E-22   | 4.25116555 | 0.054545454       | 0.010692255       |
| GlucGent_Enriched | RNA polymerase                                 | 1.93E-31    | 4.90499826 | 0.052445492       | 0.010692255       | Xylose_Depleted   | Pyrimidine metabolism                               | 0.02470083 | 1.45873326 | 0.025252525       | 0.01731127        |
| GlucGent_Enriched | Pyrimidine metabolism                          | 0.008223088 | 1.53179886 | 0.026517384       | 0.01731127        | Xylose_Depleted   | Oxidative phosphorylation                           | 1.61E-05   | 1.6567294  | 0.053661616       | 0.032390091       |
| GlucGent_Enriched | Oxidative phosphorylation                      | 3.23E-06    | 1.6919555  | 0.054802593       | 0.032390091       | Xylose_Depleted   | Carbohydrates, organic alcohols, and acids          | 0.00402441 | 1.491072   | 0.036616162       | 0.024556937       |
| GlucGent_Enriched | Citrate cycle (TCA cycle)                      | 6.19E-05    | 1.782519   | 0.034767236       | 0.019504553       | Xylose_Depleted   | Glycolysis / Gluconeogenesis                        | 1.62E-05   | 2.03981875 | 0.029040404       | 0.014236757       |
| GlucGent_Enriched | Carbohydrates, organic alcohols, and acids     | 0.017050829 | 1.39178436 | 0.034177961       | 0.024556937       | Xylose_Depleted   | Alanine, aspartate and glutamate metabolism         | 0.003634   | 1.69418945 | 0.02209596        | 0.013042201       |
| GlucGent_Enriched | Glycolysis / Gluconeogenesis                   | 4.69E-06    | 2.06955555 | 0.02946376        | 0.014236757       | Xylose_Depleted   | Nitrogen metabolism                                 | 0.03028792 | 1.67989604 | 0.013257576       | 0.007891902       |
| GlucGent_Enriched | Alanine, aspartate and glutamate metabolism    | 0.001155353 | 1.76210536 | 0.022981732       | 0.013042201       | Xylose_Depleted   | Sporulation and germination                         | 0.00022072 | 4.83570076 | 0.005681818       | 0.001174973       |
| GlucGent_Enriched | Sporulation and germination                    | 1.61E-05    | 5.1674524  | 0.006482027       | 0.001174973       | GlucGent_Depleted | Amino acids, peptides and amines                    | 0.01504968 | 1.9601433  | 0.047021944       | 0.023989034       |
| GlucGent_Enriched | Invasion response                              | 0.020779427 | 4.15052933 | 0.002357101       | 0.000567904       | GlucGent_Depleted | Terpenoid backbone biosynthesis                     | 0.01564237 | 3.04911181 | 0.018808777       | 0.006168609       |
| Xylan_Enriched    | Amino acids, peptides and amines               | 0.002512013 | 1.59937026 | 0.038367347       | 0.023989034       | GlucGent_Depleted | Surface structures and assembly platforms           | 0.04845745 | 2.14664481 | 0.021943574       | 0.010222266       |
| Xylan_Enriched    | Translation factors                            | 7.63E-18    | 3.76487469 | 0.053061224       | 0.014432586       | GlucGent_Depleted | Cell division                                       | 0.03707139 | 2.28217635 | 0.021943574       | 0.009615196       |
| Xylan_Enriched    | Ribosomal proteins: synthesis and modification | 1.39E-19    | 2.45882814 | 0.105306122       | 0.042827769       | GlucGent_Depleted | Protein interactions                                | 0.00917695 | 2.79612873 | 0.02507837        | 0.008968961       |
| Xylan_Enriched    | Chaperone and folding catalysis                | 3.64E-05    | 1.76373405 | 0.051428571       | 0.029158915       | GlucGent_Depleted | Peptidoglycan metabolism                            | 0.01011004 | 2.41081882 | 0.03147962        | 0.013003035       |
| Xylan_Enriched    | RNA polymerase                                 | 4.86E-14    | 3.74102564 | 0.04              | 0.010692255       | Xylan_Depleted    | Translation factors                                 | 7.23E-18   | 4.26628648 | 0.061573546       | 0.014432586       |
| Xylan_Enriched    | Oxidative phosphorylation                      | 3.19E-06    | 1.81461392 | 0.05877551        | 0.032390091       | Xylan_Depleted    | Ribosomal proteins: synthesis and modification      | 1.08E-31   | 3.38126089 | 0.144811859       | 0.042827769       |
| Xylan_Enriched    | Citrate cycle (TCA cycle)                      | 0.028666492 | 1.46485944 | 0.028571429       | 0.019504553       | Xylan_Depleted    | Chaperone and folding catalysis                     | 0.00236254 | 1.64239773 | 0.047890536       | 0.029158915       |
| Xylan_Enriched    | Carbohydrates, organic alcohols, and acids     | 0.000780752 | 1.66210982 | 0.040816327       | 0.024556937       | Xylan_Depleted    | RNA polymerase                                      | 1.50E-22   | 5.65206268 | 0.060433295       | 0.010692255       |
| Xylan_Enriched    | Glycolysis / Gluconeogenesis                   | 0.005198951 | 1.72018078 | 0.024489796       | 0.014236757       | Xylan_Depleted    | Oxidative phosphorylation                           | 0.01600135 | 1.47855515 | 0.047890536       | 0.032390091       |
| Xylan_Enriched    | Alanine, aspartate and glutamate metabolism    | 0.003284254 | 1.81514372 | 0.023673469       | 0.013042201       | Xylan_Depleted    | Citrate cycle (TCA cycle)                           | 0.0368599  | 1.51997958 | 0.029646522       | 0.019504553       |
| Xylan_Enriched    | Sporulation and germination                    | 0.00018892  | 5.55809524 | 0.006530612       | 0.001174973       | Xylan_Depleted    | Carbohydrates, organic alcohols, and acids          | 0.04771146 | 1.43942122 | 0.035347777       | 0.024556937       |
| Xylan_Enriched    | Ascorbate and aldarate metabolism              | 0.033050503 | 2.93561368 | 0.004081633       | 0.001390385       | Xylan_Depleted    | Glycolysis / Gluconeogenesis                        | 2.17E-05   | 2.40276107 | 0.034207526       | 0.014236757       |
| Pectin_Enriched   | Translation factors                            | 2.21E-33    | 4.94527854 | 0.071373157       | 0.014432586       | Xylan_Depleted    | Alanine, aspartate and glutamate metabolism         | 0.00025046 | 2.27312261 | 0.029646522       | 0.013042201       |
| Pectin_Enriched   | Ribosomal proteins: synthesis and modification | 5.15E-41    | 3.2424603  | 0.138867339       | 0.042827769       | Xylan_Depleted    | Nitrogen metabolism                                 | 0.00629426 | 2.16725471 | 0.017103763       | 0.007891902       |
| Pectin_Enriched   | Chaperone and folding catalysis                | 1.31E-05    | 1.7258613  | 0.051978278       | 0.029158915       | Pectin_Depleted   | Transcription factors                               | 0.04149475 | 2.21372746 | 0.036458333       | 0.016469206       |
| Pectin_Enriched   | RNA polymerase                                 | 1.42E-25    | 5.00641523 | 0.053529868       | 0.010692255       | Pectin_Depleted   | Chaperone and folding catalysis                     | 0.00058981 | 2.6792835  | 0.078125          | 0.029158915       |
| Pectin_Enriched   | Oxidative phosphorylation                      | 1.73E-05    | 1.72451672 | 0.05857254        | 0.032390091       | Pectin_Depleted   | RNA polymerase                                      | 0.01828991 | 2.92267628 | 0.03125           | 0.010692255       |
| Pectin_Enriched   | Carbohydrates, organic alcohols, and acids     | 0.022998388 | 1.42162613 | 0.034910784       | 0.024556937       | Pectin_Depleted   | Pentose and glucuronate interconversions            | 0.00265758 | 5.40576304 | 0.026041667       | 0.00481739        |
| Pectin_Enriched   | Glycolysis / Gluconeogenesis                   | 8.83E-07    | 2.34317359 | 0.033359193       | 0.014236757       | Pectin_Depleted   | Protein interactions                                | 0.00837373 | 3.48423854 | 0.03125           | 0.008968961       |
| Pectin_Enriched   | Alanine, aspartate and glutamate metabolism    | 0.00047532  | 1.96295403 | 0.025601241       | 0.013042201       | Pectin_Depleted   | Carbohydrates, organic alcohols, and acids          | 0.02965815 | 2.12092138 | 0.052083333       | 0.024556937       |
| Pectin_Enriched   | Nitrogen metabolism                            | 0.01104977  | 1.86775098 | 0.014740109       | 0.007891902       | Pectin_Depleted   | Carbon fixation in prokaryotes                      | 0.01890367 | 4.01454403 | 0.020833333       | 0.005189464       |
|                   |                                                |             |            |                   |                   | Pectin_Depleted   | Sporulation and germination                         | 4.82E-06   | 22.1636285 | 0.026041667       | 0.001174973       |
