# Supplementary material
Source: PubMed Central journal article supplement (PMC7343995)
Supplement: mBio.01349-20-st007.pdf [file mBio.01349-20-st007.pdf]

|           |                                                     |                                                     |                                                                         |            |          |                                            |              |              |                    |                |           |          |
|-----------|-----------------------------------------------------|-----------------------------------------------------|-------------------------------------------------------------------------|------------|----------|--------------------------------------------|--------------|--------------|--------------------|----------------|-----------|----------|
| 1365210_7 | No roles mapped of 0 KOs                            | Protein export, secretion, and sorting              | 3-oxoacyl-ACP reductase FabG                                            | 7944448796 | 4.83E-07 | Getamipin_ErnicheRelatatio_OtherSubstrates | Bacteria     | Proteobacter | Betaproteobacteria | Burkholderia   | Comamonas | Varioxax |
| 1377780_5 | Intracellular trafficking, assembly, and processing | Protein export, secretion, and sorting              | Protein translocase subunit SecE                                        | 5108732204 | 5.00E-07 | Getamipin_ErnicheRelatatio_OtherSubstrates | Bacteria     | Proteobacter | Betaproteobacteria | Burkholderia   | Comamonas | Varioxax |
| 155193_3  | Defense and invasion systems                        | Detoxification and inactivation                     | Peroxisidase                                                            | 793037669  | 1.13E-07 | Getamipin_ErnicheRelatatio_OtherSubstrates | Bacteria     | Proteobacter | Betaproteobacteria | Burkholderia   | Comamonas | Varioxax |
| 120200_3  | Defense and invasion systems                        | Detoxification and inactivation                     | Catalase                                                                | 792605658  | 3.76E-08 | Getamipin_ErnicheRelatatio_OtherSubstrates | Bacteria     | Proteobacter | Betaproteobacteria | Burkholderia   | Comamonas | Varioxax |
| 154247_4  | No roles mapped of 0 KOs                            |                                                     | Citrate synthase                                                        | 792934956  | 1.24E-07 | Getamipin_ErnicheRelatatio_OtherSubstrates | Bacteria     | Proteobacter | Betaproteobacteria | Burkholderia   | Comamonas | Varioxax |
| 136661_4  | Carbohydrate metabolism                             | Citrate cycle (TCA cycle)                           | Citrate synthase                                                        | 792934956  | 1.25E-06 | Getamipin_ErnicheRelatatio_OtherSubstrates | Bacteria     | Proteobacter | Betaproteobacteria | Burkholderia   | Comamonas | Varioxax |
| 122820_9  | Transport and binding proteins                      | Cations and ion carrying compounds                  | Iron transporter ynfM                                                   | 7910434316 | 8.64E-07 | Getamipin_ErnicheRelatatio_OtherSubstrates | Bacteria     | Proteobacter | Betaproteobacteria | Burkholderia   | Comamonas | Varioxax |
| 115175_5  | Transport and binding proteins                      | Cell structure, growth, and death                   | Iron-sulfur S-adenosylmethionine (SAM) family, citrate/isocitrate lyase | 7910314316 | 9.82E-07 | Getamipin_ErnicheRelatatio_OtherSubstrates | Bacteria     | Proteobacter | Betaproteobacteria | Burkholderia   | Comamonas | Varioxax |
| 34567_4   | Translation                                         | Translation factors                                 | Elongation factor Tu                                                    | 7903818695 | 1.50E-06 | Getamipin_ErnicheRelatatio_OtherSubstrates | Bacteria     | Proteobacter | Betaproteobacteria | Burkholderia   | Comamonas | Varioxax |
| 945075_1  | Translation                                         | Ribosomal proteins: synthesis and modification      | 16S ribosomal protein L12                                               | 7911671125 | 6.70E-07 | Getamipin_ErnicheRelatatio_OtherSubstrates | Bacteria     | Proteobacter | Betaproteobacteria | Burkholderia   | Comamonas | Varioxax |
| 480346_4  | Translation                                         | Ribosomal proteins: synthesis and modification      | 50S ribosomal protein L19                                               | 7988312045 | 3.83E-08 | Getamipin_ErnicheRelatatio_OtherSubstrates | Bacteria     | Proteobacter | Betaproteobacteria | Burkholderia   | Comamonas | Varioxax |
| 54590_2   | Energy metabolism                                   | Oxidative phosphorylation                           | Cytochrome c oxidase_cbb3_type subunit II                               | 788573449  | 4.88E-07 | Getamipin_ErnicheRelatatio_OtherSubstrates | Bacteria     | Proteobacter | Betaproteobacteria | Burkholderia   | Comamonas | Varioxax |
| 167770_3  | Translation                                         | Ribosomal proteins: synthesis and modification      | Transfer B biogenesis                                                   | 788442424  | 3.64E-07 | Getamipin_ErnicheRelatatio_OtherSubstrates | Bacteria     | Proteobacter | Betaproteobacteria | Burkholderia   | Comamonas | Varioxax |
| 96070_6   | Energy metabolism                                   | Oxidative phosphorylation                           | Threonine--cysA ligase                                                  | 7866608398 | 1.17E-05 | Getamipin_ErnicheRelatatio_OtherSubstrates | Bacteria     | Proteobacter | Betaproteobacteria | Burkholderia   | Comamonas | Varioxax |
| 94508_7   | No roles mapped of 0 KOs                            |                                                     | Nif_in_Unref                                                            | 788442424  | 4.29E-05 | Getamipin_ErnicheRelatatio_OtherSubstrates | Nif_in_Unref | Proteobacter | Betaproteobacteria | Burkholderia   | Comamonas | Varioxax |
| 138951_1  | Fatty acid and lipid metabolism                     | Biohydrogen                                         | 3-oxoacyl-(acyl carrier)-protein synthase 3                             | 783977275  | 6.04E-07 | Getamipin_ErnicheRelatatio_OtherSubstrates | Bacteria     | Proteobacter | Betaproteobacteria | Burkholderia   | Comamonas | Varioxax |
| 141912_4  | Translation                                         | Ribosomal proteins: synthesis and modification      | GTPase Drp                                                              | 782328704  | 4.51E-06 | Getamipin_ErnicheRelatatio_OtherSubstrates | Bacteria     | Proteobacter | Betaproteobacteria | Burkholderia   | Comamonas | Varioxax |
| 154889_2  | Amino acid metabolism                               | Phenylalanine, tyrosine and tryptophan biosynthesis | Glutamine amidotransferase, class I                                     | 781904968  | 9.26E-07 | Getamipin_ErnicheRelatatio_OtherSubstrates | Bacteria     | Proteobacter | Betaproteobacteria | Burkholderia   | Comamonas | Varioxax |
| 71984_6   | Energy metabolism                                   | Oxidative phosphorylation                           | Cbb3-type cytochrome c oxidase subunit                                  | 781878274  | 3.28E-05 | Getamipin_ErnicheRelatatio_OtherSubstrates | Bacteria     | Proteobacter | Betaproteobacteria | Burkholderia   | Comamonas | Varioxax |
| 168175_1  | Nucleic acid metabolism                             | DNA replication, recombination, and repair          | Superoxide dismutase                                                    | 781293068  | 1.11E-05 | Getamipin_ErnicheRelatatio_OtherSubstrates | Bacteria     | Proteobacter | Betaproteobacteria | Burkholderia   | Comamonas | Varioxax |
| 68175_1   | Intracellular trafficking, assembly, and processing | Oxidation and folding catalysis                     | Disulfide isomerase                                                     | 780981075  | 6.83E-07 | Getamipin_ErnicheRelatatio_OtherSubstrates | Bacteria     | Proteobacter | Betaproteobacteria | Burkholderia   | Comamonas | Varioxax |
| 10675_1   | Translation                                         | Translation factors                                 | DNA-directed RNA polymerase subunit beta                                | 780142825  | 4.05E-07 | Getamipin_ErnicheRelatatio_OtherSubstrates | Bacteria     | Proteobacter | Betaproteobacteria | Burkholderia   | Comamonas | Varioxax |
| 79437_7   | Translation                                         | Ribosomal proteins: synthesis and modification      | 30S ribosomal protein S9                                                | 799948899  | 2.45E-05 | Getamipin_ErnicheRelatatio_OtherSubstrates | Bacteria     | Proteobacter | Betaproteobacteria | Burkholderia   | Comamonas | Varioxax |
| 71764_7   | Translation                                         | Ribosomal proteins: synthesis and modification      | 50S ribosomal protein L12                                               | 7990234181 | 1.64E-07 | Getamipin_ErnicheRelatatio_OtherSubstrates | Bacteria     | Proteobacter | Betaproteobacteria | Burkholderia   | Comamonas | Varioxax |
| 168388_1  | Amino acid metabolism                               | Alanine, aspartate and glutamate metabolism         | aspartate/tyrosine/serine amidotransferase                              | 7788366975 | 3.57E-06 | Getamipin_ErnicheRelatatio_OtherSubstrates | Bacteria     | Proteobacter | Betaproteobacteria | Burkholderia   | Comamonas | Varioxax |
| 145187_4  | Transport and binding proteins                      | Nucleosides, purines and pyrimidines                | Putative hydroxymeripyrinidase translocase CpxK                         | 778545447  | 7.78E-07 | Getamipin_ErnicheRelatatio_OtherSubstrates | Bacteria     | Proteobacter | Betaproteobacteria | Burkholderia   | Comamonas | Varioxax |
| 137921_4  | Transport and binding proteins                      | Carbohydrates, organic alcohols, and acids          | MSP transporter                                                         | 776978791  | 3.82E-12 | Getamipin_ErnicheRelatatio_OtherSubstrates | Bacteria     | Proteobacter | Betaproteobacteria | Burkholderia   | Comamonas | Varioxax |
| 34567_2   | Translation                                         | Translation factors                                 | Elongation factor G                                                     | 777470797  | 4.62E-06 | Getamipin_ErnicheRelatatio_OtherSubstrates | Bacteria     | Proteobacter | Betaproteobacteria | Burkholderia   | Comamonas | Varioxax |
| 120472_1  | No roles mapped of 0 KOs                            |                                                     | Uncharacterized protein                                                 | 774991556  | 2.77E-07 | Getamipin_ErnicheRelatatio_OtherSubstrates | Bacteria     | Proteobacter | Betaproteobacteria | Burkholderia   | Comamonas | Varioxax |
| 62795_8   | Translation                                         | Ribosomal proteins: synthesis and modification      | 50S ribosomal protein L31                                               | 757388235  | 3.44E-05 | Getamipin_ErnicheRelatatio_OtherSubstrates | Bacteria     | Proteobacter | Betaproteobacteria | Burkholderia   | Comamonas | Varioxax |
| 13884_1   | Nucleic acid metabolism                             | Purine metabolism                                   | Catabolism-ympH-like protein large chain                                | 776393464  | 2.39E-08 | Getamipin_ErnicheRelatatio_OtherSubstrates | Bacteria     | Proteobacter | Betaproteobacteria | Burkholderia   | Comamonas | Varioxax |
| 13884_1   | No roles mapped of 0 KOs                            |                                                     | Metal-dependent phosphatase, phosphodiesterase/enolase                  | 776393260  | 3.86E-08 | Getamipin_ErnicheRelatatio_OtherSubstrates | Bacteria     | Proteobacter | Betaproteobacteria | Burkholderia   | Comamonas | Varioxax |
| 31418_1   | Fatty acid and lipid metabolism                     | Biohydrogen                                         | acyl-CoA desaturase                                                     | 775522402  | 4.08E-08 | Getamipin_ErnicheRelatatio_OtherSubstrates | Bacteria     | Proteobacter | Betaproteobacteria | Burkholderia   | Comamonas | Varioxax |
| 34567_1   | Translation                                         | Ribosomal proteins: synthesis and modification      | 16S ribosomal protein S7                                                | 774532877  | 1.81E-08 | Getamipin_ErnicheRelatatio_OtherSubstrates | Bacteria     | Proteobacter | Betaproteobacteria | Burkholderia   | Comamonas | Varioxax |
| 148011_1  | No roles mapped of 0 KOs                            |                                                     | Uncharacterized protein                                                 | 774532876  | 1.04E-06 | Getamipin_ErnicheRelatatio_OtherSubstrates | Bacteria     | Proteobacter | Betaproteobacteria | Burkholderia   | Comamonas | Varioxax |
| 157659_6  | Regulatory functions                                | DNA interactions                                    | MetF uracil regulation protein                                          | 774547074  | 3.96E-05 | Getamipin_ErnicheRelatatio_OtherSubstrates | Bacteria     | Proteobacter | Betaproteobacteria | Burkholderia   | Comamonas | Varioxax |
| 14872_4   | Translation                                         | ORF base modification                               | anti-sense specific RNA methyltransferase RlmM                          | 774545208  | 2.45E-05 | Getamipin_ErnicheRelatatio_OtherSubstrates | Bacteria     | Proteobacter | Betaproteobacteria | Burkholderia   | Comamonas | Varioxax |
| 97422_2   | No roles mapped of 0 KOs                            |                                                     | DNA topoisomerase III                                                   | 774167489  | 1.06E-05 | Getamipin_ErnicheRelatatio_OtherSubstrates | Bacteria     | Proteobacter | Betaproteobacteria | Burkholderia   | Comamonas | Varioxax |
| 165701_2  | Transport and binding proteins                      | Carbohydrates, organic alcohols, and acids          | MSP domain-containing protein                                           | 773888861  | 1.86E-08 | Getamipin_ErnicheRelatatio_OtherSubstrates | Bacteria     | Proteobacter | Betaproteobacteria | Burkholderia   | Comamonas | Varioxax |
| 179512_1  | Amino acid metabolism                               | Alanine, aspartate and glutamate metabolism         | Hydroxy methylglutaryl-CoA synthase                                     | 773851212  | 2.45E-05 | Getamipin_ErnicheRelatatio_OtherSubstrates | Bacteria     | Proteobacter | Betaproteobacteria | Burkholderia   | Comamonas | Varioxax |
| 400358_1  | Amino acid metabolism                               | Valine, leucine and isoleucine metabolism           | Acetyl-CoA synthase                                                     | 771531082  | 1.53E-05 | Getamipin_ErnicheRelatatio_OtherSubstrates | Bacteria     | Proteobacter | Betaproteobacteria | Burkholderia   | Comamonas | Varioxax |
| 93408_1   | Translation                                         | Translation factors                                 | Initiation factor 2                                                     | 770859959  | 4.74E-07 | Getamipin_ErnicheRelatatio_OtherSubstrates | Bacteria     | Proteobacter | Betaproteobacteria | Burkholderia   | Comamonas | Varioxax |
| 93284_2   | Amino acid metabolism                               | Histidine metabolism                                | Acetolactate synthase                                                   | 770315432  | 3.47E-16 | Getamipin_ErnicheRelatatio_OtherSubstrates | Bacteria     | Proteobacter | Betaproteobacteria | Burkholderia   | Comamonas | Varioxax |
| 174970_4  | Translation                                         | Transcription factors                               | Transcription termination/antitermination protein Nts                   | 770283486  | 3.54E-08 | Getamipin_ErnicheRelatatio_OtherSubstrates | Bacteria     | Proteobacter | Betaproteobacteria | Burkholderia   | Comamonas | Varioxax |
| 180351_1  | Glycan biosynthesis and metabolism                  | Carbohydrates and glycosylation                     | Arabinose 5-epimerase                                                   | 768251261  | 1.62E-07 | Getamipin_ErnicheRelatatio_OtherSubstrates | Bacteria     | Proteobacter | Betaproteobacteria | Burkholderia   | Comamonas | Varioxax |
| 19922_2   | No roles mapped of 1 KOs                            |                                                     | Cyanuric acid lyase                                                     | 768169119  | 7.04E-06 | Getamipin_ErnicheRelatatio_OtherSubstrates | Bacteria     | Proteobacter | Betaproteobacteria | Burkholderia   | Comamonas | Varioxax |
| 96262_1   | Energy metabolism                                   | Oxidative phosphorylation                           | Cytochrome c oxidase subunit 2 (Fragment)                               | 767992929  | 1.05E-05 | Getamipin_ErnicheRelatatio_OtherSubstrates | Bacteria     | Proteobacter | Betaproteobacteria | Burkholderia   | Comamonas | Varioxax |
| 174548_1  | Energy metabolism                                   | Transfer B biogenesis                               | Threonine--cysA ligase                                                  | 767727747  | 1.65E-05 | Getamipin_ErnicheRelatatio_OtherSubstrates | Bacteria     | Proteobacter | Betaproteobacteria | Burkholderia   | Comamonas | Varioxax |
| 154889_1  | Energy metabolism                                   | Oxidative phosphorylation                           | Succinate dehydrogenase flavoprotein subunit c                          | 766702912  | 1.30E-05 | Getamipin_ErnicheRelatatio_OtherSubstrates | Bacteria     | Proteobacter | Betaproteobacteria | Burkholderia   | Comamonas | Varioxax |
| 10087_3   | No roles mapped of 0 KOs                            |                                                     | Nif_in_Unref                                                            | 766503256  | 1.54E-10 | Getamipin_ErnicheRelatatio_OtherSubstrates | Nif_in_Unref | Proteobacter | Betaproteobacteria | Burkholderia   | Comamonas | Varioxax |
| 20095_2   | Energy metabolism                                   | Oxidative phosphorylation                           | NADH:quinone oxidoreductase subunit E                                   | 766503256  | 6.78E-05 | Getamipin_ErnicheRelatatio_OtherSubstrates | Bacteria     | Proteobacter | Betaproteobacteria | Burkholderia   | Comamonas | Varioxax |
| 20088_2   | Transport and binding proteins                      | Carbohydrates, organic alcohols, and acids          | Bmp domain-containing protein                                           | 766051341  | 2.55E-07 | Getamipin_ErnicheRelatatio_OtherSubstrates | Bacteria     | Proteobacter | Betaproteobacteria | Burkholderia   | Comamonas | Varioxax |
| 125575_1  | Carbohydrate metabolism                             | Citrate cycle (TCA cycle)                           | Isocitrate dehydrogenase (NADP)                                         | 764612892  | 1.75E-11 | Getamipin_ErnicheRelatatio_OtherSubstrates | Bacteria     | Proteobacter | Betaproteobacteria | Burkholderia   | Comamonas | Varioxax |
| 176009_22 | Carbohydrate metabolism                             | Citrate cycle (TCA cycle)                           | Isocitrate dehydrogenase (NADP)                                         | 764402055  | 6.64E-06 | Getamipin_ErnicheRelatatio_OtherSubstrates | Bacteria     | Proteobacter | Betaproteobacteria | Burkholderia   | Comamonas | Varioxax |
| 151760_3  | Translation                                         | Ribosomal proteins: synthesis and modification      | 30S ribosomal protein S6                                                | 763592494  | 7.74E-08 | Getamipin_ErnicheRelatatio_OtherSubstrates | Bacteria     | Proteobacter | Betaproteobacteria | Burkholderia   | Comamonas | Varioxax |
| 99769_2   | Metabolism of other amino acids and amines          | Glyoxylate shunt and anaplerotic reactions          | Glyoxylate shunt                                                        | 763575522  | 2.69E-08 | Getamipin_ErnicheRelatatio_OtherSubstrates | Bacteria     | Proteobacter | Betaproteobacteria | Burkholderia   | Comamonas | Varioxax |
| 47441_2   | Cell motility and adherence                         | Surface structures and assembly                     | Type IV pilus biogenesis protein PilQ                                   | 763135058  | 5.77E-08 | Getamipin_ErnicheRelatatio_OtherSubstrates | Bacteria     | Proteobacter | Betaproteobacteria | Burkholderia   | Comamonas | Varioxax |
| 115641_2  | Carbohydrate metabolism                             | Citrate cycle (TCA cycle)                           | Glutamate dehydrogenase                                                 | 762993282  | 2.45E-05 | Getamipin_ErnicheRelatatio_OtherSubstrates | Bacteria     | Proteobacter | Betaproteobacteria | Burkholderia   | Comamonas | Varioxax |
| 115641_2  | Translation                                         | Translation factors                                 | DNA-directed RNA polymerase subunit alpha                               | 762946743  | 5.37E-07 | Getamipin_ErnicheRelatatio_OtherSubstrates | Bacteria     | Proteobacter | Betaproteobacteria | Burkholderia   | Comamonas | Varioxax |
| 150137_1  | Energy metabolism                                   | Oxidative phosphorylation                           | ATP synthase subunit beta                                               | 762709722  | 1.78E-05 | Getamipin_ErnicheRelatatio_OtherSubstrates | Bacteria     | Proteobacter | Betaproteobacteria | Burkholderia   | Comamonas | Varioxax |
| 127007_1  | Translation                                         | Ribosomal proteins: synthesis and modification      | 30S ribosomal protein S4                                                | 761972495  | 3.05E-07 | Getamipin_ErnicheRelatatio_OtherSubstrates | Bacteria     | Proteobacter | Betaproteobacteria | Burkholderia   | Comamonas | Varioxax |
| 161570_3  | Amino acid metabolism                               | Valine, leucine and isoleucine metabolism           | Succinyl-CoA:3-oxoacid coenzyme A transferase sub                       | 761862565  | 8.49E-06 | Getamipin_ErnicheRelatatio_OtherSubstrates | Bacteria     | Proteobacter | Betaproteobacteria | Burkholderia   | Comamonas | Varioxax |
| 52728_2   | Intracellular trafficking, assembly, and processing | Protein export, secretion, and sorting              | Translocase subunit SecE                                                | 761621046  | 1.26E-06 | Getamipin_ErnicheRelatatio_OtherSubstrates | Bacteria     | Proteobacter | Betaproteobacteria | Burkholderia   | Comamonas | Varioxax |
| 104240_3  | Translation                                         | Translation factors                                 | Elongation factor Tu                                                    | 761403765  | 3.49E-07 | Getamipin_ErnicheRelatatio_OtherSubstrates | Bacteria     | Proteobacter | Betaproteobacteria | Burkholderia   | Comamonas | Varioxax |
| 362340_18 | Intracellular trafficking, assembly, and processing | Chaperone and folding catalysis                     | 60 kDa chaperonin                                                       | 761201901  | 1.63E-04 | Getamipin_ErnicheRelatatio_OtherSubstrates | Bacteria     | Proteobacter | Betaproteobacteria | Burkholderia   | Comamonas | Varioxax |
| 94382_1   | Cell motility and adherence                         | Surface structures and assembly                     | Flagella core and associated proteins                                   | 719948004  | 1.23E-08 | Getamipin_ErnicheRelatatio_OtherSubstrates | Bacteria     | Proteobacter | Betaproteobacteria | Burkholderia   | Comamonas | Varioxax |
| 438208_4  | No roles mapped of 0 KOs                            |                                                     | Nif_in_Unref                                                            | 759662003  | 1.63E-05 | Getamipin_ErnicheRelatatio_OtherSubstrates | Nif_in_Unref | Proteobacter | Betaproteobacteria | Burkholderia   | Comamonas | Varioxax |
| 1162459_3 | Energy metabolism                                   | Oxidative phosphorylation                           | Cytochrome c ubiquinol oxidase subunit I                                | 759647048  | 5.97E-08 | Getamipin_ErnicheRelatatio_OtherSubstrates | Bacteria     | Proteobacter | Betaproteobacteria | Burkholderia   | Comamonas | Varioxax |
| 117273_7  | No roles mapped of 0 KOs                            |                                                     | Uncharacterized protein (Fragment)                                      | 759613978  | 5.87E-06 | Getamipin_ErnicheRelatatio_OtherSubstrates | Bacteria     | Proteobacter | Betaproteobacteria | Burkholderia   | Comamonas | Varioxax |
| 115184_9  | Translation                                         | Ribosomal proteins: synthesis and modification      | 50S ribosomal protein L5                                                | 757461875  | 1.39E-13 | Getamipin_ErnicheRelatatio_OtherSubstrates | Bacteria     | Proteobacter | Betaproteobacteria | Burkholderia   | Comamonas | Varioxax |
| 15295_6   | No roles mapped of 0 KOs                            |                                                     | Uncharacterized protein                                                 | 757283365  | 3.96E-13 | Getamipin_ErnicheRelatatio_OtherSubstrates | Bacteria     | Proteobacter | Betaproteobacteria | Burkholderia   | Comamonas | Varioxax |
| 951276_5  | No roles mapped of 0 KOs                            |                                                     | Alpha 1 domain-containing protein                                       | 757484715  | 6.83E-07 | Getamipin_ErnicheRelatatio_OtherSubstrates | Bacteria     | Proteobacter | Betaproteobacteria | Burkholderia   | Comamonas | Varioxax |
| 508975_1  | Energy metabolism                                   | Oxidative phosphorylation                           | Cytochrome c ubiquinol oxidase subunit I                                | 756691309  | 1.63E-05 | Getamipin_ErnicheRelatatio_OtherSubstrates | Bacteria     | Proteobacter | Betaproteobacteria | Burkholderia   | Comamonas | Varioxax |
| 185414_4  | Energy metabolism                                   | Oxidative phosphorylation                           | Cytochrome c ubiquinol oxidase subunit I                                | 756691309  | 1.95E-11 | Getamipin_ErnicheRelatatio_OtherSubstrates | Bacteria     | Proteobacter | Betaproteobacteria | Burkholderia   | Comamonas | Varioxax |
| 29386_5   | No roles mapped of 0 KOs                            |                                                     | RM domain-containing protein                                            | 755832025  | 5.12E-05 | Getamipin_ErnicheRelatatio_OtherSubstrates | Bacteria     | Proteobacter | Betaproteobacteria | Burkholderia   | Comamonas | Varioxax |
| 400845_4  | Amino acid metabolism                               | Valine, leucine and isoleucine metabolism           | Ketol-acid reductoisomerase (NADPH+)                                    | 755975044  | 8.08E-06 | Getamipin_ErnicheRelatatio_OtherSubstrates | Bacteria     | Proteobacter | Betaproteobacteria | Burkholderia</ |           |          |









|            |                                                     |                                                     |                                                       |             |            |           |                   |                 |                                   |                |                     |                   |                  |                  |                  |                                    |                                   |
|------------|-----------------------------------------------------|-----------------------------------------------------|-------------------------------------------------------|-------------|------------|-----------|-------------------|-----------------|-----------------------------------|----------------|---------------------|-------------------|------------------|------------------|------------------|------------------------------------|-----------------------------------|
| 494843_4   | Translation                                         | Ribosomal proteins: synthesis and modification      | 30S ribosomal protein S9                              | 1.21500077  | G013609113 | Getaphium | Enriched/Relative | OtherSubstrates | Bacteria                          | Bacteroidetes  | Cytophaga           | Cytophagii        | Cytophagae       | Ohtaekawa        | Ohtaekawia       | Ohtaekawia                         | Korosis                           |
| 1612786_1  | Translation                                         | Transfer & biogenesis                               | RNAi RNAi ligase                                      | 1.215341019 | G013822026 | Getaphium | Enriched/Relative | OtherSubstrates | Bacteria                          | Bacteroidetes  | Cytophaga           | Cytophagii        | Cytophagae       |                  | Cytophaga        | Cytophaga                          | flava                             |
| 19390_3    | Nucleic acid metabolism                             | Pyrimidine                                          | CTP synthase                                          | 1.215005809 | G012721799 | Getaphium | Enriched/Relative | OtherSubstrates | Bacteria                          | Bacteroidetes  |                     |                   |                  |                  |                  |                                    | Bacteroidetes bacterium ADuB18425 |
| 1304266_6  | Transcription                                       | ADP-dependent RNA helicase DfpA                     | ADP-dependent RNA helicase DfpA                       | 1.214062632 | G013030727 | Getaphium | Enriched/Relative | OtherSubstrates | No taxonomic annotation available |                |                     |                   |                  |                  |                  |                                    |                                   |
| 931061_47  | Energy metabolism                                   | Oxidative phosphorylation                           | Oxidative phosphorylation                             | 1.18881398  | G003317668 | Getaphium | Enriched/Relative | OtherSubstrates | Bacteria                          |                |                     |                   |                  |                  |                  |                                    |                                   |
| 10428310   | Transport and binding proteins                      | Amino acids, peptides and amines                    | High-affinity choline transporter protein             | 1.213576505 | G010000814 | Getaphium | Enriched/Relative | OtherSubstrates | No taxonomic annotation available |                |                     |                   |                  |                  |                  |                                    |                                   |
| 414971_1   | No roles mapped out of 6 OKs                        | Uncharacterized protein                             | Uncharacterized protein                               | 1.213574073 | G010000811 | Getaphium | Enriched/Relative | OtherSubstrates | No taxonomic annotation available |                |                     |                   |                  |                  |                  |                                    |                                   |
| 212529_2   | Prosthetic groups, cofactors, and carriers          | Coenzyme M                                          | Phosphate coenzyme A synthase                         | 1.219552504 | G010942584 | Getaphium | Enriched/Relative | OtherSubstrates | Bacteria                          | Actinobacteria | Chloroflexi         | Nitrospirillum    | Nitrospirillum   | Nitrospirillum   | Nitrospirillum   | Candidatus Nitrospirillum gagensis |                                   |
| 367244_4   | Translation                                         | Ribosomal proteins: synthesis and modification      | 50S ribosomal protein L4                              | 1.21284832  | G012031279 | Getaphium | Enriched/Relative | OtherSubstrates | Bacteria                          | Bacteroidetes  | Cytophaga           | Cytophagii        | Cytophagae       | Ohtaekawa        | Ohtaekawia       | Korosis                            |                                   |
| 1184045_3  | No roles mapped out of 9 OKs                        | Uncharacterized protein                             | Uncharacterized protein                               | 1.214277383 | G010559162 | Getaphium | Enriched/Relative | OtherSubstrates | Bacteria                          | Bacteroidetes  | Cytophaga           | Cytophagii        | Cytophagae       |                  |                  |                                    | Thaumarchaeota bacterium 9512     |
| 122773_2   | Translation                                         | Ribosomal proteins: synthesis and modification      | 30S ribosomal protein L1                              | 1.211476759 | G010780669 | Getaphium | Enriched/Relative | OtherSubstrates | Bacteria                          | Bacteroidetes  |                     |                   |                  |                  |                  |                                    | Bacteroidetes bacterium           |
| 1110055_5  | Intracellular trafficking, assembly, and processing | Chaperone and folding catalyst                      | Chaperone protein DnaK                                | 1.211212965 | G010904953 | Getaphium | Enriched/Relative | OtherSubstrates | Bacteria                          | Bacteroidetes  |                     |                   |                  |                  |                  |                                    | Bacteroidetes bacterium           |
| 142021_1   | Nucleic acid metabolism                             | Replication, recombination, and repair              | DNA-dependent RNA polymerase                          | 1.212021193 | G012451122 | Getaphium | Enriched/Relative | OtherSubstrates | Bacteria                          | Bacteroidetes  | Actinobacteria      | Gemmatimonadetes  | Pseudomonas      | Pseudomonas      | Pseudomonadaceae |                                    | Bacteroidetes bacterium           |
| 1668731_4  | Translation                                         | Ribosomal proteins: synthesis and modification      | 30S ribosomal protein S12                             | 1.21071133  | G012479221 | Getaphium | Enriched/Relative | OtherSubstrates | No taxonomic annotation available |                |                     |                   |                  |                  |                  |                                    |                                   |
| 206576_9   | Carbohydrate metabolism                             | Ribonucleotide biosynthesis                         | Dihydroxydiphenylacetate synthase                     | 1.208402761 | G010002776 | Getaphium | Enriched/Relative | OtherSubstrates | Bacteria                          | Actinobacteria | Actinobacteria      | Actinobacteriales | Actinobacteria   | Actinobacteria   | Actinobacteria   | Actinobacteria                     | Bacteria                          |
| 110427_46  | Transport and binding proteins                      | Proton-coupled co-receptor                          | Proton-coupled co-receptor                            | 1.208402759 | G010002775 | Getaphium | Enriched/Relative | OtherSubstrates | Bacteria                          | Bacteroidetes  | Actinobacteria      | Actinobacteriales | Actinobacteria   | Actinobacteria   | Actinobacteria   | Actinobacteria                     | Actinobacteria                    |
| 1513701_4  | Translation                                         | Ribosomal proteins: synthesis and modification      | 50S ribosomal protein S10                             | 1.208182628 | G010967128 | Getaphium | Enriched/Relative | OtherSubstrates | Bacteria                          | Bacteroidetes  | Cytophaga           | Cytophagii        | Cytophagae       | Ohtaekawa        | Ohtaekawia       | Korosis                            |                                   |
| 897925_3   | Intracellular trafficking, assembly, and processing | Intracellular trafficking, assembly, and processing | Acetyltransferase 1                                   | 1.207852286 | G010498282 | Getaphium | Enriched/Relative | OtherSubstrates | Bacteria                          | Bacteroidetes  | Cytophaga           | Cytophagii        | Cytophagae       | Ohtaekawa        | Ohtaekawia       | Korosis                            |                                   |
| 151144_3   | Carbohydrate metabolism                             | Pyruvate metabolism                                 | Acetyltransferase component of pyruvate dehydrogenase | 1.208149397 | G010304103 | Getaphium | Enriched/Relative | OtherSubstrates | Bacteria                          | Bacteroidetes  | Cytophaga           | Cytophagii        | Cytophagae       | Ohtaekawa        | Ohtaekawia       | Korosis                            |                                   |
| 14722_2    | Transcription                                       | Ribosomal proteins: synthesis and modification      | RNA-binding transcriptional activator protein         | 1.207871954 | G010808995 | Getaphium | Enriched/Relative | OtherSubstrates | Bacteria                          | Bacteroidetes  | Chloroflexi         | Chloroflexii      | Chloroflexiales  | Chloroflexiales  | Chloroflexiales  | Chloroflexiales                    | Chloroflexiales                   |
| 299401_3   | Transcription                                       | Ribosomal proteins: synthesis and modification      | 50S ribosomal protein L4                              | 1.207633008 | G010426189 | Getaphium | Enriched/Relative | OtherSubstrates | Bacteria                          | Bacteroidetes  | Actinobacteria      | Actinobacteriales | Actinobacteria   | Actinobacteria   | Actinobacteria   | Actinobacteria                     | Actinobacteria                    |
| 324943_1   | No roles mapped out of 9 OKs                        | Ribosomal proteins: synthesis and modification      | 30S ribosomal protein S9                              | 1.207610808 | G010426189 | Getaphium | Enriched/Relative | OtherSubstrates | Bacteria                          | Bacteroidetes  | Actinobacteria      | Actinobacteriales | Actinobacteria   | Actinobacteria   | Actinobacteria   | Actinobacteria                     | Actinobacteria                    |
| 951992_1   | Translation                                         | Prosthetic groups, cofactors, and carriers          | Phylogenetic protein P2                               | 1.207616875 | G010426189 | Getaphium | Enriched/Relative | OtherSubstrates | Bacteria                          | Bacteroidetes  | Chloroflexi         | Chloroflexii      | Chloroflexiales  | Chloroflexiales  | Chloroflexiales  | Chloroflexiales                    | Chloroflexiales                   |
| 1913185_2  | Prosthetic groups, cofactors, and carriers          | Ribosomal proteins: synthesis and modification      | Ribosomal protein P0                                  | 1.207616875 | G010426189 | Getaphium | Enriched/Relative | OtherSubstrates | Bacteria                          | Bacteroidetes  | Chloroflexi         | Chloroflexii      | Chloroflexiales  | Chloroflexiales  | Chloroflexiales  | Chloroflexiales                    | Chloroflexiales                   |
| 897198_1   | No roles mapped out of 1 OKs                        | Chaperone and folding catalyst                      | Carboxin carbonation factor X                         | 1.207648643 | G010393795 | Getaphium | Enriched/Relative | OtherSubstrates | No taxonomic annotation available |                |                     |                   |                  |                  |                  |                                    |                                   |
| 1154207_22 | Intracellular trafficking, assembly, and processing | Chaperone and folding catalyst                      | NADPH-dependent oxidoreductase                        | 1.207648643 | G010393795 | Getaphium | Enriched/Relative | OtherSubstrates | Bacteria                          | Bacteroidetes  | Chloroflexi         | Chloroflexii      | Chloroflexiales  | Chloroflexiales  | Chloroflexiales  | Chloroflexiales                    | Chloroflexiales                   |
| 189031_6   | Amino acid metabolism                               | Glycine, serine and threonine metabolism            | NAD/NADP-dependent betaine aldehyde dehydrogenase     | 1.205744149 | G012244064 | Getaphium | Enriched/Relative | OtherSubstrates | No taxonomic annotation available |                |                     |                   |                  |                  |                  |                                    |                                   |
| 1411369_2  | Carbohydrate metabolism                             | Alanine, aspartate and glutamate metabolism         | Transketolase                                         | 1.205440997 | G013697179 | Getaphium | Enriched/Relative | OtherSubstrates | Bacteria                          | Cyanobacteria  | Nitrospirillum      | Nitrospirillum    | Nitrospirillum   | Nitrospirillum   | Nitrospirillum   | Nitrospirillum                     | Nitrospirillum                    |
| 297963_1   | Transcription                                       | Prosthetic groups, cofactors, and carriers          | NAD(P)-dependent alcohol dehydrogenase                | 1.205410214 | G013697179 | Getaphium | Enriched/Relative | OtherSubstrates | Bacteria                          | Bacteroidetes  | Actinobacteria      | Actinobacteriales | Actinobacteria   | Actinobacteria   | Actinobacteria   | Actinobacteria                     | Actinobacteria                    |
| 1624440_2  | Amino acid metabolism                               | Alanine, aspartate and glutamate metabolism         | Glyoxylate oxidase-like protein                       | 1.204140929 | G01251108  | Getaphium | Enriched/Relative | OtherSubstrates | Bacteria                          | Bacteroidetes  | Cytophaga           | Cytophagii        | Cytophagae       |                  |                  |                                    |                                   |
| 1044630_3  | Cell structure, growth, and death                   | Cell division                                       | Cell division protein FtsZ                            | 1.204206313 | G012077208 | Getaphium | Enriched/Relative | OtherSubstrates | Bacteria                          | Bacteroidetes  | Gammaproteobacteria | Pseudomonas       | Pseudomonas      | Pseudomonas      | Pseudomonas      | Pseudomonas                        | Pseudomonas                       |
| 1046661_11 | Transcription                                       | Ribosomal proteins: synthesis and modification      | 50S ribosomal protein L1                              | 1.204206313 | G012077208 | Getaphium | Enriched/Relative | OtherSubstrates | Bacteria                          | Bacteroidetes  | Gammaproteobacteria | Pseudomonas       | Pseudomonas      | Pseudomonas      | Pseudomonas      | Pseudomonas                        | Pseudomonas                       |
| 1047876_3  | Cell structure, growth, and death                   | Proton-ATPase                                       | DnaJ 2807 domain-containing protein                   | 1.201116096 | G010113362 | Getaphium | Enriched/Relative | OtherSubstrates | Bacteria                          | Bacteroidetes  | Cytophaga           | Cytophagii        | Cytophagae       |                  |                  |                                    | Flavobacterium caeni              |
| 1420096_9  | Amino acid metabolism                               | Chaperone and folding catalyst                      | Protein disulfide isomerase                           | 1.201116096 | G010113362 | Getaphium | Enriched/Relative | OtherSubstrates | Bacteria                          | Bacteroidetes  | Cytophaga           | Cytophagii        | Cytophagae       |                  |                  |                                    | Cytophaga                         |
| 601348_5   | Intracellular trafficking, assembly, and processing | Protein modification and repair                     | Apoptosis inhibitor 1                                 | 1.204935468 | G010251471 | Getaphium | Enriched/Relative | OtherSubstrates | Bacteria                          | Bacteroidetes  |                     |                   |                  |                  |                  |                                    | Bacteroidetes bacterium ADuB18097 |
| 109728_9   | Transcription                                       | Transcription factors                               | Elongation factor G                                   | 1.202440441 | G010676025 | Getaphium | Enriched/Relative | OtherSubstrates | Bacteria                          | Bacteroidetes  |                     |                   |                  |                  |                  |                                    | Bacteroidetes bacterium           |
| 92436_4    | No roles mapped out of 4 OKs                        | Transcription factors                               | Longing endonuclease (Fragment)                       | 1.202687055 | G010676025 | Getaphium | Enriched/Relative | OtherSubstrates | Bacteria                          | Bacteroidetes  |                     |                   |                  |                  |                  |                                    |                                   |
| 549790_7   | Intracellular trafficking, assembly, and processing | Chaperone and folding catalyst                      | 60 kDa chaperonin                                     | 1.201035842 | G010387243 | Getaphium | Enriched/Relative | OtherSubstrates | Bacteria                          | Bacteroidetes  |                     |                   |                  |                  |                  |                                    |                                   |
| 1042745_18 | Transcription                                       | Ribosomal proteins: synthesis and modification      | Ribosomal protein L11A                                | 1.200741725 | G010236762 | Getaphium | Enriched/Relative | OtherSubstrates | No taxonomic annotation available |                |                     |                   |                  |                  |                  |                                    |                                   |
| 1448820_10 | Glycan biosynthesis and metabolism                  | UDP-N-acetylglucosamine glycosylase                 | UDP-N-acetylglucosamine glycosylase                   | 1.200814225 | G010486287 | Getaphium | Enriched/Relative | OtherSubstrates | Bacteria                          | Bacteroidetes  | Cytophaga           | Cytophagii        | Cytophagae       |                  |                  |                                    | Cytophaga                         |
| 1139099_4  | Energy metabolism                                   | ADP-dependent phosphorylation                       | ATP synthase subunit beta                             | 1.196223586 | G010451338 | Getaphium | Enriched/Relative | OtherSubstrates | Bacteria                          | Bacteroidetes  |                     |                   |                  |                  |                  |                                    |                                   |
| 127812_2   | Transcription                                       | ADP-dependent phosphorylation                       | RNA-directed RNA polymerase subunit beta'             | 1.192578007 | G010451338 | Getaphium | Enriched/Relative | OtherSubstrates | Bacteria                          | Bacteroidetes  |                     |                   |                  |                  |                  |                                    |                                   |
| 106850_16  | Amino acid metabolism                               | Histidine metabolism                                | Formin-nucleation domain                              | 1.198112623 | G012617106 | Getaphium | Enriched/Relative | OtherSubstrates | Bacteria                          | Bacteroidetes  | Gammaproteobacteria | Pseudomonas       | Pseudomonas      | Pseudomonadaceae |                  |                                    | Bacteroidetes bacterium           |
| 104022_3   | Amino acid metabolism                               | Valine, leucine and isoleucine metabolism           | Threonine dehydratase                                 | 1.197811766 | G010473194 | Getaphium | Enriched/Relative | OtherSubstrates | Bacteria                          | Bacteroidetes  | Cytophaga           | Cytophagii        | Cytophagae       |                  |                  |                                    |                                   |
| 160023_1   | Energy metabolism                                   | Glycolysis                                          | RNA-directed RNA polymerase subunit beta'             | 1.197238114 | G012617106 | Getaphium | Enriched/Relative | OtherSubstrates | Bacteria                          | Bacteroidetes  | Cytophaga           | Cytophagii        | Cytophagae       |                  |                  |                                    |                                   |
| 160208_2   | Transcription                                       | Chaperone and folding catalyst                      | DNA-directed RNA polymerase subunit beta'             | 1.197238114 | G012617106 | Getaphium | Enriched/Relative | OtherSubstrates | Bacteria                          | Bacteroidetes  | Cytophaga           | Cytophagii        | Cytophagae       |                  |                  |                                    |                                   |
| 43384_8    | Intracellular trafficking, assembly, and processing | Chaperone and folding catalyst                      | Chaperone protein Hsp70                               | 1.197473615 | G010808304 | Getaphium | Enriched/Relative | OtherSubstrates | Bacteria                          | Bacteroidetes  | Cytophaga           | Cytophagii        | Cytophagae       |                  |                  |                                    |                                   |
| 100213_3   | Unknown function                                    | ATPase                                              | ATPase                                                | 1.196393134 | G010209194 | Getaphium | Enriched/Relative | OtherSubstrates | Bacteria                          | Bacteroidetes  | Firmicutes          | Clostridia        | Clostridiales    | Petropaccoc      | Candidatus       | Candidatus                         | Desulfohalobium sp.               |
| 1043116_3  | Signal transduction                                 | Two-component systems                               | Phosphate regulator sensor protein PflK               | 1.198221379 | G010209194 | Getaphium | Enriched/Relative | OtherSubstrates | No taxonomic annotation available |                |                     |                   |                  |                  |                  |                                    |                                   |
| 427466_2   | Energy metabolism                                   | Pyruvate metabolism                                 | RNA-directed RNA polymerase subunit beta'             | 1.201525959 | G010387243 | Getaphium | Enriched/Relative | OtherSubstrates | Bacteria                          | Bacteroidetes  | Cytophaga           | Cytophagii        | Cytophagae       |                  |                  |                                    | Cytophaga flava                   |
| 24096_3    | No roles mapped out of 4 OKs                        | Transcription factors                               | DF1457 domain-containing protein                      | 1.19757242  | G010403958 | Getaphium | Enriched/Relative | OtherSubstrates | Bacteria                          | Bacteroidetes  | Cytophaga           | Cytophagii        | Cytophagae       | Spimosina        | Spimosina        | sp. ICTC 42546                     |                                   |
| 360717_17  | Nucleic acid metabolism                             | Replication, recombination, and repair              | DnaC                                                  | 1.195493605 | G010486287 | Getaphium | Enriched/Relative | OtherSubstrates | Bacteria                          | Bacteroidetes  | Cytophaga           | Cytophagii        | Cytophagae       | Spimosina        | Spimosina        | sp. ICTC 42546                     |                                   |
| 551409_1   | No roles mapped out of 4 OKs                        | Ribosomal proteins: synthesis and modification      | 50S ribosomal protein L2                              | 1.195118259 | G010393795 | Getaphium | Enriched/Relative | OtherSubstrates | Bacteria                          | Bacteroidetes  | Cytophaga           | Cytophagii        | Cytophagae       |                  |                  |                                    | Cytophaga flava                   |
| 1711813_9  | Translation                                         | Ribosomal proteins: synthesis and modification      | 50S ribosomal protein L4                              | 1.195290717 | G010393795 | Getaphium | Enriched/Relative | OtherSubstrates | Bacteria                          | Bacteroidetes  | Cytophaga           | Cytophagii        | Cytophagae       | Ohtaekawa        | Ohtaekawia       | Korosis                            |                                   |
| 897176_1   | Translation                                         | Ribosomal proteins: synthesis and modification      | 30S ribosomal protein S8                              | 1.195178839 | G010122480 | Getaphium | Enriched/Relative | OtherSubstrates | Bacteria                          | Bacteroidetes  | Chloroflexi         | Chloroflexii      | Chloroflexiales  | Chloroflexiales  | Chloroflexiales  | Chloroflexiales                    | Chloroflexiales                   |
| 1172805_6  | Prosthetic groups, cofactors, and carriers          | Ribosomal proteins: synthesis and modification      | 50S ribosomal protein L2                              | 1.195178839 | G010122480 | Getaphium | Enriched/Relative | OtherSubstrates | Bacteria                          | Bacteroidetes  | Chloroflexi         | Chloroflexii      | Chloroflexiales  | Chloroflexiales  | Chloroflexiales  | Chloroflexiales                    | Chloroflexiales                   |
| 131882_1   | Translation                                         | Ribosomal proteins: synthesis and modification      | 30S ribosomal protein S1                              | 1.194437335 | G010302803 | Getaphium | Enriched/Relative | OtherSubstrates | Bacteria                          | Bacteroidetes  |                     |                   |                  |                  |                  |                                    | Bacteroidetes bacterium           |
| 106529_24  | Energy metabolism                                   | Oxidative phosphorylation                           | ATP synthase subunit beta                             | 1.193254969 | G010302803 | Getaphium | Enriched/Relative | OtherSubstrates | Bacteria                          | Bacteroidetes  |                     |                   |                  |                  |                  |                                    | Bacteroidetes bacterium           |
| 1114640_4  | Nucleic acid metabolism                             | Purine metabolism                                   | ATP synthase subunit beta                             | 1.193254969 | G010302803 | Getaphium | Enriched/Relative | OtherSubstrates | Bacteria                          | Bacteroidetes  |                     |                   |                  |                  |                  |                                    | Bacteroidetes bacterium           |
| 61774_10   | Defense and invasion systems                        | Defensin and inactivation                           | Allyl hydroxylase reductase subunit C11e protein      | 1.192446946 | G010393795 | Getaphium | Enriched/Relative | OtherSubstrates | No taxonomic annotation available |                |                     |                   |                  |                  |                  |                                    |                                   |
| 187525_1   | Nucleic acid metabolism                             | Purine metabolism                                   | 5-Phosphoribosylglycine synthase                      | 1.192320031 | G010393795 | Getaphium | Enriched/Relative | OtherSubstrates | Bacteria                          | Bacteroidetes  | Gammaproteobacteria | Pseudomonas       | Pseudomonas      | Pseudomonas      | Pseudomonas      | Pseudomonas                        | Pseudomonas                       |
| 1858030_4  | Energy metabolism                                   | ADP-dependent phosphorylation                       | ATP synthase gamma chain                              | 1.191799223 | G010393795 | Getaphium | Enriched/Relative | OtherSubstrates | Bacteria                          | Bacteroidetes  | Cytophaga           | Cytophagii        | Cytophagae       | Ohtaekawa        | Ohtaekawia       | Korosis                            |                                   |
| 296331_8   | Fatty acid and lipid metabolism                     | Biohydrogen                                         | 3-hydroxyacyl-CoA synthase                            | 1.191641221 | G010008046 | Getaphium | Enriched/Relative | OtherSubstrates | Bacteria                          | Bacteroidetes  | Cytophaga           | Cytophagii        | Cytophagae       |                  |                  |                                    |                                   |
| 62585_14   | Amino acid metabolism                               | Phenylalanine, tyrosine and tryptophan biosynthesis | Phenylalanine hydroxylase                             | 1.191641221 | G010008046 | Getaphium | Enriched/Relative | OtherSubstrates | Bacteria                          | Bacteroidetes  | Cytophaga           | Cytophagii        | Cytophagae       |                  |                  |                                    | Cytophaga                         |
| 191887_14  | Intracellular trafficking, assembly, and processing | Chaperone and folding catalyst                      | 60 kDa chaperonin                                     | 1.190977934 | G010409524 | Getaphium | Enriched/Relative | OtherSubstrates | Bacteria                          | Bacteroidetes  | Cytophaga           | Cytophagii        | Cytophagae       |                  |                  |                                    | Cytophaga                         |
| 724616_9   | No roles mapped out of 5 OKs                        | Chaperone and folding catalyst                      | Uncharacterized protein                               | 1.190964021 | G010409524 | Getaphium | Enriched/Relative | OtherSubstrates | Bacteria                          | Bacteroidetes  | Cytophaga           | Cytophagii        | Cytophagae       |                  |                  |                                    | Cytophaga                         |
| 148807_3   | No roles mapped out of 1 OKs                        | Transport and binding proteins                      | MuA-like ATPase                                       | 1.190231449 | G010436459 | Getaphium | Enriched/Relative | OtherSubstrates | Bacteria                          | Bacteroidetes  | Gammaproteobacteria | Pseudomonas       | Pseudomonadaceae |                  |                  |                                    | Pseudomonas                       |
| 123957_2   | Transport and binding proteins                      | Chaperone and folding catalyst                      | DF1520 domain-containing protein                      | 1.190544091 | G010741704 | Getaphium | Enriched/Relative | OtherSubstrates | Bacteria                          | Bacteroidetes  | Cytophaga           | Cytophagii        | Cytophagae       | Ohtaekawa        | Ohtaekawia       | Korosis                            |                                   |
| 74278_4    | Nucleic acid metabolism                             | Replication, recombination, and repair              | Topo IV A subunit (topoisomerase)                     | 1.189777968 | G010483283 | Getaphium | Enriched/Relative | OtherSubstrates | Bacteria                          | Bacteroidetes  | Chloroflexi         | Chloroflexii      | Chloroflexiales  | Chloroflexiales  | Chloroflexiales  | Chloroflexiales                    | Chloroflexiales                   |
| 141412_7   | Translation                                         | Transcription factors                               | Elongation factor Tu                                  | 1.18938041  | G010614958 | Getaphium | Enriched/Relative | OtherSubstrates | Bacteria                          | Bacteroidetes  | Cytophaga           | Cytophagii        | Cytophagae       |                  |                  |                                    | Cytophaga flava                   |
| 1819925_2  | No roles mapped out of 9 OKs                        | Secreted factors                                    | Serine/threonine protein kinase                       | 1.189524721 | G010486287 | Getaphium | Enriched/Relative | OtherSubstrates | Bacteria                          | Bacteroidetes  | Gammaproteobacteria | Neisseriales      | Sinobacter       | Sinobacter       | Sinobacter       | Sinobacter                         | Sinobacter                        |
| 107085_12  | Defense and invasion systems                        | Phage and phage-like                                | Phage and phage-like protein CstC                     | 1.189888881 | G010614958 | Getaphium | Enriched/Relative | OtherSubstrates | Bacteria                          | Bacteroidetes  | Actinobacteria      | Actinobacteriales |                  |                  |                  |                                    |                                   |
