# Supplementary material
Source: PubMed Central journal article supplement (PMC7343995)
Supplement: mBio.01349-20-st008.pdf [file mBio.01349-20-st008.pdf]

**Supplemental Table 1:** List of significantly enriched transcripts in polyphosphates modulators ('Ypsi' and 'Pectin') relative to simple substrates ('Xylose' and 'NAG') models. The 'Glucanase' models were excluded from this analysis. The function 'results' from the DESeq2 package was used on the (DESeq) data object to determine enrichment. 'Polyphosphate' vs. 'SimpleSubstrate' models, where the 6 replicates for each (i.e. 3 Xylose + 3 NAG) were pooled for each comparison. Transcripts that had a significant (adjusted p-value < 0.05) log2(FoldChange) value greater than 1 or less than -1 were retained. KEGG and UniProt annotations (including taxonomic information) were then added for transcripts that had a match to one or both databases. Results are sorted by the average |log2(FoldChange)| to determine which transcripts were most consistently highly enriched (log2(FoldChange > 1) or log2(FoldChange < -1) in polyphosphates). Note: transcripts with more than one KEGG hit have only the first hit listed.

| Transcript | KEGG Category                                       | KEGG Pathway                                   | UniProt Name                                         | log2(FoldChange) | adjusted p-value | Enrichment | Domain  | Phylum        | Class       | Order           | Family           | Genus          | Species  |
|------------|-----------------------------------------------------|------------------------------------------------|------------------------------------------------------|------------------|------------------|------------|---------|---------------|-------------|-----------------|------------------|----------------|----------|
| 176052_2   | Cyan biosynthesis                                   | Phenylalanine and tyrosine metabolism          | 4-β-glucosyl-L-phenylalanine                         | 4.819797         | 1.32E-10         | Positive   | PF01093 | Bacteroidetes | Chloroflexi | Chloroflexiales | Flavobacteriales | Flavobacterium | str. XT7 |
| 176183_1   | No hits mapped out of 4 KOs                         |                                                | Not in UniProt                                       | 14.217541        | 1.01E-16         | Positive   | PF01093 | Bacteroidetes | Chloroflexi | Chloroflexiales | Flavobacteriales | Flavobacterium | str. XT7 |
| 176183_1   | Transcription                                       | Transcription factors                          | DNA-directed RNA polymerase subunit beta             | 14.000961        | 1.56E-16         | Positive   | PF01093 | Bacteroidetes | Chloroflexi | Chloroflexiales | Flavobacteriales | Flavobacterium | str. XT7 |
| 356336_6   | No hits mapped out of 4 KOs                         |                                                | Not in UniProt                                       | 13.874841        | 1.10E-15         | Positive   | PF01093 | Bacteroidetes | Chloroflexi | Chloroflexiales | Flavobacteriales | Flavobacterium | str. XT7 |
| 176115_7   | Intracellular trafficking, assembly, and processing | Peptidases                                     | Proteinase subtilisin-like serine protease           | 13.764027        | 5.85E-15         | Positive   | PF01093 | Bacteroidetes | Chloroflexi | Chloroflexiales | Flavobacteriales | Flavobacterium | str. XT7 |
| 177011_7   | No hits mapped out of 4 KOs                         |                                                | Uncharacterized protein                              | 13.712126        | 2.23E-10         | Positive   | PF01093 | Bacteroidetes | Chloroflexi | Chloroflexiales | Flavobacteriales | Flavobacterium | str. XT7 |
| 91239_1    | No hits mapped out of 4 KOs                         |                                                | Uncharacterized protein                              | 13.679489        | 2.41E-11         | Positive   | PF01093 | Bacteroidetes | Chloroflexi | Chloroflexiales | Flavobacteriales | Flavobacterium | str. XT7 |
| 181440_25  | No hits mapped out of 4 KOs                         |                                                | Uncharacterized protein                              | 13.599051        | 1.31E-11         | Positive   | PF01093 | Bacteroidetes | Chloroflexi | Chloroflexiales | Flavobacteriales | Flavobacterium | str. XT7 |
| 176122_3   | Transport and binding proteins                      | Amino acids, peptides and amines               | SAP, 5', domain-containing protein                   | 13.579633        | 3.17E-10         | Positive   | PF01093 | Bacteroidetes | Chloroflexi | Chloroflexiales | Flavobacteriales | Flavobacterium | str. XT7 |
| 347465_3   | No hits mapped out of 4 KOs                         |                                                | Uncharacterized protein                              | 13.508364        | 2.43E-12         | Positive   | PF01093 | Bacteroidetes | Chloroflexi | Chloroflexiales | Flavobacteriales | Flavobacterium | str. XT7 |
| 180444_7   | Prosthetic group, cofactors, and carriers           | Folate biosynthesis                            | 5,6,7,8-tetrahydrofolate synthase                    | 13.461258        | 9.93E-10         | Positive   | PF01093 | Bacteroidetes | Chloroflexi | Chloroflexiales | Flavobacteriales | Flavobacterium | str. XT7 |
| 180527_3   | No hits mapped out of 4 KOs                         |                                                | Uncharacterized protein                              | 13.427173        | 3.17E-11         | Positive   | PF01093 | Bacteroidetes | Chloroflexi | Chloroflexiales | Flavobacteriales | Flavobacterium | str. XT7 |
| 180519_9   | No hits mapped out of 4 KOs                         |                                                | Uncharacterized protein                              | 13.425283        | 4.85E-11         | Positive   | PF01093 | Bacteroidetes | Chloroflexi | Chloroflexiales | Flavobacteriales | Flavobacterium | str. XT7 |
| 110372_3   | Translation                                         | Ribosomal proteins: synthesis and modification | 30S ribosomal protein S10                            | 13.313781        | 1.07E-15         | Positive   | PF01093 | Bacteroidetes | Chloroflexi | Chloroflexiales | Flavobacteriales | Flavobacterium | str. XT7 |
| 356687_2   | Translation                                         | Translation factors                            | Elongation factor Tu                                 | 13.308841        | 2.34E-15         | Positive   | PF01093 | Bacteroidetes | Chloroflexi | Chloroflexiales | Flavobacteriales | Flavobacterium | str. XT7 |
| 156488_4   | No hits mapped out of 4 KOs                         |                                                | Uncharacterized protein                              | 13.273586        | 2.88E-18         | Positive   | PF01093 | Bacteroidetes | Chloroflexi | Chloroflexiales | Flavobacteriales | Flavobacterium | str. XT7 |
| 200436_3   | No hits mapped out of 4 KOs                         |                                                | Uncharacterized protein                              | 13.200972        | 1.55E-11         | Positive   | PF01093 | Bacteroidetes | Chloroflexi | Chloroflexiales | Flavobacteriales | Flavobacterium | str. XT7 |
| 76789_18   | Transcription                                       | Transcription factors                          | Cold shock protein                                   | 13.093101        | 6.00E-16         | Positive   | PF01093 | Bacteroidetes | Chloroflexi | Chloroflexiales | Flavobacteriales | Flavobacterium | str. XT7 |
| 204345_13  | Carbohydrate metabolism                             | Citrate cycle (TCA cycle)                      | Citrate synthase                                     | 13.018066        | 1.83E-16         | Positive   | PF01093 | Bacteroidetes | Chloroflexi | Chloroflexiales | Flavobacteriales | Flavobacterium | str. XT7 |
| 43530_3    | Transport and binding proteins                      | Peritrichous flagella                          | Peritrichous flagellin (Flagment)                    | 13.018066        | 1.83E-16         | Positive   | PF01093 | Bacteroidetes | Chloroflexi | Chloroflexiales | Flavobacteriales | Flavobacterium | str. XT7 |
| 162482_8   | No hits mapped out of 4 KOs                         |                                                | Uncharacterized protein                              | 13.018066        | 1.83E-16         | Positive   | PF01093 | Bacteroidetes | Chloroflexi | Chloroflexiales | Flavobacteriales | Flavobacterium | str. XT7 |
| 413711_3   | No hits mapped out of 4 KOs                         |                                                | Uncharacterized protein                              | 13.018066        | 1.83E-16         | Positive   | PF01093 | Bacteroidetes | Chloroflexi | Chloroflexiales | Flavobacteriales | Flavobacterium | str. XT7 |
| 1074415_1  | Intracellular trafficking, assembly, and processing | Protein export, secretion, and sorting         | Protein translocase subunit SecY                     | 13.040309        | 1.23E-18         | Positive   | PF01093 | Bacteroidetes | Chloroflexi | Chloroflexiales | Flavobacteriales | Flavobacterium | str. XT7 |
| 171825_2   | No hits mapped out of 4 KOs                         |                                                | Uncharacterized protein                              | 13.024326        | 9.83E-14         | Positive   | PF01093 | Bacteroidetes | Chloroflexi | Chloroflexiales | Flavobacteriales | Flavobacterium | str. XT7 |
| 1754050_5  | Translation                                         | Ribosomal proteins: synthesis and modification | 30S ribosomal protein S1                             | 13.023275        | 8.11E-19         | Positive   | PF01093 | Bacteroidetes | Chloroflexi | Chloroflexiales | Flavobacteriales | Flavobacterium | str. XT7 |
| 390311_7   | No hits mapped out of 4 KOs                         |                                                | Uncharacterized protein                              | 13.023275        | 8.11E-19         | Positive   | PF01093 | Bacteroidetes | Chloroflexi | Chloroflexiales | Flavobacteriales | Flavobacterium | str. XT7 |
| 71371_7    | Translation                                         | Translation factors                            | Elongation factor Tu                                 | 13.023275        | 8.11E-19         | Positive   | PF01093 | Bacteroidetes | Chloroflexi | Chloroflexiales | Flavobacteriales | Flavobacterium | str. XT7 |
| 781051_4   | Translation                                         | Ribosomal proteins: synthesis and modification | 30S ribosomal protein S16                            | 13.023275        | 8.11E-19         | Positive   | PF01093 | Bacteroidetes | Chloroflexi | Chloroflexiales | Flavobacteriales | Flavobacterium | str. XT7 |
| 300020_2   | No hits mapped out of 4 KOs                         |                                                | Uncharacterized protein                              | 13.023275        | 8.11E-19         | Positive   | PF01093 | Bacteroidetes | Chloroflexi | Chloroflexiales | Flavobacteriales | Flavobacterium | str. XT7 |
| 107839_2   | Energy metabolism                                   | Oxidative phosphorylation                      | ATP synthase subunit b6                              | 13.017874        | 2.38E-11         | Positive   | PF01093 | Bacteroidetes | Chloroflexi | Chloroflexiales | Flavobacteriales | Flavobacterium | str. XT7 |
| 813382_1   | Translation                                         | Transfer RNAs                                  | Glutamate-tRNA ligase                                | 13.017874        | 2.38E-11         | Positive   | PF01093 | Bacteroidetes | Chloroflexi | Chloroflexiales | Flavobacteriales | Flavobacterium | str. XT7 |
| 1005175_3  | Translation                                         | Transfer factors                               | Elongation factor Tu                                 | 13.017874        | 2.38E-11         | Positive   | PF01093 | Bacteroidetes | Chloroflexi | Chloroflexiales | Flavobacteriales | Flavobacterium | str. XT7 |
| 1101017_2  | No hits mapped out of 4 KOs                         |                                                | Uncharacterized protein                              | 13.017874        | 2.38E-11         | Positive   | PF01093 | Bacteroidetes | Chloroflexi | Chloroflexiales | Flavobacteriales | Flavobacterium | str. XT7 |
| 160683_8   | Nucleic acid metabolism                             | Pyrimidine metabolism                          | UMP decarboxylase                                    | 13.017874        | 2.38E-11         | Positive   | PF01093 | Bacteroidetes | Chloroflexi | Chloroflexiales | Flavobacteriales | Flavobacterium | str. XT7 |
| 712723_11  | Carbohydrate metabolism                             | Glycolysis / Gluconeogenesis                   | Phosphoenolpyruvate carboxylase                      | 13.017874        | 2.38E-11         | Positive   | PF01093 | Bacteroidetes | Chloroflexi | Chloroflexiales | Flavobacteriales | Flavobacterium | str. XT7 |
| 1005175_3  | Translation                                         | Transfer factors                               | Elongation factor Tu                                 | 13.017874        | 2.38E-11         | Positive   | PF01093 | Bacteroidetes | Chloroflexi | Chloroflexiales | Flavobacteriales | Flavobacterium | str. XT7 |
| 728033_2   | Amino acid metabolism                               | Protein synthesis and tyrosine biosynthesis    | Phenylalanine hydroxylase                            | 13.017874        | 2.38E-11         | Positive   | PF01093 | Bacteroidetes | Chloroflexi | Chloroflexiales | Flavobacteriales | Flavobacterium | str. XT7 |
| 1056877_27 | Translation                                         | Transfer factors                               | Elongation factor Tu                                 | 13.017874        | 2.38E-11         | Positive   | PF01093 | Bacteroidetes | Chloroflexi | Chloroflexiales | Flavobacteriales | Flavobacterium | str. XT7 |
| 202111_3   | Transcription                                       | RNA polymerase                                 | DNA-directed RNA polymerase subunit beta             | 13.017874        | 2.38E-11         | Positive   | PF01093 | Bacteroidetes | Chloroflexi | Chloroflexiales | Flavobacteriales | Flavobacterium | str. XT7 |
| 814524_166 | Unknown function                                    | Enzymes of unknown specificity                 | Uncharacterized protein                              | 13.017874        | 2.38E-11         | Positive   | PF01093 | Bacteroidetes | Chloroflexi | Chloroflexiales | Flavobacteriales | Flavobacterium | str. XT7 |
| 1215396_6  | Carbohydrate metabolism                             | Protein synthesis and tyrosine biosynthesis    | Phenylalanine hydroxylase                            | 13.017874        | 2.38E-11         | Positive   | PF01093 | Bacteroidetes | Chloroflexi | Chloroflexiales | Flavobacteriales | Flavobacterium | str. XT7 |
| 1434751_11 | Defense and invasion systems                        | Detoxification and inactivation                | β-glucuronidase                                      | 13.017874        | 2.38E-11         | Positive   | PF01093 | Bacteroidetes | Chloroflexi | Chloroflexiales | Flavobacteriales | Flavobacterium | str. XT7 |
| 1437966_2  | Translation                                         | Transfer factors                               | Elongation factor Tu                                 | 13.017874        | 2.38E-11         | Positive   | PF01093 | Bacteroidetes | Chloroflexi | Chloroflexiales | Flavobacteriales | Flavobacterium | str. XT7 |
| 82106_3    | Translation                                         | Ribosomal proteins: synthesis and modification | 30S ribosomal protein L2                             | 13.017874        | 2.38E-11         | Positive   | PF01093 | Bacteroidetes | Chloroflexi | Chloroflexiales | Flavobacteriales | Flavobacterium | str. XT7 |
| 168126_2   | Energy metabolism                                   | Oxidative phosphorylation                      | ATP synthase subunit a6                              | 13.017874        | 2.38E-11         | Positive   | PF01093 | Bacteroidetes | Chloroflexi | Chloroflexiales | Flavobacteriales | Flavobacterium | str. XT7 |
| 701127_2   | Energy metabolism                                   | Oxidative phosphorylation                      | ATP synthase subunit a6                              | 13.017874        | 2.38E-11         | Positive   | PF01093 | Bacteroidetes | Chloroflexi | Chloroflexiales | Flavobacteriales | Flavobacterium | str. XT7 |
| 107551_8   | Prosthetic group, cofactors, and carriers           | Iron sulfur clusters                           | Iron sulfur cluster assembly scaffold protein (IscU) | 13.017874        | 2.38E-11         | Positive   | PF01093 | Bacteroidetes | Chloroflexi | Chloroflexiales | Flavobacteriales | Flavobacterium | str. XT7 |
| 329481_1   | No hits mapped out of 4 KOs                         |                                                | Uncharacterized protein                              | 13.017874        | 2.38E-11         | Positive   | PF01093 | Bacteroidetes | Chloroflexi | Chloroflexiales | Flavobacteriales | Flavobacterium | str. XT7 |
| 1010820_2  | Transcription                                       | Transcription factors                          | Cold shock protein (Beta-Ribn, CspA family)          | 13.017874        | 2.38E-11         | Positive   | PF01093 | Bacteroidetes | Chloroflexi | Chloroflexiales | Flavobacteriales | Flavobacterium | str. XT7 |
| 320053_6   | Transcription                                       | Transcription factors                          | Cold shock protein (Beta-Ribn, CspA family)          | 13.017874        | 2.38E-11         | Positive   | PF01093 | Bacteroidetes | Chloroflexi | Chloroflexiales | Flavobacteriales | Flavobacterium | str. XT7 |
| 181879_29  | No hits mapped out of 4 KOs                         |                                                | Uncharacterized protein                              | 13.017874        | 2.38E-11         | Positive   | PF01093 | Bacteroidetes | Chloroflexi | Chloroflexiales | Flavobacteriales | Flavobacterium | str. XT7 |
| 762901_10  | Defense and invasion systems                        | Secreted effectors                             | Secreted effector                                    | 13.017874        | 2.38E-11         | Positive   | PF01093 | Bacteroidetes | Chloroflexi | Chloroflexiales | Flavobacteriales | Flavobacterium | str. XT7 |
| 180721_2   | Transcription                                       | Transcription factors                          | DNA-directed RNA polymerase subunit beta             | 13.017874        | 2.38E-11         | Positive   | PF01093 | Bacteroidetes | Chloroflexi | Chloroflexiales | Flavobacteriales | Flavobacterium | str. XT7 |
| 1396533_3  | Nucleic acid metabolism                             | Cell division                                  | Cell division protein FtsZ                           | 13.017874        | 2.38E-11         | Positive   | PF01093 | Bacteroidetes | Chloroflexi | Chloroflexiales | Flavobacteriales | Flavobacterium | str. XT7 |
| 105449_9   | No hits mapped out of 4 KOs                         |                                                | Uncharacterized protein                              | 13.017874        | 2.38E-11         | Positive   | PF01093 | Bacteroidetes | Chloroflexi | Chloroflexiales | Flavobacteriales | Flavobacterium | str. XT7 |
| 105449_9   | No hits mapped out of 4 KOs                         |                                                | Uncharacterized protein                              | 13.017874        | 2.38E-11         | Positive   | PF01093 | Bacteroidetes | Chloroflexi | Chloroflexiales | Flavobacteriales | Flavobacterium | str. XT7 |
| 105449_9   | No hits mapped out of 4 KOs                         |                                                | Uncharacterized protein                              | 13.017874        | 2.38E-11         | Positive   | PF01093 | Bacteroidetes | Chloroflexi | Chloroflexiales | Flavobacteriales | Flavobacterium | str. XT7 |
| 105449_9   | No hits mapped out of 4 KOs                         |                                                | Uncharacterized protein                              | 13.017874        | 2.38E-11         | Positive   | PF01093 | Bacteroidetes | Chloroflexi | Chloroflexiales | Flavobacteriales | Flavobacterium | str. XT7 |
| 105449_9   | No hits mapped out of 4 KOs                         |                                                | Uncharacterized protein                              | 13.017874        | 2.38E-11         | Positive   | PF01093 | Bacteroidetes | Chloroflexi | Chloroflexiales | Flavobacteriales | Flavobacterium | str. XT7 |
| 105449_9   | No hits mapped out of 4 KOs                         |                                                | Uncharacterized protein                              | 13.017874        | 2.38E-11         | Positive   | PF01093 | Bacteroidetes | Chloroflexi | Chloroflexiales | Flavobacteriales | Flavobacterium | str. XT7 |
| 105449_9   | No hits mapped out of 4 KOs                         |                                                | Uncharacterized protein                              | 13.017874        | 2.38E-11         | Positive   | PF01093 | Bacteroidetes | Chloroflexi | Chloroflexiales | Flavobacteriales | Flavobacterium | str. XT7 |
| 105449_9   | No hits mapped out of 4 KOs                         |                                                | Uncharacterized protein                              | 13.017874        | 2.38E-11         | Positive   | PF01093 | Bacteroidetes | Chloroflexi | Chloroflexiales | Flavobacteriales | Flavobacterium | str. XT7 |
| 105449_9   | No hits mapped out of 4 KOs                         |                                                | Uncharacterized protein                              | 13.017874        | 2.38E-11         | Positive   | PF01093 | Bacteroidetes | Chloroflexi | Chloroflexiales | Flavobacteriales | Flavobacterium | str. XT7 |
| 105449_9   | No hits mapped out of 4 KOs                         |                                                | Uncharacterized protein                              | 13.017874        | 2.38E-11         | Positive   | PF01093 | Bacteroidetes | Chloroflexi | Chloroflexiales | Flavobacteriales | Flavobacterium | str. XT7 |
| 105449_9   | No hits mapped out of 4 KOs                         |                                                | Uncharacterized protein                              | 13.017874        | 2.38E-11         | Positive   | PF01093 | Bacteroidetes | Chloroflexi | Chloroflexiales | Flavobacteriales | Flavobacterium | str. XT7 |
| 105449_9   | No hits mapped out of 4 KOs                         |                                                | Uncharacterized protein                              | 13.017874        | 2.38E-11         | Positive   | PF01093 | Bacteroidetes | Chloroflexi | Chloroflexiales | Flavobacteriales | Flavobacterium | str. XT7 |
| 105449_9   | No hits mapped out of 4 KOs                         |                                                | Uncharacterized protein                              | 13.017874        | 2.38E-11         | Positive   | PF01093 | Bacteroidetes | Chloroflexi | Chloroflexiales | Flavobacteriales | Flavobacterium | str. XT7 |
| 105449_9   | No hits mapped out of 4 KOs                         |                                                | Uncharacterized protein                              | 13.017874        | 2.38E-11         | Positive   | PF01093 | Bacteroidetes | Chloroflexi | Chloroflexiales | Flavobacteriales | Flavobacterium | str. XT7 |
| 105449_9   | No hits mapped out of 4 KOs                         |                                                | Uncharacterized protein                              | 13.017874        | 2.38E-11         | Positive   | PF01093 | Bacteroidetes | Chloroflexi | Chloroflexiales | Flavobacteriales | Flavobacterium | str. XT7 |
| 105449_9   | No hits mapped out of 4 KOs                         |                                                | Uncharacterized protein                              | 13.017874        | 2.38E-11         | Positive   | PF01093 | Bacteroidetes | Chloroflexi | Chloroflexiales | Flavobacteriales | Flavobacterium | str. XT7 |
| 105449_9   | No hits mapped out of 4 KOs                         |                                                | Uncharacterized protein                              | 13.017874        | 2.38E-11         | Positive   | PF01093 | Bacteroidetes | Chloroflexi | Chloroflexiales | Flavobacteriales | Flavobacterium | str. XT7 |
| 105449_9   | No hits mapped out of 4 KOs                         |                                                | Uncharacterized protein                              | 13.017874        | 2.38E-11         | Positive   | PF01093 | Bacteroidetes | Chloroflexi | Chloroflexiales | Flavobacteriales | Flavobacterium | str. XT7 |
| 105449_9   | No hits mapped out of 4 KOs                         |                                                | Uncharacterized protein                              | 13.017874        | 2.38E-11         | Positive   | PF01093 | Bacteroidetes | Chloroflexi | Chloroflexiales | Flavobacteriales | Flavobacterium | str      |

|           |                                                     |                                                 |                                                                |           |          |                        |                                   |                       |                               |
|-----------|-----------------------------------------------------|-------------------------------------------------|----------------------------------------------------------------|-----------|----------|------------------------|-----------------------------------|-----------------------|-------------------------------|
| 300973,4  | Amino acid metabolism                               | Cytosine and methionine metabolism              | 5-methylthioadenosyltransferase-homocysteine methyltr          | 9.7782104 | 1.38E+18 | PolysaccharideBacteria | BacteroidetesCytophaga            | Cytophagales          | Chryseoidae                   |
| 1235904,1 | Transcription                                       | Transcription factors                           | Transcription factor G, microRNA1                              | 9.7782104 | 1.38E+18 | PolysaccharideBacteria | BacteroidetesCytophaga            | Cytophagales          | Chryseoidae                   |
| 93029,2   | Transcription                                       | Transcription factors                           | RNA polymerase sigma factor R9                                 | 9.7788716 | 1.56E+20 | PolysaccharideBacteria | ProteobacteriaBetaproteobacteria  | Comamonadales         | Varonaceae                    |
| 1802828,3 | No genes mapped out of 4 KDs                        | Transcription factors                           | Molecular chaperonin subunit beta                              | 9.7808008 | 3.78E+19 | PolysaccharideBacteria | BacteroidetesCytophaga            | Cytophagales          | Chryseoidae                   |
| 52044,5   | Transcription                                       | Transcription factors                           | Elongation factor Tu                                           | 9.7908857 | 1.28E+15 | PolysaccharideBacteria | BacteroidetesCytophaga            | Cytophagales          | Chryseoidae                   |
| 1708081,1 | No genes mapped out of 4 KDs                        | Transcription factors                           | Not in_Usif                                                    | 9.7948472 | 6.88E+14 | PolysaccharideBacteria | BacteroidetesCytophaga            | Cytophagales          | Chryseoidae                   |
| 20396,5   | Cell motility and adhesion                          | Flagellar complex and associated proteins       | Flagellin                                                      | 9.8464121 | 1.12E+14 | PolysaccharideBacteria | ProteobacteriaBetaproteobacteria  | Comamonadales         | Parvomonas                    |
| 1482568,1 | Transport and binding proteins                      | Unknown substrate                               | Uncharacterized protein                                        | 9.8364716 | 1.40E+08 | PolysaccharideBacteria | Vercomicrobia                     |                       | Vercomicrobia bacterium       |
| 76351,1   | No genes mapped out of 4 KDs                        | Transcription factors                           | 3-hydroxybutyrate dehydrogenase                                | 9.8257519 | 6.52E+19 | PolysaccharideBacteria | BacteroidetesCytophaga            | Cytophagales          | Chryseoidae                   |
| 83380,3   | No genes mapped out of 4 KDs                        | Ribosomal proteins: synthesis and modification  | Hybrid sensor histidine kinase response regulator              | 9.6172005 | 3.59E+16 | PolysaccharideBacteria | BacteroidetesCytophaga            | CytophagalesCytophaga | Dyadobacter sp. AR-3-6        |
| 166428,10 | Transcription                                       | Citrate cycle (TCA cycle)                       | Isocitrate dehydrogenase                                       | 9.8061221 | 2.63E+19 | PolysaccharideBacteria | BacteroidetesCytophaga            | Cytophagales          | Chryseoidae                   |
| 31810,2   | Carbohydrate metabolism                             | Ribosomal proteins: synthesis and modification  | Isocitrate dehydrogenase [NADP]                                | 9.5964725 | 3.72E+09 | PolysaccharideBacteria | BacteroidetesCytophaga            | Cytophagales          | Chryseoidae                   |
| 16044,2   | No genes mapped out of 4 KDs                        | Ribosomal proteins: synthesis and modification  | Glyoxylate hydratase                                           | 9.5822801 | 2.07E+10 | PolysaccharideBacteria | ActinobacteriaActinobacteriales   | Frankiales            | MotifactorMotifactor          |
| 1743114,7 | No genes mapped out of 4 KDs                        | Ribosomal proteins: synthesis and modification  | Nucleoside diphosphate containing protein                      | 9.5544895 | 9.54E+09 | PolysaccharideBacteria | BacteroidetesCytophaga            | Cytophagales          | Chryseoidae                   |
| 195281,2  | Transcription                                       | Transcription factors                           | Ribosomal protein L13                                          | 9.5381145 | 3.47E+11 | PolysaccharideBacteria | BacteroidetesCytophaga            | Cytophagales          | Chryseoidae                   |
| 200678,2  | Carbohydrate metabolism                             | Pyruvate metabolism                             | Pyruvate dehydrogenase E component subunit alpha               | 9.5375105 | 1.83E+07 | PolysaccharideBacteria | BacteroidetesCytophaga            | Cytophagales          | Chryseoidae                   |
| 124931,2  | No genes mapped out of 4 KDs                        | Transcription factors                           | Not in_Usif                                                    | 9.5077135 | 4.11E+11 | PolysaccharideBacteria | BacteroidetesCytophaga            | Cytophagales          | Chryseoidae                   |
| 102975,11 | No genes mapped out of 4 KDs                        | Transcription factors                           | CD14c-like domain containing protein                           | 9.4885107 | 1.84E+08 | PolysaccharideBacteria | Cyanobacteria                     |                       | Cyanobacteria                 |
| 48382,15  | Transport and binding proteins                      | Transcription factors                           | Reactive sulfation protein SpsV                                | 9.4840037 | 6.93E+14 | PolysaccharideBacteria | ProteobacteriaBetaproteobacteria  | Comamonadales         | Varonaceae                    |
| 102359,4  | Carbohydrate metabolism                             | Amino acids, peptides and amines                | Transcription initiation factor R-3                            | 9.473394  | 3.88E+14 | PolysaccharideBacteria | BacteroidetesCytophaga            | Cytophagales          | Chryseoidae                   |
| 178667,6  | Metabolism of other amino acids and amines          | Glutamine and analogs metabolism                | Rhamnulose 1-phosphate aldolase/cholesterol dehydrogenase      | 9.4265971 | 1.00E+12 | PolysaccharideBacteria | BacteroidetesCytophaga            | Chitinophaga          | Nisslella                     |
| 176041,2  | Transcription                                       | Transcription factors                           | Glutamate-cysteine ligase                                      | 9.4343479 | 6.91E+15 | PolysaccharideBacteria | ProteobacteriaBetaproteobacteria  | Burkholderiales       | Rhizobium                     |
| 15922,2   | Intercellular trafficking, assembly, and processing | Peptidases                                      | Lin peptidase                                                  | 9.4435162 | 2.20E+10 | PolysaccharideBacteria | ProteobacteriaGammaproteobacteria | Sinorhizobiales       | Sinorhizobium                 |
| 157127,2  | Transcription                                       | Transcription factors                           | RNA-binding transcriptional accessory protein                  | 9.4099323 | 1.18E+08 | PolysaccharideBacteria | BacteroidetesChitinophaga         | Chitinophagales       | Chitinophaga bacterium PMP31F |
| 103272,2  | Transcription                                       | Ribosomal proteins: synthesis and modification  | Ribosomal protein S10                                          | 9.4052113 | 5.09E+10 | PolysaccharideBacteria | BacteroidetesCytophaga            | Cytophagales          | Ohtaewalgia                   |
| 84407,7   | Energy metabolism                                   | Ketogen metabolism                              | Ferredoxin-cytochrome b5 reductase                             | 9.3794973 | 1.01E+10 | PolysaccharideBacteria | BacteroidetesCytophaga            | Ohtaewalgia           | Ohtaewalgia koreensis         |
| 113141,7  | Carbohydrate metabolism                             | Glycolysis / Gluconeogenesis                    | Glyceraldehyde 3-phosphate dehydrogenase                       | 9.3621299 | 4.02E+12 | PolysaccharideBacteria | ProteobacteriaBetaproteobacteria  |                       |                               |
| 181749,3  | No genes mapped out of 4 KDs                        | Transcription factors                           | Ribosomal protein S18                                          | 9.34806   | 1.42E+10 | PolysaccharideBacteria | ProteobacteriaGammaproteobacteria | Xanthomonadales       | Xanthomonas                   |
| 176420,6  | Transcription                                       | Transcription factors                           | Elongation factor G                                            | 9.3408873 | 5.03E+10 | PolysaccharideBacteria | BacteroidetesCytophaga            | Cytophagales          | Chryseoidae                   |
| 114144,3  | Intercellular trafficking, assembly, and processing | Chaperone and folding catalysis                 | Peptidyl prolyl 4G-tran isomerase                              | 9.3388116 | 6.44E+10 | PolysaccharideBacteria | BacteroidetesCytophaga            | Cytophagales          | Chryseoidae                   |
| 49036,3   | Transcription                                       | Transcription factors                           | Protein-RNA ligase                                             | 9.3172690 | 4.54E+18 | PolysaccharideBacteria | BacteroidetesCytophaga            | Chitinophaga          | Oxidobacterium                |
| 6079,2    | Nucleic acid metabolism                             | Nucleic acid metabolism                         | Ribose-phosphate epimerase                                     | 9.3138878 | 6.57E+19 | PolysaccharideBacteria | BacteroidetesCytophaga            | Cytophagales          | Chryseoidae                   |
| 151422,4  | Intercellular trafficking, assembly, and processing | Chaperone and folding catalysis                 | ATP-dependent Co-protease ATP-binding subunit Cpx              | 9.3174245 | 3.78E+10 | PolysaccharideBacteria | ProteobacteriaBetaproteobacteria  | Burkholderiales       | Burkholderia                  |
| 192981,3  | Transport and binding proteins                      | Transcription factors                           | OmpA family protein                                            | 9.3138129 | 2.14E+10 | PolysaccharideBacteria | ProteobacteriaBetaproteobacteria  | Comamonadales         | Parvomonas                    |
| 20915,4   | Transport and binding proteins                      | Peritrichous flagella                           | OmpA family protein                                            | 9.3138129 | 2.14E+10 | PolysaccharideBacteria | ProteobacteriaBetaproteobacteria  | Comamonadales         | Parvomonas                    |
| 113352,56 | Intercellular trafficking, assembly, and processing | Peptidases                                      | ATP-dependent zinc metalloprotease FtsH                        | 9.3032045 | 1.11E+10 | PolysaccharideBacteria | BacteroidetesCytophaga            | Cytophagales          | Chryseoidae                   |
| 102528,3  | No genes mapped out of 4 KDs                        | Transcription factors                           | CD14c-like domain containing protein                           | 9.3032045 | 1.11E+10 | PolysaccharideBacteria | BacteroidetesCytophaga            | Cytophagales          | Chryseoidae                   |
| 145454,9  | No genes mapped out of 4 KDs                        | Transcription factors                           | PAS domain 5-coil containing protein                           | 9.2878616 | 9.06E+09 | PolysaccharideBacteria | ProteobacteriaAlphaproteobacteria | Bradyrhizobiales      | Bradyrhizobium                |
| 137031,5  | No genes mapped out of 4 KDs                        | Transcription factors                           | Proteinase subunit alpha                                       | 9.2864942 | 4.02E+10 | PolysaccharideBacteria | BacteroidetesCytophaga            | Chitinophaga          | Chitinophaga                  |
| 33954,8   | Transcription                                       | Transcription factors                           | Transcription initiation factor F-2                            | 9.2838781 | 5.38E+08 | PolysaccharideBacteria | Arthropoda                        | Insecta               | Phasmodinidae                 |
| 191730,3  | Intercellular trafficking, assembly, and processing | Chaperone and folding catalysis                 | Proteinase subunit alpha                                       | 9.2838781 | 5.38E+08 | PolysaccharideBacteria | Arthropoda                        | Insecta               | Phasmodinidae                 |
| 103977,1  | No genes mapped out of 4 KDs                        | Chaperone and folding catalysis                 | 60 kDa chaperonin                                              | 9.2838781 | 5.38E+08 | PolysaccharideBacteria | Arthropoda                        | Insecta               | Phasmodinidae                 |
| 382109,9  | Fatty acid and lipid metabolism                     | Biochemistry                                    | Uncharacterized amino-acid ABC transporter ATP-binding subunit | 9.2668848 | 1.24E+18 | PolysaccharideBacteria | Arthropoda                        | Insecta               | Lepidoptera                   |
| 414385,5  | Prosthetic groups, cofactors, and carriers          | Iron sulfur clusters                            | Acyl carrier protein                                           | 9.2642564 | 1.65E+10 | PolysaccharideBacteria | BacteroidetesCytophaga            | Cytophagales          | Chryseoidae                   |
| 107240,2  | Signal transduction                                 | Two-component systems                           | F45 assembly scaffold apponin Ucu                              | 9.2450885 | 6.05E+08 | PolysaccharideBacteria | Arthropoda                        | Insecta               | Phasmodinidae                 |
| 5310,2    | No genes mapped out of 4 KDs                        | Transcription factors                           | Ferredoxin-cytochrome b5 reductase                             | 9.2383173 | 1.01E+10 | PolysaccharideBacteria | BacteroidetesCytophaga            | Cytophagales          | Chryseoidae                   |
| 106908,4  | Nucleic acid metabolism                             | D replication, recombination, and repair        | RNA polymerase beta prime factor                               | 9.2295726 | 4.27E+08 | PolysaccharideBacteria | ActinobacteriaActinobacteriales   | Micromonosporales     | Actinoplanes                  |
| 114475,14 | Amino acid metabolism                               | Amino acids, aspartate and glutamate metabolism | Transcription factor G                                         | 9.2295726 | 4.27E+08 | PolysaccharideBacteria | ActinobacteriaActinobacteriales   | Micromonosporales     | Actinoplanes                  |
| 141820,12 | No genes mapped out of 4 KDs                        | Transcription factors                           | Not in_Usif                                                    | 9.2075731 | 3.96E+17 | PolysaccharideBacteria | ProteobacteriaBetaproteobacteria  | Burkholderiales       | Burkholderia                  |
| 141820,12 | No genes mapped out of 4 KDs                        | Transcription factors                           | Not in_Usif                                                    | 9.2075731 | 3.96E+17 | PolysaccharideBacteria | ProteobacteriaBetaproteobacteria  | Burkholderiales       | Burkholderia                  |
| 141820,12 | No genes mapped out of 4 KDs                        | Transcription factors                           | Not in_Usif                                                    | 9.2075731 | 3.96E+17 | PolysaccharideBacteria | ProteobacteriaBetaproteobacteria  | Burkholderiales       | Burkholderia                  |
| 141820,12 | No genes mapped out of 4 KDs                        | Transcription factors                           | Not in_Usif                                                    | 9.2075731 | 3.96E+17 | PolysaccharideBacteria | ProteobacteriaBetaproteobacteria  | Burkholderiales       | Burkholderia                  |
| 141820,12 | No genes mapped out of 4 KDs                        | Transcription factors                           | Not in_Usif                                                    | 9.2075731 | 3.96E+17 | PolysaccharideBacteria | ProteobacteriaBetaproteobacteria  | Burkholderiales       | Burkholderia                  |
| 141820,12 | No genes mapped out of 4 KDs                        | Transcription factors                           | Not in_Usif                                                    | 9.2075731 | 3.96E+17 | PolysaccharideBacteria | ProteobacteriaBetaproteobacteria  | Burkholderiales       | Burkholderia                  |
| 141820,12 | No genes mapped out of 4 KDs                        | Transcription factors                           | Not in_Usif                                                    | 9.2075731 | 3.96E+17 | PolysaccharideBacteria | ProteobacteriaBetaproteobacteria  | Burkholderiales       | Burkholderia                  |
| 141820,12 | No genes mapped out of 4 KDs                        | Transcription factors                           | Not in_Usif                                                    | 9.2075731 | 3.96E+17 | PolysaccharideBacteria | ProteobacteriaBetaproteobacteria  | Burkholderiales       | Burkholderia                  |
| 141820,12 | No genes mapped out of 4 KDs                        | Transcription factors                           | Not in_Usif                                                    | 9.2075731 | 3.96E+17 | PolysaccharideBacteria | ProteobacteriaBetaproteobacteria  | Burkholderiales       | Burkholderia                  |
| 141820,12 | No genes mapped out of 4 KDs                        | Transcription factors                           | Not in_Usif                                                    | 9.2075731 | 3.96E+17 | PolysaccharideBacteria | ProteobacteriaBetaproteobacteria  | Burkholderiales       | Burkholderia                  |
| 141820,12 | No genes mapped out of 4 KDs                        | Transcription factors                           | Not in_Usif                                                    | 9.2075731 | 3.96E+17 | PolysaccharideBacteria | ProteobacteriaBetaproteobacteria  | Burkholderiales       | Burkholderia                  |
| 141820,12 | No genes mapped out of 4 KDs                        | Transcription factors                           | Not in_Usif                                                    | 9.2075731 | 3.96E+17 | PolysaccharideBacteria | ProteobacteriaBetaproteobacteria  | Burkholderiales       | Burkholderia                  |
| 141820,12 | No genes mapped out of 4 KDs                        | Transcription factors                           | Not in_Usif                                                    | 9.2075731 | 3.96E+17 | PolysaccharideBacteria | ProteobacteriaBetaproteobacteria  | Burkholderiales       | Burkholderia                  |
| 141820,12 | No genes mapped out of 4 KDs                        | Transcription factors                           | Not in_Usif                                                    | 9.2075731 | 3.96E+17 | PolysaccharideBacteria | ProteobacteriaBetaproteobacteria  | Burkholderiales       | Burkholderia                  |
| 141820,12 | No genes mapped out of 4 KDs                        | Transcription factors                           | Not in_Usif                                                    | 9.2075731 | 3.96E+17 | PolysaccharideBacteria | ProteobacteriaBetaproteobacteria  | Burkholderiales       | Burkholderia                  |
| 141820,12 | No genes mapped out of 4 KDs                        | Transcription factors                           | Not in_Usif                                                    | 9.2075731 | 3.96E+17 | PolysaccharideBacteria | ProteobacteriaBetaproteobacteria  | Burkholderiales       | Burkholderia                  |
| 141820,12 | No genes mapped out of 4 KDs                        | Transcription factors                           | Not in_Usif                                                    | 9.2075731 | 3.96E+17 | PolysaccharideBacteria | ProteobacteriaBetaproteobacteria  | Burkholderiales       | Burkholderia                  |
| 141820,12 | No genes mapped out of 4 KDs                        | Transcription factors                           | Not in_Usif                                                    | 9.2075731 | 3.96E+17 | PolysaccharideBacteria | ProteobacteriaBetaproteobacteria  | Burkholderiales       | Burkholderia                  |
| 141820,12 | No genes mapped out of 4 KDs                        | Transcription factors                           | Not in_Usif                                                    | 9.2075731 | 3.96E+17 | PolysaccharideBacteria | ProteobacteriaBetaproteobacteria  | Burkholderiales       | Burkholderia                  |
| 141820,12 | No genes mapped out of 4 KDs                        | Transcription factors                           | Not in_Usif                                                    | 9.2075731 | 3.96E+17 | PolysaccharideBacteria | ProteobacteriaBetaproteobacteria  | Burkholderiales       | Burkholderia                  |
| 141820,12 | No genes mapped out of 4 KDs                        | Transcription factors                           | Not in_Usif                                                    | 9.2075731 | 3.96E+17 | PolysaccharideBacteria | ProteobacteriaBetaproteobacteria  | Burkholderiales       | Burkholderia                  |
| 141820,12 | No genes mapped out of 4 KDs                        | Transcription factors                           | Not in_Usif                                                    | 9.2075731 | 3.96E+17 | PolysaccharideBacteria | ProteobacteriaBetaproteobacteria  | Burkholderiales       | Burkholderia                  |
| 141820,12 | No genes mapped out of 4 KDs                        | Transcription factors                           | Not in_Usif                                                    | 9.2075731 | 3.96E+17 | PolysaccharideBacteria | ProteobacteriaBetaproteobacteria  | Burkholderiales       | Burkholderia                  |
| 141820,12 | No genes mapped out of 4 KDs                        | Transcription factors                           | Not in_Usif                                                    | 9.2075731 | 3.96E+17 | PolysaccharideBacteria | ProteobacteriaBetaproteobacteria  | Burkholderiales       | Burkholderia                  |
| 141820,12 | No genes mapped out of 4 KDs                        | Transcription factors                           | Not in_Usif                                                    | 9.2075731 | 3.96E+17 | PolysaccharideBacteria | ProteobacteriaBetaproteobacteria  | Burkholderiales       | Burkholderia                  |
| 141820,12 | No genes mapped out of 4 KDs                        | Transcription factors                           | Not in_Usif                                                    | 9.2075731 | 3.96E+17 | PolysaccharideBacteria | ProteobacteriaBetaproteobacteria  | Burkholderiales       | Burkholderia                  |
| 141820,12 | No genes mapped out of 4 KDs                        | Transcription factors                           | Not in_Usif                                                    | 9.2075731 | 3.96E+17 | PolysaccharideBacteria | ProteobacteriaBetaproteobacteria  | Burkholderiales       | Burkholderia                  |
| 141820,12 | No genes mapped out of 4 KDs                        | Transcription factors                           | Not in_Usif                                                    | 9.2075731 | 3.96E+17 | PolysaccharideBacteria | ProteobacteriaBetaproteobacteria  | Burkholderiales       | Burkholderia                  |
| 141820,12 | No genes mapped out of 4 KDs                        | Transcription factors                           | Not in_Usif                                                    | 9.2075731 | 3.96E+17 | PolysaccharideBacteria | ProteobacteriaBetaproteobacteria  | Burkholderiales       | Burkholderia                  |
| 141820,12 | No genes mapped out of 4 KDs                        | Transcription factors                           | Not in_Usif                                                    | 9.2075731 | 3.96E+17 | PolysaccharideBacteria | ProteobacteriaBetaproteobacteria  | Burkholderiales       | Burkholderia                  |
| 141820,12 | No genes mapped out of 4 KDs                        | Transcription factors                           | Not in_Usif                                                    | 9.2075731 | 3.96E+17 | PolysaccharideBacteria | ProteobacteriaBetaproteobacteria  | Burkholderiales       | Burkholderia                  |
| 141820,12 | No genes mapped out of 4 KDs                        | Transcription factors                           | Not in_Usif                                                    | 9.2075731 | 3.96E+17 | PolysaccharideBacteria | ProteobacteriaBetaproteobacteria  | Burkholderiales       | Burkholderia                  |
| 141820,12 | No genes mapped out of 4 KDs                        | Transcription factors                           | Not in_Usif                                                    | 9.2075731 | 3.96E+17 | PolysaccharideBacteria | ProteobacteriaBetaproteobacteria  | Burkholderiales       | Burkholderia                  |
| 141820,12 | No genes mapped out of 4 KDs                        | Transcription factors                           | Not in_Usif                                                    | 9.2075731 | 3.96E+17 | PolysaccharideBacteria | ProteobacteriaBetaproteobacteria  | Burkholderiales       | Burkholderia                  |
| 141820,12 | No genes mapped out of 4 KDs                        | Transcription factors                           | Not in_Usif                                                    | 9.2075731 | 3.96E+17 | PolysaccharideBacteria | ProteobacteriaBetaproteobacteria  | Burkholderiales       | Burkholderia                  |
| 141820,12 | No genes mapped out of 4 KDs                        | Transcription factors                           | Not in_Usif                                                    | 9.2075731 | 3.96E+17 | PolysaccharideBacteria | ProteobacteriaBetaproteobacteria  | Burkholderiales       | Burkholderia                  |
| 141820,12 | No genes mapped out of 4 KDs                        | Transcription factors                           | Not in_Usif                                                    | 9.2075731 | 3.96E+17 | PolysaccharideBacteria | ProteobacteriaBetaproteobacteria  | Burkholderiales       | Burkholderia                  |
| 141820,12 | No genes mapped out of 4 KDs                        | Transcription factors                           | Not in_Usif                                                    | 9.2075731 | 3.96E+17 | PolysaccharideBacteria | ProteobacteriaBetaproteobacteria  | Burkholderiales       | Burkholderia                  |
| 141820,12 | No genes mapped out of 4 KDs                        | Transcription factors                           | Not in_Usif                                                    | 9.2075731 | 3.96E+17 | PolysaccharideBacteria | ProteobacteriaBetaproteobacteria  | Burkholderiales       | Burkholderia                  |
| 141820,12 | No genes mapped out of 4 KDs                        | Transcription factors                           | Not in_Usif                                                    | 9.2075731 | 3.96E+17 | PolysaccharideBacteria | ProteobacteriaBetaproteobacteria  | Burkholderiales       | Burkholderia                  |
| 141820,12 | No genes mapped out of 4 KDs                        | Transcription factors                           | Not in_Usif                                                    | 9.2075731 | 3.96E+17 | PolysaccharideBacteria | ProteobacteriaBetaproteobacteria  | Burkholderiales       | Burkholderia                  |
| 141820,12 | No genes mapped out of 4 KDs                        | Transcription factors                           | Not in_Usif                                                    | 9.2075731 | 3.96E+17 | PolysaccharideBacteria | ProteobacteriaBetaproteobacteria  | Burkholderiales       | Burkholderia                  |
| 141820,12 | No genes mapped out of 4 KDs                        | Transcription factors                           | Not in_Usif                                                    | 9.2075731 | 3.96E+17 | PolysaccharideBacteria | ProteobacteriaBetaproteobacteria  | Burkholderiales       | Burkholderia                  |
| 141820,12 | No genes mapped out of 4 KDs                        | Transcription factors                           | Not in_Usif                                                    | 9.2075731 | 3.96E+17 | PolysaccharideBacteria | ProteobacteriaBetaproteobacteria  | Burkholderiales       | Burkholderia                  |
| 141820,12 | No genes mapped out of 4 KDs                        | Transcription factors                           | Not in_Usif                                                    | 9.2075731 | 3.96E+17 | PolysaccharideBacteria | ProteobacteriaBetaproteobacteria  | Burkholderiales       |                               |

|            |                                                     |                                                     |                                                        |           |          |                |                   |                 |                |                 |                      |             |
|------------|-----------------------------------------------------|-----------------------------------------------------|--------------------------------------------------------|-----------|----------|----------------|-------------------|-----------------|----------------|-----------------|----------------------|-------------|
| 195848_3   | Nucleic acid metabolism                             | Purine metabolism                                   | Bi-functional purine biosynthesis protein PurH         | R14568139 | 8.73E-07 | Polysaccharide | Proteobacteriales | Burkholderiales | Comamonadaceae | Comamonas       | Comamonas sp. B62024 |             |
| 382335_3   | Transcription                                       | Ribosomal proteins; synthesis and modification      | Ribosomal proteins; synthesis and modification         | R14568139 | 8.73E-07 | Polysaccharide | Proteobacteriales | Burkholderiales | Comamonadaceae | Comamonas       | Comamonas sp. B62024 |             |
| 28133_7    | Translation                                         | Transfer R biogenesis                               | Alanine-tRNA ligase                                    | R4078654  | 4.97E-13 | Polysaccharide | Proteobacteriales | Burkholderiales | Comamonadaceae | Comamonas       | Comamonas sp. B62024 |             |
| 1337578_20 | Regulatory functions                                | Protein interactions                                | Regulatory protein Inaap                               | R14568139 | 8.73E-07 | Polysaccharide | Proteobacteriales | Burkholderiales | Comamonadaceae | Comamonas       | Comamonas sp. B62024 |             |
| 165028_6   | Translation                                         | Transfer R biogenesis                               | Polynucleotide nucleotidyltransferase                  | R40382489 | 1.52E-11 | Polysaccharide | Bacteroidetes     | Cytophagales    | Cytophagales   | Chryseolaceae   | Lawsontia            | Lawsontia   |
| 229268_5   | No files mapped out of 6 KOs                        | Peptidases                                          | Uncharacterized protein                                | R4011184  | 9.74E-10 | Polysaccharide | Firmicutes        | Clostridia      | Clostridiales  | Lachnospiraceae | Lachnospira          | Lachnospira |
| 162070_1   | Intracellular trafficking, assembly, and processing | Ribosomal proteins; synthesis and modification      | Uncharacterized protein S18                            | R3968174  | 1.0E-06  | Polysaccharide | Proteobacteriales | Burkholderiales | Comamonadaceae | Comamonas       | Comamonas sp. B62024 |             |
| 570287_8   | Translation                                         | Purine metabolism                                   | Phosphoribosyltransferase                              | R14568139 | 8.73E-07 | Polysaccharide | Proteobacteriales | Burkholderiales | Comamonadaceae | Comamonas       | Comamonas sp. B62024 |             |
| 152908_3   | Nucleic acid metabolism                             | Transcription factors                               | Transcription termination/antitermination protein NusA | R1372818  | 6.17E-14 | Polysaccharide | Proteobacteriales | Burkholderiales | Comamonadaceae | Comamonas       | Comamonas sp. B62024 |             |
| 842494_3   | Transcription                                       | Protein interactions                                | Protein-protein interaction regulator NusG/CP740       | R14568139 | 8.73E-07 | Polysaccharide | Proteobacteriales | Burkholderiales | Comamonadaceae | Comamonas       | Comamonas sp. B62024 |             |
| 1617378_3  | Intracellular trafficking, assembly, and processing | Ribosomal proteins; synthesis and modification      | Citrate cyclic (TCA cycle)                             | R40381158 | 2.19E-06 | Polysaccharide | Proteobacteriales | Burkholderiales | Comamonadaceae | Comamonas       | Comamonas sp. B62024 |             |
| 1460317_3  | Carbohydrate metabolism                             | Ribosomal proteins; synthesis and modification      | Succinate-CoA ligase [ADP-forming] subunit beta        | R13816478 | 3.37E-11 | Polysaccharide | Proteobacteriales | Burkholderiales | Comamonadaceae | Comamonas       | Comamonas sp. B62024 |             |
| 42002_10   | No files mapped out of 6 KOs                        | Ribosomal proteins; synthesis and modification      | Probable transcriptional regulator NusG/CP740          | R13816478 | 3.37E-11 | Polysaccharide | Proteobacteriales | Burkholderiales | Comamonadaceae | Comamonas       | Comamonas sp. B62024 |             |
| 74122_40   | Translation                                         | Citrate cyclic (TCA cycle)                          | 50S ribosomal protein L3                               | R14568139 | 8.73E-07 | Polysaccharide | Proteobacteriales | Burkholderiales | Comamonadaceae | Comamonas       | Comamonas sp. B62024 |             |
| 52345_5    | No files mapped out of 6 KOs                        | Chemotaxis                                          | Chemotaxis protein CheV                                | R1393037  | 1.57E-08 | Polysaccharide | Proteobacteriales | Burkholderiales | Comamonadaceae | Comamonas       | Comamonas sp. B62024 |             |
| 1601_3     | No files mapped out of 6 KOs                        | Translation factors                                 | Elongation factor Tu                                   | R1322861  | 1.28E-14 | Polysaccharide | Proteobacteriales | Burkholderiales | Comamonadaceae | Comamonas       | Comamonas sp. B62024 |             |
| 25703_1    | Translation                                         | Translation factors                                 | Elongation factor Tu                                   | R1322861  | 1.28E-14 | Polysaccharide | Proteobacteriales | Burkholderiales | Comamonadaceae | Comamonas       | Comamonas sp. B62024 |             |
| 111814_4   | Translation                                         | Oxidative phosphorylation                           | ATP synthase subunit b                                 | R1314366  | 2.31E-07 | Polysaccharide | Bacteroidetes     | Cytophagales    | Cytophagales   | Chryseolaceae   | Lawsontia            | Lawsontia   |
| 1130999_4  | Energy metabolism                                   | No files mapped out of 6 KOs                        | ATP synthase subunit b                                 | R1314366  | 2.31E-07 | Polysaccharide | Bacteroidetes     | Cytophagales    | Cytophagales   | Chryseolaceae   | Lawsontia            | Lawsontia   |
| 3643_8     | No files mapped out of 6 KOs                        | Translation                                         | Chemotaxis protein CheB                                | R1393794  | 1.64E-07 | Polysaccharide | Proteobacteriales | Burkholderiales | Comamonadaceae | Comamonas       | Comamonas sp. B62024 |             |
| 505102_17  | Signal transduction                                 | Ribosomal proteins; synthesis and modification      | Chemotaxis protein CheA                                | R1329681  | 4.15E-09 | Polysaccharide | Proteobacteriales | Burkholderiales | Comamonadaceae | Comamonas       | Comamonas sp. B62024 |             |
| 11202_19   | Translation                                         | Ribosomal proteins; synthesis and modification      | 50S ribosomal protein L34                              | R1324866  | 1.82E-11 | Polysaccharide | Proteobacteriales | Burkholderiales | Comamonadaceae | Comamonas       | Comamonas sp. B62024 |             |
| 3244_4     | Translation                                         | Carbohydrate metabolism                             | Uncharacterized protein                                | R1324866  | 1.82E-11 | Polysaccharide | Proteobacteriales | Burkholderiales | Comamonadaceae | Comamonas       | Comamonas sp. B62024 |             |
| 19362_2    | Carbohydrate metabolism                             | Carbohydrate metabolism                             | Uncharacterized protein                                | R1324866  | 1.82E-11 | Polysaccharide | Proteobacteriales | Burkholderiales | Comamonadaceae | Comamonas       | Comamonas sp. B62024 |             |
| 12102_14   | No files mapped out of 6 KOs                        | Ribosomal proteins; synthesis and modification      | Uncharacterized protein                                | R1324866  | 1.82E-11 | Polysaccharide | Proteobacteriales | Burkholderiales | Comamonadaceae | Comamonas       | Comamonas sp. B62024 |             |
| 1346275_5  | Transport and binding proteins                      | Amino acids, peptides and amines                    | Ethanolamine utilization protein EutP                  | R1320156  | 7.08E-07 | Polysaccharide | Proteobacteriales | Burkholderiales | Comamonadaceae | Comamonas       | Comamonas sp. B62024 |             |
| 92180_5    | Translation                                         | Ribosomal proteins; synthesis and modification      | 50S ribosomal protein L6                               | R1318783  | 4.11E-07 | Polysaccharide | Proteobacteriales | Burkholderiales | Comamonadaceae | Comamonas       | Comamonas sp. B62024 |             |
| 54514_4    | No files mapped out of 6 KOs                        | Ribosomal proteins; synthesis and modification      | Hemix uptake protein Hmup                              | R1304524  | 9.28E-11 | Polysaccharide | Proteobacteriales | Burkholderiales | Comamonadaceae | Comamonas       | Comamonas sp. B62024 |             |
| 40849_4    | Translation                                         | Ribosomal proteins; synthesis and modification      | 50S ribosomal protein L6                               | R1318783  | 4.11E-07 | Polysaccharide | Proteobacteriales | Burkholderiales | Comamonadaceae | Comamonas       | Comamonas sp. B62024 |             |
| 19170_2    | Intracellular trafficking, assembly, and processing | Peptidases                                          | Periplasmic enzyme endonuclease DegP-like              | R1300419  | 4.41E-14 | Polysaccharide | Proteobacteriales | Burkholderiales | Comamonadaceae | Comamonas       | Comamonas sp. B62024 |             |
| 180726_7   | Carbohydrate metabolism                             | Glycolysis / Gluconeogenesis                        | Fructose 1,6-bisphosphatase class I                    | R1329436  | 7.00E-10 | Polysaccharide | Proteobacteriales | Burkholderiales | Comamonadaceae | Comamonas       | Comamonas sp. B62024 |             |
| 146448_2   | Translation                                         | Ribosomal proteins; synthesis and modification      | 50S ribosomal protein L10                              | R1329879  | 1.38E-11 | Polysaccharide | Proteobacteriales | Burkholderiales | Comamonadaceae | Comamonas       | Comamonas sp. B62024 |             |
| 157121_2   | Energy metabolism                                   | Oxidative phosphorylation                           | NADH quinone oxidoreductase subunit N                  | R1328728  | 7.24E-07 | Polysaccharide | Proteobacteriales | Burkholderiales | Comamonadaceae | Comamonas       | Comamonas sp. B62024 |             |
| 164112_2   | Translation                                         | Ribosomal proteins; synthesis and modification      | NADH quinone oxidoreductase subunit N                  | R1328728  | 7.24E-07 | Polysaccharide | Proteobacteriales | Burkholderiales | Comamonadaceae | Comamonas       | Comamonas sp. B62024 |             |
| 34868_7    | Intracellular trafficking, assembly, and processing | Chaperone and folding catalysis                     | ATP dependent Clp protease ATP-binding subunit ClpA    | R1327433  | 7.44E-07 | Polysaccharide | Proteobacteriales | Burkholderiales | Comamonadaceae | Comamonas       | Comamonas sp. B62024 |             |
| 101052_3   | No files mapped out of 6 KOs                        | Protein interactions                                | Intricate kinase domain-containing protein             | R1327433  | 7.44E-07 | Polysaccharide | Proteobacteriales | Burkholderiales | Comamonadaceae | Comamonas       | Comamonas sp. B62024 |             |
| 83174_4    | Regulatory functions                                | Protein interactions                                | Metalloprotease TMD                                    | R1421344  | 1.47E-10 | Polysaccharide | Proteobacteriales | Burkholderiales | Comamonadaceae | Comamonas       | Comamonas sp. B62024 |             |
| 2144_1     | Translation                                         | Transfer R biogenesis                               | Polynucleotide nucleotidyltransferase                  | R1396174  | 2.38E-10 | Polysaccharide | Proteobacteriales | Burkholderiales | Comamonadaceae | Comamonas       | Comamonas sp. B62024 |             |
| 101713_1   | No files mapped out of 6 KOs                        | Translation                                         | Uncharacterized protein                                | R1396174  | 2.38E-10 | Polysaccharide | Proteobacteriales | Burkholderiales | Comamonadaceae | Comamonas       | Comamonas sp. B62024 |             |
| 114893_2   | No files mapped out of 6 KOs                        | Ribosomal proteins; synthesis and modification      | PIG-1 family deacylase                                 | R1385919  | 6.17E-10 | Polysaccharide | Proteobacteriales | Burkholderiales | Comamonadaceae | Comamonas       | Comamonas sp. B62024 |             |
| 131865_24  | Translation                                         | Ribosomal proteins; synthesis and modification      | RNA polymerase sigma factor                            | R1385919  | 6.17E-10 | Polysaccharide | Proteobacteriales | Burkholderiales | Comamonadaceae | Comamonas       | Comamonas sp. B62024 |             |
| 103390_4   | Transcription                                       | Transcription factors                               | RNA polymerase sigma 54 factor                         | R1385919  | 6.17E-10 | Polysaccharide | Proteobacteriales | Burkholderiales | Comamonadaceae | Comamonas       | Comamonas sp. B62024 |             |
| 153448_8   | Translation                                         | Ribosomal proteins; synthesis and modification      | 50S ribosomal protein L10                              | R1329879  | 1.38E-11 | Polysaccharide | Proteobacteriales | Burkholderiales | Comamonadaceae | Comamonas       | Comamonas sp. B62024 |             |
| 166491_1   | Translation                                         | Translation factors                                 | Elongation factor Tu                                   | R1329879  | 1.38E-11 | Polysaccharide | Proteobacteriales | Burkholderiales | Comamonadaceae | Comamonas       | Comamonas sp. B62024 |             |
| 31181_1    | Energy metabolism                                   | Oxidative phosphorylation                           | ATP synthase epsilon chain                             | R1329879  | 1.38E-11 | Polysaccharide | Proteobacteriales | Burkholderiales | Comamonadaceae | Comamonas       | Comamonas sp. B62024 |             |
| 142254_5   | Intracellular trafficking, assembly, and processing | Protein export, secretion, and sorting              | Signal recognition particle receptor Ynf               | R1329879  | 1.38E-11 | Polysaccharide | Proteobacteriales | Burkholderiales | Comamonadaceae | Comamonas       | Comamonas sp. B62024 |             |
| 105462_3   | Intracellular trafficking, assembly, and processing | Chaperone and folding catalysis                     | ATP dependent Clp protease ATP-binding subunit ClpA    | R1327433  | 7.44E-07 | Polysaccharide | Proteobacteriales | Burkholderiales | Comamonadaceae | Comamonas       | Comamonas sp. B62024 |             |
| 161971_23  | No files mapped out of 6 KOs                        | Non-ribosomal peptide synthetase complex F          | Non-ribosomal peptide synthetase complex F             | R1327433  | 7.44E-07 | Polysaccharide | Proteobacteriales | Burkholderiales | Comamonadaceae | Comamonas       | Comamonas sp. B62024 |             |
| 80428_4    | Translation                                         | Ribosomal proteins; synthesis and modification      | 50S ribosomal protein L12                              | R1318783  | 4.11E-07 | Polysaccharide | Proteobacteriales | Burkholderiales | Comamonadaceae | Comamonas       | Comamonas sp. B62024 |             |
| 617551_4   | Ribosomal proteins; synthesis and modification      | Translation factors                                 | Translation factor L3                                  | R1318783  | 4.11E-07 | Polysaccharide | Proteobacteriales | Burkholderiales | Comamonadaceae | Comamonas       | Comamonas sp. B62024 |             |
| 112881_1   | Translation                                         | Translation factors                                 | Fatty acid ligase                                      | R1318783  | 4.11E-07 | Polysaccharide | Proteobacteriales | Burkholderiales | Comamonadaceae | Comamonas       | Comamonas sp. B62024 |             |
| 140708_3   | Oxygen biosynthesis and metabolism                  | Photosynthesis and lipopolysaccharide metabolism    | Long-chain fatty acid-CoA ligase                       | R1318783  | 4.11E-07 | Polysaccharide | Proteobacteriales | Burkholderiales | Comamonadaceae | Comamonas       | Comamonas sp. B62024 |             |
| 120307_2   | Transport and binding proteins                      | Chaperone and folding catalysis                     | Outer membrane protein OmpA                            | R1318783  | 4.11E-07 | Polysaccharide | Proteobacteriales | Burkholderiales | Comamonadaceae | Comamonas       | Comamonas sp. B62024 |             |
| 62893_1    | Energy metabolism                                   | NADH quinone oxidoreductase                         | NADH quinone oxidoreductase                            | R1318783  | 4.11E-07 | Polysaccharide | Proteobacteriales | Burkholderiales | Comamonadaceae | Comamonas       | Comamonas sp. B62024 |             |
| 315817_2   | No files mapped out of 6 KOs                        | Not in UniProt                                      | Not in UniProt                                         | R1318783  | 4.11E-07 | Polysaccharide | Proteobacteriales | Burkholderiales | Comamonadaceae | Comamonas       | Comamonas sp. B62024 |             |
| 10977_2    | No files mapped out of 6 KOs                        | Regulatory functions                                | Not in UniProt                                         | R1318783  | 4.11E-07 | Polysaccharide | Proteobacteriales | Burkholderiales | Comamonadaceae | Comamonas       | Comamonas sp. B62024 |             |
| 66888_2    | No files mapped out of 6 KOs                        | D interactions                                      | Not in UniProt                                         | R1318783  | 4.11E-07 | Polysaccharide | Proteobacteriales | Burkholderiales | Comamonadaceae | Comamonas       | Comamonas sp. B62024 |             |
| 92348_6    | Nucleic acid metabolism                             | R degradation                                       | RNA pyrophosphorylase                                  | R1318783  | 4.11E-07 | Polysaccharide | Proteobacteriales | Burkholderiales | Comamonadaceae | Comamonas       | Comamonas sp. B62024 |             |
| 164211_1   | Carbohydrate metabolism                             | Carbohydrate metabolism                             | beta-glucosyltransferase                               | R1318783  | 4.11E-07 | Polysaccharide | Proteobacteriales | Burkholderiales | Comamonadaceae | Comamonas       | Comamonas sp. B62024 |             |
| 138065_16  | Translation                                         | Ribosomal proteins; synthesis and modification      | 50S ribosomal protein S20                              | R1318783  | 4.11E-07 | Polysaccharide | Proteobacteriales | Burkholderiales | Comamonadaceae | Comamonas       | Comamonas sp. B62024 |             |
| 102796_7   | Amino acid metabolism                               | Cyclic, linear and threonine metabolism             | Cyclic dihydroxyacetone (Dihydroxyacetone)             | R1318783  | 4.11E-07 | Polysaccharide | Proteobacteriales | Burkholderiales | Comamonadaceae | Comamonas       | Comamonas sp. B62024 |             |
| 162767_2   | Defense and invasion systems                        | Defense and invasion systems                        | Defense and invasion systems                           | R1318783  | 4.11E-07 | Polysaccharide | Proteobacteriales | Burkholderiales | Comamonadaceae | Comamonas       | Comamonas sp. B62024 |             |
| 184848_38  | Energy metabolism                                   | ATP synthase gamma chain                            | ATP synthase gamma chain                               | R1318783  | 4.11E-07 | Polysaccharide | Proteobacteriales | Burkholderiales | Comamonadaceae | Comamonas       | Comamonas sp. B62024 |             |
| 3218_2     | Intracellular trafficking, assembly, and processing | Protein export, secretion, and sorting              | Protein translocator subunit SecA                      | R1448456  | 7.76E-10 | Polysaccharide | Proteobacteriales | Burkholderiales | Comamonadaceae | Comamonas       | Comamonas sp. B62024 |             |
| 127907_5   | Translation                                         | Ribosomal proteins; synthesis and modification      | 50S ribosomal protein L6                               | R1318783  | 4.11E-07 | Polysaccharide | Proteobacteriales | Burkholderiales | Comamonadaceae | Comamonas       | Comamonas sp. B62024 |             |
| 107994_4   | Nucleic acid metabolism                             | Adenosine biosynthesis                              | Adenosine biosynthesis                                 | R1318783  | 4.11E-07 | Polysaccharide | Proteobacteriales | Burkholderiales | Comamonadaceae | Comamonas       | Comamonas sp. B62024 |             |
| 116471_3   | Intracellular trafficking, assembly, and processing | Peptidases                                          | Peptidoglycan-binding protein                          | R1329879  | 1.38E-11 | Polysaccharide | Proteobacteriales | Burkholderiales | Comamonadaceae | Comamonas       | Comamonas sp. B62024 |             |
| 132166_14  | Translation                                         | 16 S rRNA modification                              | RNA-directed RNA polymerase methyltransferase B        | R1277878  | 3.27E-08 | Polysaccharide | Proteobacteriales | Burkholderiales | Comamonadaceae | Comamonas       | Comamonas sp. B62024 |             |
| 29175_1    | Oxygen biosynthesis and metabolism                  | Photosynthesis                                      | Photosynthesis                                         | R1277878  | 3.27E-08 | Polysaccharide | Proteobacteriales | Burkholderiales | Comamonadaceae | Comamonas       | Comamonas sp. B62024 |             |
| 19320_2    | Transcription                                       | R polymerase                                        | DNA-directed RNA polymerase subunit beta               | R1253961  | 6.31E-14 | Polysaccharide | Proteobacteriales | Burkholderiales | Comamonadaceae | Comamonas       | Comamonas sp. B62024 |             |
| 61839_1    | Transport and binding proteins                      | Cations and iron carrying compounds                 | Ferrous iron transport protein B                       | R122704   | 1.15E-13 | Polysaccharide | Proteobacteriales | Burkholderiales | Comamonadaceae | Comamonas       | Comamonas sp. B62024 |             |
| 194392_4   | Amino acid metabolism                               | Amino acid and glutamate metabolism                 | Protein translocator subunit SecY                      | R118825   | 2.56E-07 | Polysaccharide | Proteobacteriales | Burkholderiales | Comamonadaceae | Comamonas       | Comamonas sp. B62024 |             |
| 163736_7   | Translation                                         | Ribosomal proteins; synthesis and modification      | 50S ribosomal protein S9                               | R1188448  | 7.93E-13 | Polysaccharide | Proteobacteriales | Burkholderiales | Comamonadaceae | Comamonas       | Comamonas sp. B62024 |             |
| 105276_9   | Energy metabolism                                   | Oxidative phosphorylation                           | ATP synthase subunit beta                              | R117183   | 8.85E-10 | Polysaccharide | Bacteroidetes     | Cytophagales    | Cytophagales   | Chryseolaceae   | Lawsontia            | Lawsontia   |
| 127786_4   | Transcription                                       | Intracellular trafficking, assembly, and processing | ATP dependent zinc metalloprotease FtsH                | R1039365  | 6.32E-11 | Polysaccharide | Proteobacteriales | Burkholderiales | Comamonadaceae | Comamonas       | Comamonas sp. B62024 |             |
| 36502_1    | Intracellular trafficking, assembly, and processing | Peptidases                                          | ATP dependent zinc metalloprotease FtsH                | R1039365  | 6.32E-11 | Polysaccharide | Proteobacteriales | Burkholderiales | Comamonadaceae | Comamonas       | Comamonas sp. B62024 |             |
| 104951_17  | Energy metabolism                                   | Oxidative phosphorylation                           | ATP dependent Clp protease ATP-binding subunit ClpA    | R1327433  | 7.44E-07 | Polysaccharide | Proteobacteriales | Burkholderiales | Comamonadaceae | Comamonas       | Comamonas sp. B62024 |             |
| 93821_1    | No files mapped out of 6 KOs                        | Chaperone and folding catalysis                     | Uncharacterized protein                                | R1327433  | 7.44E-07 | Polysaccharide | Proteobacteriales | Burkholderiales | Comamonadaceae | Comamonas       | Comamonas sp. B62024 |             |
| 104708_3   | Intracellular trafficking, assembly, and processing | Chaperone and folding catalysis                     | Uncharacterized protein                                | R1327433  | 7.44E-07 | Polysaccharide | Proteobacteriales | Burkholderiales | Comamonadaceae | Comamonas       | Comamonas sp. B62024 |             |
| 75477_5    | No files mapped out of 6 KOs                        | Chaperone and folding catalysis                     | Uncharacterized protein                                | R1327433  | 7.44E-07 | Polysaccharide | Proteobacteriales | Burkholderiales | Comamonadaceae | Comamonas       | Comamonas sp. B62024 |             |
| 158448_4   | Translation                                         | Ribosomal proteins; synthesis and modification      | 50S ribosomal protein L4                               | R1329879  | 1.38E-11 | Polysaccharide | Proteobacteriales | Burkholderiales | Comamonadaceae | Comamonas       | Comamonas sp. B62024 |             |
| 97402_2    | Translation                                         | Ribosomal proteins; synthesis and modification      | 50S rib                                                |           |          |                |                   |                 |                |                 |                      |             |

|           |                                |                                                     |                                                                     |           |          |                         |                                                            |                          |
|-----------|--------------------------------|-----------------------------------------------------|---------------------------------------------------------------------|-----------|----------|-------------------------|------------------------------------------------------------|--------------------------|
| 953939_4  | Transport and binding proteins | Amino acids, peptides and amines                    | Glutamate Aspartate periplasmic binding protein Gh1                 | 7.6067849 | 3.62E+14 | Polysaccharide Bacteria | Proteobacteriota/Betaproteobacteria/Burkholderia           | Comamonas Varioroux      |
| 21233_3   | Transition                     | Transfer R biogenesis                               | Polychlorinated naphthalene dioxygenase                             | 7.6072789 | 4.4E+14  | Polysaccharide Bacteria | Proteobacteriota/Betaproteobacteria/Burkholderia           | Comamonas Varioroux      |
| 19381_7   | Transition                     | Transcription factors                               | Cold shock protein CspC                                             | 7.6080784 | 4.24E+06 | Polysaccharide Bacteria | Firmicutes/Bacilli                                         | Bacillus                 |
| 153770_9  | Transition                     | Transcription factors                               | Floriger factor Tu                                                  | 7.6092789 | 1.0E+07  | Polysaccharide Bacteria | Firmicutes/Bacilli                                         | Bacillus                 |
| 54684_1   | Transition                     | Transfer R biogenesis                               | Proline-RNA ligase                                                  | 7.6094789 | 4.61E+13 | Polysaccharide Bacteria | Proteobacteriota/Betaproteobacteria/Burkholderia           | Comamonas Varioroux      |
| 108402_7  | No roles mapped out of 4 KOs   |                                                     | Not_u__linef                                                        | 7.6094883 | 3.88E+07 | Polysaccharide Bacteria | Proteobacteriota/Betaproteobacteria/Burkholderia           | Comamonas Varioroux      |
| 91148_3   | Transition                     | Ribosomal proteins; synthesis and modification      | 30S ribosomal protein S12                                           | 7.6098794 | 4.73E+07 | Polysaccharide Bacteria | Proteobacteriota/Betaproteobacteria/Burkholderia           | Comamonas Varioroux      |
| 31438_1   | Transition                     | Fatty acid and lipid metabolism                     | Fatty acid desaturase                                               | 7.6102386 | 9.58E+14 | Polysaccharide Bacteria | Proteobacteriota/Betaproteobacteria/Burkholderia           | Comamonas Varioroux      |
| 61764_3   | Transition                     | Ribosomal proteins; synthesis and modification      | 30S ribosomal protein L3                                            | 7.6103826 | 1.88E+07 | Polysaccharide Bacteria | Proteobacteriota/Betaproteobacteria/Burkholderia           | Methylthio               |
| 40610_1   | No roles mapped out of 4 KOs   |                                                     | Not_u__linef                                                        | 7.6107478 | 4.49E+07 | Polysaccharide Bacteria | Proteobacteriota/Betaproteobacteria/Burkholderia           | Lawsonia intracellularis |
| 118115_5  | No roles mapped out of 4 KOs   |                                                     | Not_u__linef                                                        | 7.6107529 | 6.21E+11 | Polysaccharide Bacteria | Chloroflexi/Chlorofleximorpha/Anaerolineae                 | Chloroflexus             |
| 111407_13 | No roles mapped out of 4 KOs   |                                                     | Not_u__linef                                                        | 7.6107871 | 4.69E+05 | Polysaccharide Bacteria | Nitrospirae/Nitrospirae                                    | Nitrospirae              |
| 8440_9    | Transition                     | Chaperone and folding catalysis                     | ATP-dependent Clp protease ATP-binding subunit ClpC                 | 7.6104749 | 1.79E+07 | Polysaccharide Bacteria | Proteobacteriota/Betaproteobacteria/Burkholderia           |                          |
| 67174_1   | Transition                     | Chaperone and folding catalysis                     | 30S ribosomal protein L4                                            | 7.6104277 | 1.81E+07 | Polysaccharide Bacteria | Proteobacteriota/Betaproteobacteria/Burkholderia           |                          |
| 71420_1   | Transition                     | General                                             | Polysaccharide kinase                                               | 7.6106170 | 1.18E+13 | Polysaccharide Bacteria | Actinobacteria                                             | Akkermansia              |
| 104668_1  | Transition                     | Oxidative phosphorylation                           | Nucleoside diphosphate flavoprotein subunit                         | 7.6105445 | 6.21E+14 | Polysaccharide Bacteria | Actinobacteria                                             | Akkermansia              |
| 29673_1   | No roles mapped out of 4 KOs   |                                                     | Not_u__linef                                                        | 7.6105682 | 1.63E+13 | Polysaccharide Bacteria | Proteobacteriota/Betaproteobacteria/Burkholderia           | Comamonas Varioroux      |
| 53085_2   | Transition                     | Chaperone and folding catalysis                     | Uncharacterized protein                                             | 7.6104779 | 8.22E+11 | Polysaccharide Bacteria | Proteobacteriota/Betaproteobacteria/Burkholderia           | Comamonas Varioroux      |
| 14516_4   | Transition                     | Ribosomal proteins; synthesis and modification      | 50S ribosomal protein L24                                           | 7.6104779 | 8.22E+11 | Polysaccharide Bacteria | Proteobacteriota/Betaproteobacteria/Burkholderia           | Comamonas Varioroux      |
| 88753_7   | Transition                     | Chaperone and folding catalysis                     | Uncharacterized protein                                             | 7.6104779 | 1.00E+07 | Polysaccharide Bacteria | Proteobacteriota/Betaproteobacteria/Burkholderia           | Comamonas Varioroux      |
| 2092_2    | Transition                     | Oxidative phosphorylation                           | NADH-quinone oxidoreductase subunit B                               | 7.6104276 | 1.48E+07 | Polysaccharide Bacteria | Proteobacteriota/Betaproteobacteria/Burkholderia           | Comamonas Varioroux      |
| 96383_2   | No roles mapped out of 4 KOs   |                                                     | Not_u__linef                                                        | 7.6103911 | 2.10E+07 | Polysaccharide Bacteria | Bacteroidetes/Chloroflexi/Chlorofleximorpha/Flavobacterium | Flavobacterium           |
| 57895_5   | Transition                     | Ribosomal proteins; synthesis and modification      | CAMP_b__b1_3 domain-containing protein                              | 7.6103911 | 2.10E+07 | Polysaccharide Bacteria | Bacteroidetes/Chloroflexi/Chlorofleximorpha/Flavobacterium | Flavobacterium           |
| 19363_1   | No roles mapped out of 4 KOs   |                                                     | Not_u__linef                                                        | 7.6103911 | 2.10E+07 | Polysaccharide Bacteria | Bacteroidetes/Chloroflexi/Chlorofleximorpha/Flavobacterium | Flavobacterium           |
| 159348_1  | Transition                     | Transfer R biogenesis                               | poly(ribonucleotide uridylyltransferase)                            | 7.6103911 | 2.10E+07 | Polysaccharide Bacteria | Bacteroidetes/Chloroflexi/Chlorofleximorpha/Flavobacterium | Flavobacterium           |
| 55091_3   | Transition                     | Amino acid metabolism                               | Valine, leucine and isoleucine metabolism                           | 7.6103911 | 2.10E+07 | Polysaccharide Bacteria | Bacteroidetes/Chloroflexi/Chlorofleximorpha/Flavobacterium | Flavobacterium           |
| 86490_8   | Transition                     | Transport and binding proteins                      | Perin and secretin                                                  | 7.6103911 | 2.10E+07 | Polysaccharide Bacteria | Bacteroidetes/Chloroflexi/Chlorofleximorpha/Flavobacterium | Flavobacterium           |
| 43841_1   | No roles mapped out of 4 KOs   |                                                     | Not_u__linef                                                        | 7.6103911 | 2.10E+07 | Polysaccharide Bacteria | Bacteroidetes/Chloroflexi/Chlorofleximorpha/Flavobacterium | Flavobacterium           |
| 172332_1  | Transition                     | Peptidases                                          | Onp-like domain-containing protein                                  | 7.6103911 | 2.10E+07 | Polysaccharide Bacteria | Bacteroidetes/Chloroflexi/Chlorofleximorpha/Flavobacterium | Flavobacterium           |
| 172332_1  | Transition                     | Peptidases                                          | ATP-dependent zinc metalloprotease FtsH                             | 7.6103911 | 2.10E+07 | Polysaccharide Bacteria | Bacteroidetes/Chloroflexi/Chlorofleximorpha/Flavobacterium | Flavobacterium           |
| 149714_7  | No roles mapped out of 4 KOs   |                                                     | Not_u__linef                                                        | 7.6103911 | 2.10E+07 | Polysaccharide Bacteria | Bacteroidetes/Chloroflexi/Chlorofleximorpha/Flavobacterium | Flavobacterium           |
| 78180_1   | No roles mapped out of 4 KOs   |                                                     | Not_u__linef                                                        | 7.6103911 | 2.10E+07 | Polysaccharide Bacteria | Bacteroidetes/Chloroflexi/Chlorofleximorpha/Flavobacterium | Flavobacterium           |
| 141911_1  | Transition                     | Peptidases                                          | Uncharacterized protein (Fragment)                                  | 7.6103911 | 2.10E+07 | Polysaccharide Bacteria | Bacteroidetes/Chloroflexi/Chlorofleximorpha/Flavobacterium | Flavobacterium           |
| 141911_1  | Transition                     | Peptidases                                          | 30S ribosomal protein L28                                           | 7.6103911 | 2.10E+07 | Polysaccharide Bacteria | Bacteroidetes/Chloroflexi/Chlorofleximorpha/Flavobacterium | Flavobacterium           |
| 141911_1  | Transition                     | Peptidases                                          | Protein HPS                                                         | 7.6103911 | 2.10E+07 | Polysaccharide Bacteria | Bacteroidetes/Chloroflexi/Chlorofleximorpha/Flavobacterium | Flavobacterium           |
| 141911_1  | Transition                     | Peptidases                                          | Not_u__linef                                                        | 7.6103911 | 2.10E+07 | Polysaccharide Bacteria | Bacteroidetes/Chloroflexi/Chlorofleximorpha/Flavobacterium | Flavobacterium           |
| 141911_1  | Transition                     | Peptidases                                          | 30S ribosomal protein S1                                            | 7.6103911 | 2.10E+07 | Polysaccharide Bacteria | Bacteroidetes/Chloroflexi/Chlorofleximorpha/Flavobacterium | Flavobacterium           |
| 86149_9   | Transition                     | Nucleic acid metabolism                             | RNA polymerase subunit beta                                         | 7.6103911 | 2.10E+07 | Polysaccharide Bacteria | Bacteroidetes/Chloroflexi/Chlorofleximorpha/Flavobacterium | Flavobacterium           |
| 153216_6  | Transition                     | Fatty acid and lipid metabolism                     | Acyl carrier protein                                                | 7.6103911 | 2.10E+07 | Polysaccharide Bacteria | Bacteroidetes/Chloroflexi/Chlorofleximorpha/Flavobacterium | Flavobacterium           |
| 9387_13   | Transition                     | Ribosomal proteins; synthesis and modification      | 30S ribosomal protein S3                                            | 7.6103911 | 2.10E+07 | Polysaccharide Bacteria | Bacteroidetes/Chloroflexi/Chlorofleximorpha/Flavobacterium | Flavobacterium           |
| 141626_1  | Transition                     | Carbohydrate metabolism                             | Acetyl-coenzyme A synthetase                                        | 7.6103911 | 2.10E+07 | Polysaccharide Bacteria | Bacteroidetes/Chloroflexi/Chlorofleximorpha/Flavobacterium | Flavobacterium           |
| 75437_2   | Transition                     | Ribosomal proteins; synthesis and modification      | 30S ribosomal protein S9                                            | 7.6103911 | 2.10E+07 | Polysaccharide Bacteria | Bacteroidetes/Chloroflexi/Chlorofleximorpha/Flavobacterium | Flavobacterium           |
| 99328_3   | Transition                     | Oxidative phosphorylation                           | ATP synthase subunit epsilon                                        | 7.6103911 | 2.10E+07 | Polysaccharide Bacteria | Bacteroidetes/Chloroflexi/Chlorofleximorpha/Flavobacterium | Flavobacterium           |
| 94251_1   | Transition                     | Cell structure, growth, and death                   | Cell division                                                       | 7.6103911 | 2.10E+07 | Polysaccharide Bacteria | Bacteroidetes/Chloroflexi/Chlorofleximorpha/Flavobacterium | Flavobacterium           |
| 709133_2  | Transition                     | Ribosomal proteins; synthesis and modification      | Cell division                                                       | 7.6103911 | 2.10E+07 | Polysaccharide Bacteria | Bacteroidetes/Chloroflexi/Chlorofleximorpha/Flavobacterium | Flavobacterium           |
| 209754_12 | Transition                     | Ribosomal proteins; synthesis and modification      | 50S ribosomal protein L14                                           | 7.6103911 | 2.10E+07 | Polysaccharide Bacteria | Bacteroidetes/Chloroflexi/Chlorofleximorpha/Flavobacterium | Flavobacterium           |
| 102756_1  | Transition                     | Amino acid metabolism                               | Alanine, aspartate and glutamate metabolism                         | 7.6103911 | 2.10E+07 | Polysaccharide Bacteria | Bacteroidetes/Chloroflexi/Chlorofleximorpha/Flavobacterium | Flavobacterium           |
| 170354_6  | Transition                     | Carbohydrate metabolism                             | Phosphoglucomutase                                                  | 7.6103911 | 2.10E+07 | Polysaccharide Bacteria | Bacteroidetes/Chloroflexi/Chlorofleximorpha/Flavobacterium | Flavobacterium           |
| 141776_4  | Transition                     | Amino acid, peptides and amines                     | Transfer chain amino acid ABC transporter substrate-binding protein | 7.6103911 | 2.10E+07 | Polysaccharide Bacteria | Bacteroidetes/Chloroflexi/Chlorofleximorpha/Flavobacterium | Flavobacterium           |
| 180801_30 | Transition                     | Ribosomal proteins; synthesis and modification      | 30S ribosomal protein S16                                           | 7.6103911 | 2.10E+07 | Polysaccharide Bacteria | Bacteroidetes/Chloroflexi/Chlorofleximorpha/Flavobacterium | Flavobacterium           |
| 52523_1   | Transition                     | Ribosomal proteins; synthesis and modification      | 30S ribosomal protein S17                                           | 7.6103911 | 2.10E+07 | Polysaccharide Bacteria | Bacteroidetes/Chloroflexi/Chlorofleximorpha/Flavobacterium | Flavobacterium           |
| 977_4     | Transition                     | Nucleic acid metabolism                             | Protein RcaA                                                        | 7.6103911 | 2.10E+07 | Polysaccharide Bacteria | Bacteroidetes/Chloroflexi/Chlorofleximorpha/Flavobacterium | Flavobacterium           |
| 15570_14  | Transition                     | Ribosomal proteins; synthesis and modification      | 30S ribosomal protein L19                                           | 7.6103911 | 2.10E+07 | Polysaccharide Bacteria | Bacteroidetes/Chloroflexi/Chlorofleximorpha/Flavobacterium | Flavobacterium           |
| 119200_3  | Transition                     | Ribosomal proteins; synthesis and modification      | 50S ribosomal protein L5                                            | 7.6103911 | 2.10E+07 | Polysaccharide Bacteria | Bacteroidetes/Chloroflexi/Chlorofleximorpha/Flavobacterium | Flavobacterium           |
| 92125_2   | Transition                     | Cytosolic and methionine metabolism                 | Methionine synthase                                                 | 7.6103911 | 2.10E+07 | Polysaccharide Bacteria | Bacteroidetes/Chloroflexi/Chlorofleximorpha/Flavobacterium | Flavobacterium           |
| 108890_5  | Transition                     | Oxidative phosphorylation                           | Nucleoside diphosphate polyphosphate II                             | 7.6103911 | 2.10E+07 | Polysaccharide Bacteria | Bacteroidetes/Chloroflexi/Chlorofleximorpha/Flavobacterium | Flavobacterium           |
| 710384_2  | Transition                     | Nucleic acid metabolism                             | Superoxide dismutase                                                | 7.6103911 | 2.10E+07 | Polysaccharide Bacteria | Bacteroidetes/Chloroflexi/Chlorofleximorpha/Flavobacterium | Flavobacterium           |
| 52645_6   | Transition                     | Nucleic acid metabolism                             | Uncharacterized protein                                             | 7.6103911 | 2.10E+07 | Polysaccharide Bacteria | Bacteroidetes/Chloroflexi/Chlorofleximorpha/Flavobacterium | Flavobacterium           |
| 107870_3  | Transition                     | Ribosomal proteins; synthesis and modification      | 30S ribosomal protein S2                                            | 7.6103911 | 2.10E+07 | Polysaccharide Bacteria | Bacteroidetes/Chloroflexi/Chlorofleximorpha/Flavobacterium | Flavobacterium           |
| 157979_2  | Transition                     | Cell structure, growth, and death                   | GapM1 family protein                                                | 7.6103911 | 2.10E+07 | Polysaccharide Bacteria | Bacteroidetes/Chloroflexi/Chlorofleximorpha/Flavobacterium | Flavobacterium           |
| 2656_5    | Transition                     | No roles mapped out of 4 KOs                        | Not_u__linef                                                        | 7.6103911 | 2.10E+07 | Polysaccharide Bacteria | Bacteroidetes/Chloroflexi/Chlorofleximorpha/Flavobacterium | Flavobacterium           |
| 172780_1  | Transition                     | Ribosomal proteins; synthesis and modification      | 30S ribosomal protein L1                                            | 7.6103911 | 2.10E+07 | Polysaccharide Bacteria | Bacteroidetes/Chloroflexi/Chlorofleximorpha/Flavobacterium | Flavobacterium           |
| 154161_27 | Transition                     | Ribosomal proteins; synthesis and modification      | Not_u__linef                                                        | 7.6103911 | 2.10E+07 | Polysaccharide Bacteria | Bacteroidetes/Chloroflexi/Chlorofleximorpha/Flavobacterium | Flavobacterium           |
| 31448_4   | Transition                     | Nucleic acid metabolism                             | Nucleoside associated protein VAP_A_124700                          | 7.6103911 | 2.10E+07 | Polysaccharide Bacteria | Bacteroidetes/Chloroflexi/Chlorofleximorpha/Flavobacterium | Flavobacterium           |
| 103547_9  | Transition                     | Unknown function                                    | Uncharacterized protein                                             | 7.6103911 | 2.10E+07 | Polysaccharide Bacteria | Bacteroidetes/Chloroflexi/Chlorofleximorpha/Flavobacterium | Flavobacterium           |
| 54684_2   | Transition                     | Energy metabolism                                   | Carbon fixation in prokaryotes                                      | 7.6103911 | 2.10E+07 | Polysaccharide Bacteria | Bacteroidetes/Chloroflexi/Chlorofleximorpha/Flavobacterium | Flavobacterium           |
| 192010_3  | Transition                     | Defense and invasion systems                        | Cellulose and inactivation                                          | 7.6103911 | 2.10E+07 | Polysaccharide Bacteria | Bacteroidetes/Chloroflexi/Chlorofleximorpha/Flavobacterium | Flavobacterium           |
| 165616_6  | Transition                     | Regulation functions                                | Regulation functions                                                | 7.6103911 | 2.10E+07 | Polysaccharide Bacteria | Bacteroidetes/Chloroflexi/Chlorofleximorpha/Flavobacterium | Flavobacterium           |
| 60546_1   | Transition                     | No roles mapped out of 4 KOs                        | Not_u__linef                                                        | 7.6103911 | 2.10E+07 | Polysaccharide Bacteria | Bacteroidetes/Chloroflexi/Chlorofleximorpha/Flavobacterium | Flavobacterium           |
| 30739_4   | Transition                     | No roles mapped out of 4 KOs                        | Not_u__linef                                                        | 7.6103911 | 2.10E+07 | Polysaccharide Bacteria | Bacteroidetes/Chloroflexi/Chlorofleximorpha/Flavobacterium | Flavobacterium           |
| 121782_3  | Transition                     | Ribosomal proteins; synthesis and modification      | Oxidative phosphorylation                                           | 7.6103911 | 2.10E+07 | Polysaccharide Bacteria | Bacteroidetes/Chloroflexi/Chlorofleximorpha/Flavobacterium | Flavobacterium           |
| 20479_3   | Transition                     | Energy metabolism                                   | NADH-quinone oxidoreductase subunit A                               | 7.6103911 | 2.10E+07 | Polysaccharide Bacteria | Bacteroidetes/Chloroflexi/Chlorofleximorpha/Flavobacterium | Flavobacterium           |
| 151931_5  | Transition                     | Ribosomal proteins; synthesis and modification      | 30S ribosomal protein S1                                            | 7.6103911 | 2.10E+07 | Polysaccharide Bacteria | Bacteroidetes/Chloroflexi/Chlorofleximorpha/Flavobacterium | Flavobacterium           |
| 127268_5  | Transition                     | Ribosomal proteins; synthesis and modification      | 30S ribosomal protein S13                                           | 7.6103911 | 2.10E+07 | Polysaccharide Bacteria | Bacteroidetes/Chloroflexi/Chlorofleximorpha/Flavobacterium | Flavobacterium           |
| 108653_2  | Transition                     | Energy metabolism                                   | Uncharacterized protein                                             | 7.6103911 | 2.10E+07 | Polysaccharide Bacteria | Bacteroidetes/Chloroflexi/Chlorofleximorpha/Flavobacterium | Flavobacterium           |
| 99701_3   | Transition                     | Ribosomal proteins; synthesis and modification      | 30S ribosomal protein S14                                           | 7.6103911 | 2.10E+07 | Polysaccharide Bacteria | Bacteroidetes/Chloroflexi/Chlorofleximorpha/Flavobacterium | Flavobacterium           |
| 128172_10 | Transition                     | Carbohydrate metabolism                             | Phosphoglucomutase                                                  | 7.6103911 | 2.10E+07 | Polysaccharide Bacteria | Bacteroidetes/Chloroflexi/Chlorofleximorpha/Flavobacterium | Flavobacterium           |
| 448379_11 | Transition                     | Ribosomal proteins; synthesis and modification      | 30S ribosomal protein S8                                            | 7.6103911 | 2.10E+07 | Polysaccharide Bacteria | Bacteroidetes/Chloroflexi/Chlorofleximorpha/Flavobacterium | Flavobacterium           |
| 33878_3   | Transition                     | Carbohydrate metabolism                             | Maltose dehydrogenase                                               | 7.6103911 | 2.10E+07 | Polysaccharide Bacteria | Bacteroidetes/Chloroflexi/Chlorofleximorpha/Flavobacterium | Flavobacterium           |
| 164668_8  | Transition                     | Carbohydrate metabolism                             | Crizate cycle (TC4 cycle)                                           | 7.6103911 | 2.10E+07 | Polysaccharide Bacteria | Bacteroidetes/Chloroflexi/Chlorofleximorpha/Flavobacterium | Flavobacterium           |
| 164738_2  | Transition                     | intracellular trafficking, assembly, and processing | Chaperone and folding catalysis                                     | 7.6103911 | 2.10E+07 | Polysaccharide Bacteria | Bacteroidetes/Chloroflexi/Chlorofleximorpha/Flavobacterium | Flavobacterium           |
| 141776_4  | Transition                     | intracellular trafficking, assembly, and processing | Chaperone and folding catalysis                                     | 7.6103911 | 2.10E+07 | Polysaccharide Bacteria | Bacteroidetes/Chloroflexi/Chlorofleximorpha/Flavobacterium | Flavobacterium           |
| 152749_2  | Transition                     | intracellular trafficking, assembly, and processing | Protein export, secretion, and sorting                              | 7.6103911 | 2.10E+07 | Polysaccharide Bacteria | Bacteroidetes/Chloroflexi/Chlorofleximorpha/Flavobacterium | Flavobacterium           |
| 108890_5  | Transition                     | Energy metabolism                                   | Transfer R biogenesis                                               | 7.6103911 | 2.10E+07 | Polysaccharide Bacteria | Bacteroidetes/Chloroflexi/Chlorofleximorpha/Flavobacterium | Flavobacterium           |
| 81121_5   | Transition                     | Amino acid metabolism                               | Phenylalanine, tyrosine and tryptophan biosynthesis                 | 7.6103911 | 2.10E+07 | Polysaccharide Bacteria | Bacteroidetes/Chloroflexi/Chlorofleximorpha/Flavobacterium | Flavobacterium           |
| 45474_3   | Transition                     | No roles mapped out of 4 KOs                        | Not_u__linef                                                        | 7.6103911 | 2.10E+07 | Polysaccharide Bacteria | Bacteroidetes/Chloroflexi/Chlorofleximorpha/Flavobacterium | Flavobacterium           |
| 121888_2  | Transition                     | No roles mapped out of 4 KOs                        | Not_u__linef                                                        | 7.6103911 | 2.10E+07 | Polysaccharide Bacteria | Bacteroidetes/Chloroflexi/Chlorofleximorpha/Flavobacterium | Flavobacterium           |
| 151877_3  | Transition                     | Transcription factors                               | Transcription factors                                               | 7.6103911 | 2.10E+07 | Polysaccharide Bacteria | Bacteroidetes/Chloroflexi/Chlorofleximorpha/Flavobacterium | Flavobacterium           |
| 160020_4  | Transition                     | Energy metabolism                                   | Transcription termination/antitermination protein NusG              | 7.6103911 | 2.10E+07 | Polysaccharide Bacteria | Bacteroidetes/Chloroflexi/Chlorofleximorpha/Flavobacterium | Flavobacterium           |
| 104268_16 | Transition                     | Transcription factors                               | Transcription termination/antitermination protein NusA              | 7.6103911 | 2.10E+07 | Polysaccharide Bacteria | Bacteroidetes/Chloroflexi/Chlorofleximorpha/Flavobacterium | Flavobacterium           |
| 98189_3   | Transition                     | intracellular trafficking, assembly, and processing | Enzyme assembly                                                     | 7.6103911 | 2.10E+07 | Polysaccharide Bacteria | Bacteroidetes/Chloroflexi/Chlorofleximorpha/Flavobacterium | Flavobacterium           |
| 94307_1   | Transition                     | No roles mapped out of 4 KOs                        | Not_u__linef                                                        | 7.6103911 | 2.10E+07 | Polysaccharide Bacteria | Bacteroidetes/Chloroflexi/Chlorofleximorpha/Flavobacterium | Flavobacterium           |
| 102426_1  | Transition                     | Energy metabolism                                   | Cytochrome oxidase/beta subunit 1                                   | 7.6103911 | 2.10E+07 | Polysaccharide Bacteria | Bacteroidetes/Chloroflexi/Chlorofleximorpha/Flavobacterium | Flavobacterium           |
| 9438_2    | Transition                     | Oxidative phosphorylation                           | Cytochrome oxidase/beta subunit 2                                   | 7.6103911 | 2.10E+07 | Polysaccharide Bacteria | Bacteroid                                                  |                          |

|           |                                                     |                                                |                                             |          |          |                      |               |                     |                  |                  |                    |
|-----------|-----------------------------------------------------|------------------------------------------------|---------------------------------------------|----------|----------|----------------------|---------------|---------------------|------------------|------------------|--------------------|
| 63899.1   | No roles mapped out of 4 KOs                        |                                                | Uncharacterized protein                     | 68496514 | 8.47E-02 | Polysaccharide Lyase | Streptomyces  | Solanicus           | Solanaceae       | Capisicum        | Capisicum chinense |
| 145163.1  | Energy metabolism                                   | Oxidative phosphorylation                      | Iron-sulfur cluster oxidase subunit 1       | 68097068 | 1.54E-02 | Polysaccharide Lyase | Proteobacter  | Gammaproteobacteria | Sarcomonadaceae  | Sarcomonadaceae  | Sarcomonadaceae    |
| 152926.3  | Translocation                                       | Ribosomal proteins; synthesis and modification | 50S ribosomal protein L35                   | 68873020 | 3.06E-08 | Polysaccharide Lyase | Proteobacter  | Alphaproteobacteria | Rhodospirillales | Rhodospirillales | Rhodospirillales   |
| 151774.9  | Translocation                                       | Defensin and invasion systems                  | Phage tail sheath protein                   | 68427314 | 1.36E-02 | Polysaccharide Lyase | Proteobacter  | Betaproteobacteria  | Burkholderiales  | Burkholderiales  | Burkholderiales    |
| 33695.1   | Transcription                                       | R polymerase                                   | DNA-directed RNA polymerase subunit beta'   | 64792285 | 2.51E-06 | Polysaccharide Lyase | Bacteroidetes | Chloroflexi         | Chloroflexiales  | Chloroflexiales  | Chloroflexiales    |
| 76122.7   | Carbohydrate metabolism                             | Glycolysis / Gluconeogenesis                   | Fructose 1,6-bisphosphate aldolase          | 68779126 | 6.03E-02 | Polysaccharide Lyase | taxonomic_    | annotation_         | available        |                  |                    |
| 13397.7   | Defense and invasion systems                        | Detoxification and inactivation                | Allyl sulfonamide lyase C                   | 64751131 | 1.13E-07 | Polysaccharide Lyase | taxonomic_    | annotation_         | available        |                  |                    |
| 163320.26 | No roles mapped out of 4 KOs                        | Transcription                                  | Uncharacterized protein                     | 64713689 | 1.88E-15 | Polysaccharide Lyase | Proteobacter  | Gammaproteobacteria | Pseudomonadales  | Pseudomonadales  | Pseudomonadales    |
| 96070.6   | Translocation                                       | Transfers R biogenesis                         | Phosphoenolpyruvate carboxylase C           | 64704123 | 1.44E-02 | Polysaccharide Lyase | Proteobacter  | Betaproteobacteria  | Comamonadales    | Comamonadales    | Comamonadales      |
| 122820.5  | Transport and binding proteins                      | Cations and iron carrying compounds            | Iron transporter ynfA                       | 64700746 | 1.28E-14 | Polysaccharide Lyase | Bacteroidetes | Flavobacteriia      | Flavobacteriia   | Flavobacteriia   | Flavobacteriia     |
| 105214.2  | Transport and binding proteins                      | Energy metabolism                              | Phosphoenolpyruvate carboxylase             | 64697369 | 4.66E-12 | Polysaccharide Lyase | Proteobacter  | Betaproteobacteria  | Comamonadales    | Comamonadales    | Comamonadales      |
| 78164.4   | Energy metabolism                                   | Oxidative phosphorylation                      | ATP synthase subunit alpha                  | 64660221 | 1.30E-05 | Polysaccharide Lyase | Arthropoda    | Insecta             | Phasmodata       | Bacillales       | Bacillales         |
| 110171.18 | Energy metabolism                                   | Oxidative phosphorylation                      | NADH quinone oxidoreductase subunit B       | 64662372 | 0.000200 | Polysaccharide Lyase | Actinobacter  | Thermoplasma        | Solirubrobact    | Solirubrobact    | Solirubrobact      |
| 103431.4  | No roles mapped out of 4 KOs                        | Translocation                                  | 50S ribosomal protein 18                    | 64660814 | 3.03E-02 | Polysaccharide Lyase | Proteobacter  | Betaproteobacteria  | Comamonadales    | Comamonadales    | Comamonadales      |
| 20595.4   | Regulatory functions                                | Protein interactions                           | Family 20 glycosyltransferase               | 64651385 | 1.05E-02 | Polysaccharide Lyase | Bacteroidetes | Flavobacteriia      | Marinilabidiales | Marinilabidiales | Corynebacteriales  |
| 99709.9   | Intracellular trafficking, assembly, and processing | Chaperone and folding catalysts                | Uncharacterized protein                     | 64646641 | 3.15E-08 | Polysaccharide Lyase | taxonomic_    | annotation_         | available        |                  |                    |
| 49461.5   | No roles mapped out of 4 KOs                        | Translocation                                  | Uncharacterized protein                     | 64643963 | 1.14E-02 | Polysaccharide Lyase | Firmicutes    | Bacilli             | Bacillales       | Paenibacillales  | Paenibacillales    |
| 164524.6  | Nucleic acid metabolism                             | Pyrimidine metabolism                          | Nucleic acid metabolic byproduct release    | 64643129 | 2.25E-11 | Polysaccharide Lyase | Proteobacter  | Betaproteobacteria  | Burkholderiales  | Comamonadales    | Mutulisporales     |
| 67374.3   | Transcription                                       | R polymerase                                   | DNA-directed RNA polymerase subunit alpha   | 64643424 | 3.62E-10 | Polysaccharide Lyase | Proteobacter  | Betaproteobacteria  | Burkholderiales  | Comamonadales    | Comamonadales      |
| 154510.1  | No roles mapped out of 4 KOs                        | Translocation                                  | Uncharacterized protein                     | 64639709 | 2.37E-15 | Polysaccharide Lyase | Proteobacter  | Betaproteobacteria  | Burkholderiales  | Comamonadales    | Comamonadales      |
| 145510.3  | Carbohydrate metabolism                             | Glycolysis / Gluconeogenesis                   | Cytidine diphosphate dehydrogenase 1        | 64625786 | 1.06E-05 | Polysaccharide Lyase | Proteobacter  | Betaproteobacteria  | Burkholderiales  | Comamonadales    | Comamonadales      |
| 125564.2  | Intracellular trafficking, assembly, and processing | Chaperone and folding catalysts                | Enolase                                     | 64620069 | 2.94E-08 | Polysaccharide Lyase | Arthropoda    | Insecta             | Phasmodata       | Bacillales       | Bacillales         |
| 18179.6   | Transport and binding proteins                      | Antions                                        | Tricyclic transporter protein TCC           | 64619798 | 6.57E-08 | Polysaccharide Lyase | Proteobacter  | Betaproteobacteria  | Burkholderiales  | Burkholderiales  | Burkholderiales    |
| 20567.3   | Nucleic acid metabolism                             | Pyrimidine metabolism                          | Chaperone phosphoribosyltransferase         | 64618771 | 1.25E-02 | Polysaccharide Lyase | Proteobacter  | Betaproteobacteria  | Burkholderiales  | Comamonadales    | Comamonadales      |
| 12704.3   | Energy metabolism                                   | Oxidative phosphorylation                      | ATP synthase subunit beta                   | 64618647 | 7.03E-08 | Polysaccharide Lyase | taxonomic_    | annotation_         | available        |                  |                    |
| 164958.6  | No roles mapped out of 4 KOs                        | Translocation                                  | Uncharacterized protein                     | 64618245 | 6.38E-13 | Polysaccharide Lyase | Proteobacter  | Betaproteobacteria  | Burkholderiales  | Comamonadales    | Comamonadales      |
| 164996.1  | No roles mapped out of 4 KOs                        | Translocation                                  | Uncharacterized protein                     | 64618119 | 7.67E-07 | Polysaccharide Lyase | Actinobacter  | Bacteroidetes       | Acidobacteriales | Acidobacteriales | Acidobacteriales   |
| 186817.8  | Intracellular trafficking, assembly, and processing | Protein modification and repair                | Deoxythymine synthase                       | 64618021 | 4.51E-10 | Polysaccharide Lyase | Arthropoda    | Insecta             | Phasmodata       | Bacillales       | Bacillales         |
| 155791.20 | Cell structure, growth, and death                   | Spore formation and germination                | SpoIV family protein                        | 64617733 | 7.96E-08 | Polysaccharide Lyase | Proteobacter  | Hydrogenophiles     | Hydrogenophiles  | Hydrogenophiles  | Hydrogenophiles    |
| 193299.14 | No roles mapped out of 4 KOs                        | Translocation                                  | 50S ribosomal protein S10                   | 64617528 | 1.47E-02 | Polysaccharide Lyase | Arthropoda    | Insecta             | Phasmodata       | Bacillales       | Bacillales         |
| 193299.14 | No roles mapped out of 4 KOs                        | Translocation                                  | Uncharacterized protein                     | 64617441 | 3.52E-02 | Polysaccharide Lyase | Arthropoda    | Insecta             | Phasmodata       | Bacillales       | Bacillales         |
| 49022.4   | Intracellular trafficking, assembly, and processing | Chaperone and folding catalysts                | Regulatory protein sigma 70 class I isozyme | 64617274 | 1.34E-02 | Polysaccharide Lyase | Proteobacter  | Betaproteobacteria  | Burkholderiales  | Comamonadales    | Comamonadales      |
| 185153.4  | Nucleic acid metabolism                             | Pyrimidine metabolism                          | Thymidine reductase                         | 64617181 | 1.84E-02 | Polysaccharide Lyase | Proteobacter  | Betaproteobacteria  | Burkholderiales  | Comamonadales    | Comamonadales      |
| 185153.4  | Nucleic acid metabolism                             | Pyrimidine metabolism                          | Thymidine reductase                         | 64617181 | 1.84E-02 | Polysaccharide Lyase | Proteobacter  | Betaproteobacteria  | Burkholderiales  | Comamonadales    | Comamonadales      |
| 185153.4  | Nucleic acid metabolism                             | Pyrimidine metabolism                          | Thymidine reductase                         | 64617181 | 1.84E-02 | Polysaccharide Lyase | Proteobacter  | Betaproteobacteria  | Burkholderiales  | Comamonadales    | Comamonadales      |
| 185153.4  | Nucleic acid metabolism                             | Pyrimidine metabolism                          | Thymidine reductase                         | 64617181 | 1.84E-02 | Polysaccharide Lyase | Proteobacter  | Betaproteobacteria  | Burkholderiales  | Comamonadales    | Comamonadales      |
| 185153.4  | Nucleic acid metabolism                             | Pyrimidine metabolism                          | Thymidine reductase                         | 64617181 | 1.84E-02 | Polysaccharide Lyase | Proteobacter  | Betaproteobacteria  | Burkholderiales  | Comamonadales    | Comamonadales      |
| 185153.4  | Nucleic acid metabolism                             | Pyrimidine metabolism                          | Thymidine reductase                         | 64617181 | 1.84E-02 | Polysaccharide Lyase | Proteobacter  | Betaproteobacteria  | Burkholderiales  | Comamonadales    | Comamonadales      |
| 185153.4  | Nucleic acid metabolism                             | Pyrimidine metabolism                          | Thymidine reductase                         | 64617181 | 1.84E-02 | Polysaccharide Lyase | Proteobacter  | Betaproteobacteria  | Burkholderiales  | Comamonadales    | Comamonadales      |
| 185153.4  | Nucleic acid metabolism                             | Pyrimidine metabolism                          | Thymidine reductase                         | 64617181 | 1.84E-02 | Polysaccharide Lyase | Proteobacter  | Betaproteobacteria  | Burkholderiales  | Comamonadales    | Comamonadales      |
| 185153.4  | Nucleic acid metabolism                             | Pyrimidine metabolism                          | Thymidine reductase                         | 64617181 | 1.84E-02 | Polysaccharide Lyase | Proteobacter  | Betaproteobacteria  | Burkholderiales  | Comamonadales    | Comamonadales      |
| 185153.4  | Nucleic acid metabolism                             | Pyrimidine metabolism                          | Thymidine reductase                         | 64617181 | 1.84E-02 | Polysaccharide Lyase | Proteobacter  | Betaproteobacteria  | Burkholderiales  | Comamonadales    | Comamonadales      |
| 185153.4  | Nucleic acid metabolism                             | Pyrimidine metabolism                          | Thymidine reductase                         | 64617181 | 1.84E-02 | Polysaccharide Lyase | Proteobacter  | Betaproteobacteria  | Burkholderiales  | Comamonadales    | Comamonadales      |
| 185153.4  | Nucleic acid metabolism                             | Pyrimidine metabolism                          | Thymidine reductase                         | 64617181 | 1.84E-02 | Polysaccharide Lyase | Proteobacter  | Betaproteobacteria  | Burkholderiales  | Comamonadales    | Comamonadales      |
| 185153.4  | Nucleic acid metabolism                             | Pyrimidine metabolism                          | Thymidine reductase                         | 64617181 | 1.84E-02 | Polysaccharide Lyase | Proteobacter  | Betaproteobacteria  | Burkholderiales  | Comamonadales    | Comamonadales      |
| 185153.4  | Nucleic acid metabolism                             | Pyrimidine metabolism                          | Thymidine reductase                         | 64617181 | 1.84E-02 | Polysaccharide Lyase | Proteobacter  | Betaproteobacteria  | Burkholderiales  | Comamonadales    | Comamonadales      |
| 185153.4  | Nucleic acid metabolism                             | Pyrimidine metabolism                          | Thymidine reductase                         | 64617181 | 1.84E-02 | Polysaccharide Lyase | Proteobacter  | Betaproteobacteria  | Burkholderiales  | Comamonadales    | Comamonadales      |
| 185153.4  | Nucleic acid metabolism                             | Pyrimidine metabolism                          | Thymidine reductase                         | 64617181 | 1.84E-02 | Polysaccharide Lyase | Proteobacter  | Betaproteobacteria  | Burkholderiales  | Comamonadales    | Comamonadales      |
| 185153.4  | Nucleic acid metabolism                             | Pyrimidine metabolism                          | Thymidine reductase                         | 64617181 | 1.84E-02 | Polysaccharide Lyase | Proteobacter  | Betaproteobacteria  | Burkholderiales  | Comamonadales    | Comamonadales      |
| 185153.4  | Nucleic acid metabolism                             | Pyrimidine metabolism                          | Thymidine reductase                         | 64617181 | 1.84E-02 | Polysaccharide Lyase | Proteobacter  | Betaproteobacteria  | Burkholderiales  | Comamonadales    | Comamonadales      |
| 185153.4  | Nucleic acid metabolism                             | Pyrimidine metabolism                          | Thymidine reductase                         | 64617181 | 1.84E-02 | Polysaccharide Lyase | Proteobacter  | Betaproteobacteria  | Burkholderiales  | Comamonadales    | Comamonadales      |
| 185153.4  | Nucleic acid metabolism                             | Pyrimidine metabolism                          | Thymidine reductase                         | 64617181 | 1.84E-02 | Polysaccharide Lyase | Proteobacter  | Betaproteobacteria  | Burkholderiales  | Comamonadales    | Comamonadales      |
| 185153.4  | Nucleic acid metabolism                             | Pyrimidine metabolism                          | Thymidine reductase                         | 64617181 | 1.84E-02 | Polysaccharide Lyase | Proteobacter  | Betaproteobacteria  | Burkholderiales  | Comamonadales    | Comamonadales      |
| 185153.4  | Nucleic acid metabolism                             | Pyrimidine metabolism                          | Thymidine reductase                         | 64617181 | 1.84E-02 | Polysaccharide Lyase | Proteobacter  | Betaproteobacteria  | Burkholderiales  | Comamonadales    | Comamonadales      |
| 185153.4  | Nucleic acid metabolism                             | Pyrimidine metabolism                          | Thymidine reductase                         | 64617181 | 1.84E-02 | Polysaccharide Lyase | Proteobacter  | Betaproteobacteria  | Burkholderiales  | Comamonadales    | Comamonadales      |
| 185153.4  | Nucleic acid metabolism                             | Pyrimidine metabolism                          | Thymidine reductase                         | 64617181 | 1.84E-02 | Polysaccharide Lyase | Proteobacter  | Betaproteobacteria  | Burkholderiales  | Comamonadales    | Comamonadales      |
| 185153.4  | Nucleic acid metabolism                             | Pyrimidine metabolism                          | Thymidine reductase                         | 64617181 | 1.84E-02 | Polysaccharide Lyase | Proteobacter  | Betaproteobacteria  | Burkholderiales  | Comamonadales    | Comamonadales      |
| 185153.4  | Nucleic acid metabolism                             | Pyrimidine metabolism                          | Thymidine reductase                         | 64617181 | 1.84E-02 | Polysaccharide Lyase | Proteobacter  | Betaproteobacteria  | Burkholderiales  | Comamonadales    | Comamonadales      |
| 185153.4  | Nucleic acid metabolism                             | Pyrimidine metabolism                          | Thymidine reductase                         | 64617181 | 1.84E-02 | Polysaccharide Lyase | Proteobacter  | Betaproteobacteria  | Burkholderiales  | Comamonadales    | Comamonadales      |
| 185153.4  | Nucleic acid metabolism                             | Pyrimidine metabolism                          | Thymidine reductase                         | 64617181 | 1.84E-02 | Polysaccharide Lyase | Proteobacter  | Betaproteobacteria  | Burkholderiales  | Comamonadales    | Comamonadales      |
| 185153.4  | Nucleic acid metabolism                             | Pyrimidine metabolism                          | Thymidine reductase                         | 64617181 | 1.84E-02 | Polysaccharide Lyase | Proteobacter  | Betaproteobacteria  | Burkholderiales  | Comamonadales    | Comamonadales      |
| 185153.4  | Nucleic acid metabolism                             | Pyrimidine metabolism                          | Thymidine reductase                         | 64617181 | 1.84E-02 | Polysaccharide Lyase | Proteobacter  | Betaproteobacteria  | Burkholderiales  | Comamonadales    | Comamonadales      |
| 185153.4  | Nucleic acid metabolism                             | Pyrimidine metabolism                          | Thymidine reductase                         | 64617181 | 1.84E-02 | Polysaccharide Lyase | Proteobacter  | Betaproteobacteria  | Burkholderiales  | Comamonadales    | Comamonadales      |
| 185153.4  | Nucleic acid metabolism                             | Pyrimidine metabolism                          | Thymidine reductase                         | 64617181 | 1.84E-02 | Polysaccharide Lyase | Proteobacter  | Betaproteobacteria  | Burkholderiales  | Comamonadales    | Comamonadales      |
| 185153.4  | Nucleic acid metabolism                             | Pyrimidine metabolism                          | Thymidine reductase                         | 64617181 | 1.84E-02 | Polysaccharide Lyase | Proteobacter  | Betaproteobacteria  | Burkholderiales  | Comamonadales    | Comamonadales      |
| 185153.4  | Nucleic acid metabolism                             | Pyrimidine metabolism                          | Thymidine reductase                         | 64617181 | 1.84E-02 | Polysaccharide Lyase | Proteobacter  | Betaproteobacteria  | Burkholderiales  | Comamonadales    | Comamonadales      |
| 185153.4  | Nucleic acid metabolism                             | Pyrimidine metabolism                          | Thymidine reductase                         | 64617181 | 1.84E-02 | Polysaccharide Lyase | Proteobacter  | Betaproteobacteria  | Burkholderiales  | Comamonadales    | Comamonadales      |
| 185153.4  | Nucleic acid metabolism                             | Pyrimidine metabolism                          | Thymidine reductase                         | 64617181 | 1.84E-02 | Polysaccharide Lyase | Proteobacter  | Betaproteobacteria  | Burkholderiales  | Comamonadales    | Comamonadales      |
| 185153.4  | Nucleic acid metabolism                             | Pyrimidine metabolism                          | Thymidine reductase                         | 64617181 | 1.84E-02 | Polysaccharide Lyase | Proteobacter  | Betaproteobacteria  | Burkholderiales  | Comamonadales    | Comamonadales      |
| 185153.4  | Nucleic acid metabolism                             | Pyrimidine metabolism                          | Thymidine reductase                         | 64617181 | 1.84E-02 | Polysaccharide Lyase | Proteobacter  | Betaproteobacteria  | Burkholderiales  | Comamonadales    | Comamonadales      |
| 185153.4  | Nucleic acid metabolism                             | Pyrimidine metabolism                          | Thymidine reductase                         | 64617181 | 1.84E-02 | Polysaccharide Lyase | Proteobacter  | Betaproteobacteria  | Burkholderiales  | Comamonadales    | Comamonadales      |
| 185153.4  | Nucleic acid metabolism                             | Pyrimidine metabolism                          | Thymidine reductase                         | 64617181 | 1.84E-02 | Polysaccharide Lyase | Proteobacter  | Betaproteobacteria  | Burkholderiales  | Comamonadales    | Comamonadales      |
| 185153.4  | Nucleic acid metabolism                             | Pyrimidine metabolism                          | Thymidine reductase                         | 64617181 | 1.84E-02 | Polysaccharide Lyase | Proteobacter  | Betaproteobacteria  | Burkholderiales  | Comamonadales    | Comamonadales      |
| 185153.4  | Nucleic acid metabolism                             | Pyrimidine metabolism                          | Thymidine reductase                         | 64617181 | 1.84E-02 | Polysaccharide Lyase | Proteobacter  | Betaproteobacteria  | Burkholderiales  | Comamonadales    | Comamonadales      |
| 185153.4  | Nucleic acid metabolism                             | Pyrimidine metabolism                          | Thymidine reductase                         | 64617181 | 1.84E-02 | Polysaccharide Lyase | Proteobacter  | Betaproteobacteria  | Burkholderiales  | Comamonadales    | Comamonadales      |
| 185153.4  | Nucleic acid metabolism                             | Pyrimidine metabolism                          | Thymidine reductase                         | 64617181 | 1.84E-02 | Polysaccharide Lyase | Proteobacter  | Betaproteobacteria  | Burkholderiales  | Comamonadales    | Comamonadales      |
| 185153.4  | Nucleic acid metabolism                             | Pyrimidine metabolism                          | Thymidine reductase                         | 64617181 | 1.84E-02 | Polysaccharide Lyase | Proteobacter  | Betaproteobacteria  | Burkholderiales  | Comamonadales    | Comamonadales      |
| 185153.4  | Nucleic acid metabolism                             | Pyrimidine metabolism                          | Thymidine reductase                         | 64617181 | 1.84E-02 | Polysaccharide Lyase | Proteobacter  | Betaproteobacteria  | Burkholderiales  | Comamonadales    | Comamonadales      |
| 185153.4  | Nucleic acid metabolism                             | Pyrimidine metabolism                          | Thymidine reductase                         | 64617181 | 1.84E-02 | Polysaccharide Lyase | Proteobacter  | Betaproteobacteria  | Burkholderiales  | Comamonadales    | Comamonadales      |
| 185153.4  | Nucleic acid metabolism                             | Pyrimidine metabolism                          | Thymidine reductase                         | 64617181 | 1.84E-02 | Polysaccharide Lyase | Proteobacter  | Betaproteobacteria  | Burkholderiales  | Comamonadales    | Comamonadales      |
| 185153.4  | Nucleic acid metabolism                             | Pyrimidine metabolism                          | Thymidine reductase                         | 64617181 | 1.84E-02 | Polysaccharide Lyase | Proteobacter  | Betaproteobacteria  | Burkholderiales  | Comamonadales    | Comamonadales      |
| 185153.4  | Nucleic acid metabolism                             | Pyrimidine metabolism                          | Thymidine reductase                         | 64617181 | 1.84E-02 | Polysaccharide Lyase | Proteobacter  | Betaproteobacteria  | Burkholderiales  | Comamonadales    | Comamonadales      |
| 185153.4  | Nucleic acid metabolism                             | Pyrimidine metabolism                          | Thymidine reductase                         | 64617181 | 1.84E-02 | Polysaccharide Lyase | Proteobacter  | Betaproteobacteria  | Burkholderiales  | Comamonadales    | Comamonadales      |
| 185153.4  | Nucleic acid metabolism                             | Pyrimidine metabolism                          | Thymidine reductase                         | 64617181 | 1.84E-02 | Polysaccharide Lyase | Proteobacter  | Betaproteobacteria  | Burkholderiales  | Comamonadales    | Comamonadales      |
| 185153.4  | Nucleic acid metabolism                             | Pyrimidine metabolism                          | Thymidine reductase                         | 64617181 | 1.84E-02 | Polysaccharide Lyase | Proteobacter  | Betaproteobacteria  | Burkholderiales  | Comamonadales    | Comamonadales      |
| 185153.4  | Nucleic acid metabolism                             |                                                |                                             |          |          |                      |               |                     |                  |                  |                    |





|             |                                                     |                                        |             |                                                     |                                        |
|-------------|-----------------------------------------------------|----------------------------------------|-------------|-----------------------------------------------------|----------------------------------------|
| 122879.2    | No roles mapped out of 4 KOs                        |                                        | 122879.2    | No roles mapped out of 4 KOs                        | Unconjugated protein                   |
| 128263.2    | No roles mapped out of 4 KOs                        |                                        | 128263.2    | No roles mapped out of 4 KOs                        | Unconjugated protein                   |
| 64021.6     | Transport and binding proteins                      | Unconjugated substrate                 | 64021.6     | Transport and binding proteins                      | Unconjugated substrate                 |
| 1012775.3   | No roles mapped out of 4 KOs                        |                                        | 1012775.3   | No roles mapped out of 4 KOs                        | Unconjugated protein                   |
| 124657.3    | No roles mapped out of 4 KOs                        |                                        | 124657.3    | No roles mapped out of 4 KOs                        | Unconjugated protein                   |
| 90306.4     | Transport and binding proteins                      |                                        | 90306.4     | Transport and binding proteins                      |                                        |
| 1151776.1   | No roles mapped out of 4 KOs                        |                                        | 1151776.1   | No roles mapped out of 4 KOs                        | Unconjugated protein                   |
| 85233.2     | No roles mapped out of 4 KOs                        |                                        | 85233.2     | No roles mapped out of 4 KOs                        | Unconjugated protein                   |
| 96483.1     | Catabolic reactions                                 |                                        | 96483.1     | Catabolic reactions                                 |                                        |
| 76247.7     | Intracellular trafficking, assembly, and processing |                                        | 76247.7     | Intracellular trafficking, assembly, and processing |                                        |
| 782342.1    | No roles mapped out of 4 KOs                        |                                        | 782342.1    | No roles mapped out of 4 KOs                        | Unconjugated protein                   |
| 120280.3    | No roles mapped out of 4 KOs                        |                                        | 120280.3    | No roles mapped out of 4 KOs                        | Unconjugated protein                   |
| 102002.2    | Prosthetic groups, cofactors, and carriers          |                                        | 102002.2    | Prosthetic groups, cofactors, and carriers          |                                        |
| 79792.1     | Transcription                                       |                                        | 79792.1     | Transcription                                       |                                        |
| 12672.2     | No roles mapped out of 4 KOs                        |                                        | 12672.2     | No roles mapped out of 4 KOs                        | Unconjugated protein                   |
| 134046.3    | No roles mapped out of 4 KOs                        |                                        | 134046.3    | No roles mapped out of 4 KOs                        | Unconjugated protein                   |
| 31185.5     | No roles mapped out of 4 KOs                        |                                        | 31185.5     | No roles mapped out of 4 KOs                        | Unconjugated protein                   |
| 154489.1    | Nucleic acid metabolism                             |                                        | 154489.1    | Nucleic acid metabolism                             |                                        |
| 36417.3     | Catabolic reactions                                 |                                        | 36417.3     | Catabolic reactions                                 |                                        |
| 156787.1    | Cell motility and adherence                         |                                        | 156787.1    | Cell motility and adherence                         |                                        |
| 102683.0    | Amnio acid metabolism                               |                                        | 102683.0    | Amnio acid metabolism                               |                                        |
| 17037.1     | Transcription                                       |                                        | 17037.1     | Transcription                                       |                                        |
| 79059.15    | No roles mapped out of 4 KOs                        |                                        | 79059.15    | No roles mapped out of 4 KOs                        | Unconjugated protein                   |
| 82313.2     | Intracellular trafficking, assembly, and processing |                                        | 82313.2     | Intracellular trafficking, assembly, and processing |                                        |
| 79892.2     | No roles mapped out of 4 KOs                        |                                        | 79892.2     | No roles mapped out of 4 KOs                        | Unconjugated protein                   |
| 614862.1    | Nucleic acid metabolism                             |                                        | 614862.1    | Nucleic acid metabolism                             |                                        |
| 116401.5    | Carbohydrate metabolism                             |                                        | 116401.5    | Carbohydrate metabolism                             |                                        |
| 705.1       | No roles mapped out of 4 KOs                        |                                        | 705.1       | No roles mapped out of 4 KOs                        | Unconjugated protein                   |
| 290220.3    | No roles mapped out of 4 KOs                        |                                        | 290220.3    | No roles mapped out of 4 KOs                        | Unconjugated protein                   |
| 120175.2    | No roles mapped out of 4 KOs                        |                                        | 120175.2    | No roles mapped out of 4 KOs                        | Unconjugated protein                   |
| 48142.2     | Translation                                         |                                        | 48142.2     | Translation                                         |                                        |
| 53329.2     | Intracellular trafficking, assembly, and processing |                                        | 53329.2     | Intracellular trafficking, assembly, and processing |                                        |
| 170977.2    | No roles mapped out of 4 KOs                        |                                        | 170977.2    | No roles mapped out of 4 KOs                        | Unconjugated protein                   |
| 76027.1     | No roles mapped out of 4 KOs                        |                                        | 76027.1     | No roles mapped out of 4 KOs                        | Unconjugated protein                   |
| 41007.4     | No roles mapped out of 4 KOs                        |                                        | 41007.4     | No roles mapped out of 4 KOs                        | Unconjugated protein                   |
| 1271751.17  | Transport and binding proteins                      | Amnio acids, peptides and amines       | 1271751.17  | Transport and binding proteins                      | Amnio acids, peptides and amines       |
| 157619.16   | No roles mapped out of 4 KOs                        |                                        | 157619.16   | No roles mapped out of 4 KOs                        | Unconjugated protein                   |
| 164346.1    | Translation                                         |                                        | 164346.1    | Translation                                         |                                        |
| 82358.4     | Carbohydrate metabolism                             |                                        | 82358.4     | Carbohydrate metabolism                             |                                        |
| 121719.1    | No roles mapped out of 4 KOs                        |                                        | 121719.1    | No roles mapped out of 4 KOs                        | Unconjugated protein                   |
| 123279.5    | Amnio acid metabolism                               |                                        | 123279.5    | Amnio acid metabolism                               |                                        |
| 162677.1    | Intracellular trafficking, assembly, and processing |                                        | 162677.1    | Intracellular trafficking, assembly, and processing |                                        |
| 15179.9     | Transport and binding proteins                      |                                        | 15179.9     | Transport and binding proteins                      |                                        |
| 824828.3    | Nucleic acid metabolism                             |                                        | 824828.3    | Nucleic acid metabolism                             |                                        |
| 48477.2     | No roles mapped out of 4 KOs                        |                                        | 48477.2     | No roles mapped out of 4 KOs                        | Unconjugated protein                   |
| 1133640.7   | Transport and binding proteins                      | Protein export, secretion, and sorting | 1133640.7   | Transport and binding proteins                      | Protein export, secretion, and sorting |
| 65068.7     | Fatty acid and lipid metabolism                     |                                        | 65068.7     | Fatty acid and lipid metabolism                     |                                        |
| 36188.4     | No roles mapped out of 4 KOs                        |                                        | 36188.4     | No roles mapped out of 4 KOs                        | Unconjugated protein                   |
| 14132.1     | Translocation                                       |                                        | 14132.1     | Translocation                                       |                                        |
| 159494.5    | No roles mapped out of 4 KOs                        |                                        | 159494.5    | No roles mapped out of 4 KOs                        | Unconjugated protein                   |
| 102678.1    | No roles mapped out of 4 KOs                        |                                        | 102678.1    | No roles mapped out of 4 KOs                        | Unconjugated protein                   |
| 133435.1    | Cell motility and adherence                         |                                        | 133435.1    | Cell motility and adherence                         |                                        |
| 6777.1      | Transcription                                       |                                        | 6777.1      | Transcription                                       |                                        |
| 174747.6    | Carbohydrate metabolism                             |                                        | 174747.6    | Carbohydrate metabolism                             |                                        |
| 64332.2     | Carbohydrate metabolism                             |                                        | 64332.2     | Carbohydrate metabolism                             |                                        |
| 94658.1     | No roles mapped out of 4 KOs                        |                                        | 94658.1     | No roles mapped out of 4 KOs                        | Unconjugated protein                   |
| 182179.1    | Nucleic acid metabolism                             |                                        | 182179.1    | Nucleic acid metabolism                             |                                        |
| 102099.5    | Nucleic acid metabolism                             |                                        | 102099.5    | Nucleic acid metabolism                             |                                        |
| 121796.3    | No roles mapped out of 4 KOs                        |                                        | 121796.3    | No roles mapped out of 4 KOs                        | Unconjugated protein                   |
| 174830.5    | No roles mapped out of 4 KOs                        |                                        | 174830.5    | No roles mapped out of 4 KOs                        | Unconjugated protein                   |
| 11073.2     | Transcription                                       |                                        | 11073.2     | Transcription                                       |                                        |
| 129663.1    | Nucleic acid metabolism                             |                                        | 129663.1    | Nucleic acid metabolism                             |                                        |
| 61431.12    | No roles mapped out of 4 KOs                        |                                        | 61431.12    | No roles mapped out of 4 KOs                        | Unconjugated protein                   |
| 50256.14    | No roles mapped out of 4 KOs                        |                                        | 50256.14    | No roles mapped out of 4 KOs                        | Unconjugated protein                   |
| 81849.6     | No roles mapped out of 4 KOs                        |                                        | 81849.6     | No roles mapped out of 4 KOs                        | Unconjugated protein                   |
| 11100.1     | Transcription                                       |                                        | 11100.1     | Transcription                                       |                                        |
| 113172.4    | Energy metabolism                                   |                                        | 113172.4    | Energy metabolism                                   |                                        |
| 1026176.8   | Energy metabolism                                   |                                        | 1026176.8   | Energy metabolism                                   |                                        |
| 1005414.13  | Nucleic acid metabolism                             |                                        | 1005414.13  | Nucleic acid metabolism                             |                                        |
| 41026.1     | Nucleic acid metabolism                             |                                        | 41026.1     | Nucleic acid metabolism                             |                                        |
| 103133.1    | Transport and binding proteins                      |                                        | 103133.1    | Transport and binding proteins                      |                                        |
| 60270.1     | Oxygen biochemistry                                 |                                        | 60270.1     | Oxygen biochemistry                                 |                                        |
| 150011.5    | Nucleic acid metabolism                             |                                        | 150011.5    | Nucleic acid metabolism                             |                                        |
| 174631.4    | No roles mapped out of 4 KOs                        |                                        | 174631.4    | No roles mapped out of 4 KOs                        | Unconjugated protein                   |
| 174052.7    | No roles mapped out of 4 KOs                        |                                        | 174052.7    | No roles mapped out of 4 KOs                        | Unconjugated protein                   |
| 79531.3     | Defense and invasion systems                        |                                        | 79531.3     | Defense and invasion systems                        |                                        |
| 69987.2     | Translocation                                       |                                        | 69987.2     | Translocation                                       |                                        |
| 129342.6    | Amnio acid metabolism                               |                                        | 129342.6    | Amnio acid metabolism                               |                                        |
| 146140.5    | No roles mapped out of 4 KOs                        |                                        | 146140.5    | No roles mapped out of 4 KOs                        | Unconjugated protein                   |
| 102102.1    | No roles mapped out of 4 KOs                        |                                        | 102102.1    | No roles mapped out of 4 KOs                        | Unconjugated protein                   |
| 1102432.1   | No roles mapped out of 4 KOs                        |                                        | 1102432.1   | No roles mapped out of 4 KOs                        | Unconjugated protein                   |
| 95261.1     | Amnio acid metabolism                               |                                        | 95261.1     | Amnio acid metabolism                               |                                        |
| 72039.1     | Transport and binding proteins                      |                                        | 72039.1     | Transport and binding proteins                      |                                        |
| 7107.6      | Energy metabolism                                   |                                        | 7107.6      | Energy metabolism                                   |                                        |
| 60300.1     | Transport and binding proteins                      |                                        | 60300.1     | Transport and binding proteins                      |                                        |
| 26191.1     | No roles mapped out of 4 KOs                        |                                        | 26191.1     | No roles mapped out of 4 KOs                        | Unconjugated protein                   |
| 118340.1    | No roles mapped out of 4 KOs                        |                                        | 118340.1    | No roles mapped out of 4 KOs                        | Unconjugated protein                   |
| 513458.4    | No roles mapped out of 4 KOs                        |                                        | 513458.4    | No roles mapped out of 4 KOs                        | Unconjugated protein                   |
| 901276.9    | No roles mapped out of 4 KOs                        |                                        | 901276.9    | No roles mapped out of 4 KOs                        | Unconjugated protein                   |
| 118340.1    | No roles mapped out of 4 KOs                        |                                        | 118340.1    | No roles mapped out of 4 KOs                        | Unconjugated protein                   |
| 184514.4    | Energy metabolism                                   |                                        | 184514.4    | Energy metabolism                                   |                                        |
| 116198.5    | Transport and binding proteins                      |                                        | 116198.5    | Transport and binding proteins                      |                                        |
| 924346.1    | Regulatory factors                                  |                                        | 924346.1    | Regulatory factors                                  |                                        |
| 33427.1     | Amnio acid metabolism                               |                                        | 33427.1     | Amnio acid metabolism                               |                                        |
| 80463.1     | Carbohydrates, organic alcohols, and acids          |                                        | 80463.1     | Carbohydrates, organic alcohols, and acids          |                                        |
| 149898.5    | No roles mapped out of 4 KOs                        |                                        | 149898.5    | No roles mapped out of 4 KOs                        | Unconjugated protein                   |
| 149599.4    | No roles mapped out of 4 KOs                        |                                        | 149599.4    | No roles mapped out of 4 KOs                        | Unconjugated protein                   |
| 156379.16   | Prosthetic groups, cofactors, and carriers          |                                        | 156379.16   | Prosthetic groups, cofactors, and carriers          |                                        |
| 117662.1    | Nucleic acid metabolism                             |                                        | 117662.1    | Nucleic acid metabolism                             |                                        |
| 262257.5    | No roles mapped out of 4 KOs                        |                                        | 262257.5    | No roles mapped out of 4 KOs                        | Unconjugated protein                   |
| 170492.3    | Energy metabolism                                   |                                        | 170492.3    | Energy metabolism                                   |                                        |
| 26796.1     | No roles mapped out of 4 KOs                        |                                        | 26796.1     | No roles mapped out of 4 KOs                        | Unconjugated protein                   |
| 115414.1    | Carbohydrate metabolism                             |                                        | 115414.1    | Carbohydrate metabolism                             |                                        |
| 113211.5    | Amnio acids, peptides and amines                    |                                        | 113211.5    | Amnio acids, peptides and amines                    |                                        |
| 951418.1    | No roles mapped out of 4 KOs                        |                                        | 951418.1    | No roles mapped out of 4 KOs                        | Unconjugated protein                   |
| 1129121.5   | Transport and binding proteins                      |                                        | 1129121.5   | Transport and binding proteins                      |                                        |
| 40078.4     | Intracellular trafficking, assembly, and processing |                                        | 40078.4     | Intracellular trafficking, assembly, and processing |                                        |
| 182729.7    | No roles mapped out of 4 KOs                        |                                        | 182729.7    | No roles mapped out of 4 KOs                        | Unconjugated protein                   |
| 184448.7    | No roles mapped out of 4 KOs                        |                                        | 184448.7    | No roles mapped out of 4 KOs                        | Unconjugated protein                   |
| 164385.6    | No roles mapped out of 4 KOs                        |                                        | 164385.6    | No roles mapped out of 4 KOs                        | Unconjugated protein                   |
| 1194862.127 | Prosthetic groups, cofactors, and carriers          |                                        | 1194862.127 | Prosthetic groups, cofactors, and carriers          |                                        |
| 156436.4    | Translation                                         |                                        | 156436.4    | Translation                                         |                                        |
| 102102.1    | Signal transduction                                 |                                        | 102102.1    | Signal transduction                                 |                                        |
| 137292.1    | No roles mapped out of 4 KOs                        |                                        | 137292.1    | No roles mapped out of 4 KOs                        | Unconjugated protein                   |
| 170160.2    | Carbohydrate metabolism                             |                                        | 170160.2    | Carbohydrate metabolism                             |                                        |
| 132721.4    | Amnio acid metabolism                               |                                        | 132721.4    | Amnio acid metabolism                               |                                        |
| 180577.1    | No roles mapped out of 4 KOs                        |                                        | 180577.1    | No roles mapped out of 4 KOs                        | Unconjugated protein                   |
| 115384.12   | Intracellular trafficking, assembly, and processing |                                        | 115384.12   | Intracellular trafficking, assembly, and processing |                                        |
| 114630.6    | Defense and invasion systems                        |                                        | 114630.6    | Defense and invasion systems                        |                                        |
| 102002.2    | Prosthetic groups, cofactors, and carriers          |                                        | 102002.2    | Prosthetic groups, cofactors, and carriers          |                                        |
| 89219.4     | Regulatory factors                                  |                                        | 89219.4     | Regulatory factors                                  |                                        |
| 114791.3    | No roles mapped out of 4 KOs                        |                                        | 114791.3    | No roles mapped out of 4 KOs                        | Unconjugated protein                   |
| 805147.4    | Nucleic acid metabolism                             |                                        | 805147.4    | Nucleic acid metabolism                             |                                        |
| 89021.1     | No roles mapped out of 4 KOs                        |                                        | 89021.1     | No roles mapped out of 4 KOs                        | Unconjugated protein                   |
| 116700.2    | Signal transduction                                 |                                        | 116700.2    | Signal transduction                                 |                                        |
| 758144.4    | Defense and invasion systems                        |                                        | 758144.4    | Defense and invasion systems                        |                                        |
| 1542179.5   | Transcription                                       |                                        | 1542179.5   | Transcription                                       |                                        |
| 1156363.4   | No roles mapped out of 4 KOs                        |                                        | 1156363.4   | No roles mapped out of 4 KOs                        | Unconjugated protein                   |
| 1203536.1   | Carbohydrate metabolism                             |                                        | 1203536.1   | Carbohydrate metabolism                             |                                        |
| 171929.2    | Translocation                                       |                                        | 171929.2    | Translocation                                       |                                        |
| 644.2       | Transcription                                       |                                        | 644.2       | Transcription                                       |                                        |
| 102002.2    | Prosthetic groups, cofactors, and carriers          |                                        | 102002.2    | Prosthetic groups, cofactors, and carriers          |                                        |
| 154773.3    | No roles mapped out of 4 KOs                        |                                        | 154773.3    | No roles mapped out of 4 KOs                        | Unconjugated protein                   |
| 104288.2    | Transport and binding proteins                      |                                        | 104288.2    | Transport and binding proteins                      |                                        |
| 82091.4     | Carbohydrate metabolism                             |                                        | 82091.4     | Carbohydrate metabolism                             |                                        |
| 140237.4    | No roles mapped out of 4 KOs                        |                                        | 140237.4    | No roles mapped out of 4 KOs                        | Unconjugated protein                   |
| 6638.1      | No roles mapped out of 4 KOs                        |                                        | 6638.1      | No roles mapped out of 4 KOs                        | Unconjugated protein                   |
| 60683.1     | Amnio acid metabolism                               |                                        | 60683.1     | Amnio acid metabolism                               |                                        |
| 100294.4    | Transport and binding proteins                      |                                        | 100294.4    | Transport and binding proteins                      |                                        |
| 88960.7     | Energy metabolism                                   |                                        | 88960.7     | Energy metabolism                                   |                                        |
| 102549.4    | Signal transduction                                 |                                        | 102549.4    | Signal transduction                                 |                                        |
| 6619.2      | Energy metabolism                                   |                                        | 6619.2      | Energy metabolism                                   |                                        |
| 120175.2    | Unconjugated protein                                |                                        | 120175.2    | Unconjugated protein                                |                                        |
| 68728.5     | Cell motility and adherence                         |                                        | 68728.5     | Cell motility and adherence                         |                                        |
| 154712.1    | Transport and binding proteins                      |                                        | 154712.1    | Transport and binding proteins                      |                                        |
| 137321.4    | Transport and binding proteins                      |                                        | 137321.4    | Transport and binding proteins                      |                                        |
| 1416236.3   | Carbohydrate metabolism                             |                                        | 1416236.3   | Carbohydrate metabolism                             |                                        |
| 15231.5     | Transcription                                       |                                        | 15231.5     | Transcription                                       |                                        |
| 118627.2    | Amnio acid metabolism                               |                                        | 118627.2    | Amnio acid metabolism                               |                                        |
| 75896.2     | Signal transduction                                 |                                        | 75896.2     | Signal transduction                                 |                                        |
| 1178121.2   | Transcription                                       |                                        | 1178121.2   | Transcription                                       |                                        |
| 65130.1     | No roles mapped out of 4 KOs                        |                                        | 65130.1     | No roles mapped out of 4 KOs                        | Unconjugated protein                   |
| 2362.9      | Nucleic acid metabolism                             |                                        | 2362.9      | Nucleic acid metabolism                             |                                        |
| 39113.4     | Carbohydrate metabolism                             |                                        | 39113.4     | Carbohydrate metabolism                             |                                        |
| 110900.1    | Cell motility and adherence                         |                                        | 110900.1    | Cell motility and adherence                         |                                        |
| 86391.3     | Transport and binding proteins                      |                                        | 86391.3     | Transport and binding proteins                      |                                        |
| 140237.4    | No roles mapped out of 4 KOs                        |                                        | 140237.4    | No roles mapped out of 4 KOs                        | Unconjugated protein                   |
| 56037.1     | Translation                                         |                                        | 56037.1     | Translation                                         |                                        |
| 18889.3     | Transport and binding proteins                      |                                        | 18889.3     | Transport and binding proteins                      |                                        |
| 102027.2    | Transport and binding proteins                      |                                        | 102027.2    | Transport and binding proteins                      |                                        |
| 117023.2    | Transport and binding proteins                      |                                        | 117023.2    | Transport and binding proteins                      |                                        |
| 25022.4     | No roles mapped out of 4 KOs                        |                                        | 25022.4     | No roles mapped out of 4 KOs                        | Unconjugated protein                   |
| 1164173.3   | No roles mapped out of 4 KOs                        |                                        | 1164173.3   | No roles mapped out of 4 KOs                        | Unconjugated protein                   |
| 101930.2    | Signal transduction                                 |                                        | 101930.2    | Signal transduction                                 |                                        |
| 88378.9     | No roles mapped out of 4 KOs                        |                                        | 88378.9     | No roles mapped out of 4 KOs                        | Unconjugated protein                   |
| 20633.4     | Carbohydrate metabolism                             |                                        | 20633.4     | Carbohydrate metabolism                             |                                        |
| 139352.5    | Nucleic acid metabolism                             |                                        | 139352.5    | Nucleic acid metabolism                             |                                        |
| 162150.15   | Nucleic acid metabolism                             |                                        | 162150.15   | Nucleic acid metabolism                             |                                        |
| 148447.1    | No roles mapped out of 4 KOs                        |                                        | 148447.1    | No roles mapped out of 4 KOs                        | Unconjugated protein                   |
| 63407.1     | Transport and binding proteins                      |                                        | 63407.1     | Transport and binding proteins                      |                                        |
| 82091.4     | Carbohydrate metabolism                             |                                        | 82091.4     | Carbohydrate metabolism                             |                                        |
| 54307.0     | Carbohydrate metabolism                             |                                        | 54307.0     | Carbohydrate metabolism                             |                                        |
| 31887.4     | Signal transduction                                 |                                        | 31887.4     | Signal transduction                                 |                                        |
| 69480.20    | Amnio acid metabolism                               |                                        | 69480.20    | Amnio acid metabolism                               |                                        |
| 102102.1    | Translocation                                       |                                        | 102102.1    | Translocation                                       |                                        |
| 21327.5     | No roles mapped out of 4 KOs                        |                                        | 21327.5     | No roles mapped out of 4 KOs                        | Unconjugated protein                   |
| 83000.9     | No roles mapped out of 4 KOs                        |                                        | 83000.9     | No roles mapped out of 4 KOs                        | Unconjugated protein                   |
| 86043.4     | Transport and binding proteins                      |                                        | 86043.4     | Transport and binding proteins                      |                                        |
| 2952.4      | Transport and binding proteins                      |                                        | 2952.4      | Transport and binding proteins                      |                                        |
| 144902.9    | Transport and binding proteins                      |                                        | 144902.9    | Transport and binding proteins                      |                                        |
| 101930.2    | Signal transduction                                 |                                        | 101930.2    | Signal transduction                                 |                                        |
| 141892.1    | No roles mapped out of 4 KOs                        |                                        | 141892.1    | No roles mapped out of 4 KOs                        | Unconjugated protein                   |
| 151691.3    | Nucleic acid metabolism                             |                                        | 151691.3    | Nucleic acid metabolism                             |                                        |
| 3262.9      | Nucleic acid metabolism                             |                                        | 3262.9      | Nucleic acid metabolism                             |                                        |
| 140383.7    | Energy metabolism                                   |                                        | 140383.7    | Energy metabolism                                   |                                        |
| 117023.2    | Transport and binding proteins                      |                                        | 117023.2    | Transport and binding proteins                      |                                        |
| 348249.15   | No roles mapped out of 4 KOs                        |                                        | 348249.15   | No roles mapped out of 4 KOs                        | Unconjugated protein                   |
| 116330.36   | No roles mapped out of 4 KOs                        |                                        | 116330.36   | No roles mapped out of 4 KOs                        | Unconjugated protein                   |
| 34720836.6  | Unconjugated protein                                |                                        | 34720836.6  | Unconjugated protein                                |                                        |
| 34720837.1  | Unconjugated protein                                |                                        | 34720837.1  | Unconjugated protein                                |                                        |
| 34720838.2  | Unconjugated protein                                |                                        | 34720838.2  | Unconjugated protein                                |                                        |
| 34720839.3  | Unconjugated protein                                |                                        | 34720839.3  | Unconjugated protein                                |                                        |
| 34720840.4  | Unconjugated protein                                |                                        | 34720840.4  | Unconjugated protein                                |                                        |
| 34720841.5  | Unconjugated protein                                |                                        | 34720841.5  | Unconjugated protein                                |                                        |
| 34720842.6  | Unconjugated protein                                |                                        | 34720842.6  | Unconjugated protein                                |                                        |
| 34720843.7  | Unconjugated protein                                |                                        | 34720843.7  | Unconjugated protein                                |                                        |
| 34720844.8  | Unconjugated protein                                |                                        | 34720844.8  | Unconjugated protein                                |                                        |
| 34720845.9  | Unconjugated protein                                |                                        | 34720845.9  | Unconjugated protein                                |                                        |
| 34720846.0  | Unconjugated protein                                |                                        | 34720846.0  | Unconjugated protein                                |                                        |
| 34720847.1  | Unconjugated protein                                |                                        | 34720847.1  | Unconjugated protein                                |                                        |
| 34720848.2  | Unconjugated protein                                |                                        | 34720848.2  | Unconjugated protein                                |                                        |
| 34720849.3  | Unconjugated protein                                |                                        | 34720849.3  | Unconjugated protein                                |                                        |
| 34720850.4  | Unconjugated protein                                |                                        | 34720850.4  | Unconjugated protein                                |                                        |



|           |                                                     |                                                                           |                                                                                                                                                                                                                                                                                                                                                                                                                                                                                                                                                                                                                                                                                                                                                                                                                                                                                                                                                                                                                                                                                                                                                                                                                                                                                                                                                                                                                                                                                                                                                                                                                                                                                                                                                                                                                                                                                                                                                                                                                                                                                                                                                                                                                                                                                                                                                                                                                                                                                                                                                                                                                                                                                                                                                                                                                                                                                                                                                                                                                                                                                                                                                                                                                                                                                                                                                                                                                                                                                                                                                                                                                                                                                                                                                                                                                                                                                                                                                                                                                                                                                                                                                                                                                                                                                                                                                                                                                                                                                                                                                                                                                                                                                                                                                                                                                                                                                                                                                                                                                                                                                                                                                                                                                                                                                                                                                                                                                                                                                                                                                                                                                                                                                                                                                                                                                                                                                                                                                                                                                                                                                                                                                                                                                                                                                                                                                                                                                                                                                                                                                                                                                                                                                                                                                                                                                                                                                                                                                                                                                                                                                                                                                                                                                                                                                                                                                                                                                                                                                                                                                                                                                                                                                                                                                                                                                                                                                                                                                                                                                                                                                                               |          |                |                                |                                                   |              |
|-----------|-----------------------------------------------------|---------------------------------------------------------------------------|---------------------------------------------------------------------------------------------------------------------------------------------------------------------------------------------------------------------------------------------------------------------------------------------------------------------------------------------------------------------------------------------------------------------------------------------------------------------------------------------------------------------------------------------------------------------------------------------------------------------------------------------------------------------------------------------------------------------------------------------------------------------------------------------------------------------------------------------------------------------------------------------------------------------------------------------------------------------------------------------------------------------------------------------------------------------------------------------------------------------------------------------------------------------------------------------------------------------------------------------------------------------------------------------------------------------------------------------------------------------------------------------------------------------------------------------------------------------------------------------------------------------------------------------------------------------------------------------------------------------------------------------------------------------------------------------------------------------------------------------------------------------------------------------------------------------------------------------------------------------------------------------------------------------------------------------------------------------------------------------------------------------------------------------------------------------------------------------------------------------------------------------------------------------------------------------------------------------------------------------------------------------------------------------------------------------------------------------------------------------------------------------------------------------------------------------------------------------------------------------------------------------------------------------------------------------------------------------------------------------------------------------------------------------------------------------------------------------------------------------------------------------------------------------------------------------------------------------------------------------------------------------------------------------------------------------------------------------------------------------------------------------------------------------------------------------------------------------------------------------------------------------------------------------------------------------------------------------------------------------------------------------------------------------------------------------------------------------------------------------------------------------------------------------------------------------------------------------------------------------------------------------------------------------------------------------------------------------------------------------------------------------------------------------------------------------------------------------------------------------------------------------------------------------------------------------------------------------------------------------------------------------------------------------------------------------------------------------------------------------------------------------------------------------------------------------------------------------------------------------------------------------------------------------------------------------------------------------------------------------------------------------------------------------------------------------------------------------------------------------------------------------------------------------------------------------------------------------------------------------------------------------------------------------------------------------------------------------------------------------------------------------------------------------------------------------------------------------------------------------------------------------------------------------------------------------------------------------------------------------------------------------------------------------------------------------------------------------------------------------------------------------------------------------------------------------------------------------------------------------------------------------------------------------------------------------------------------------------------------------------------------------------------------------------------------------------------------------------------------------------------------------------------------------------------------------------------------------------------------------------------------------------------------------------------------------------------------------------------------------------------------------------------------------------------------------------------------------------------------------------------------------------------------------------------------------------------------------------------------------------------------------------------------------------------------------------------------------------------------------------------------------------------------------------------------------------------------------------------------------------------------------------------------------------------------------------------------------------------------------------------------------------------------------------------------------------------------------------------------------------------------------------------------------------------------------------------------------------------------------------------------------------------------------------------------------------------------------------------------------------------------------------------------------------------------------------------------------------------------------------------------------------------------------------------------------------------------------------------------------------------------------------------------------------------------------------------------------------------------------------------------------------------------------------------------------------------------------------------------------------------------------------------------------------------------------------------------------------------------------------------------------------------------------------------------------------------------------------------------------------------------------------------------------------------------------------------------------------------------------------------------------------------------------------------------------------------------------------------------------------------------------------------------------------------------------------------------------------------------------------------------------------------------------------------------------------------------------------------------------------------------------------------------------------------------------------------------------------------------------------------------------------------------------------------------------------------------------------------------|----------|----------------|--------------------------------|---------------------------------------------------|--------------|
| 759370_2  | Signal transduction                                 | Taxis                                                                     | Chemotaxis                                                                                                                                                                                                                                                                                                                                                                                                                                                                                                                                                                                                                                                                                                                                                                                                                                                                                                                                                                                                                                                                                                                                                                                                                                                                                                                                                                                                                                                                                                                                                                                                                                                                                                                                                                                                                                                                                                                                                                                                                                                                                                                                                                                                                                                                                                                                                                                                                                                                                                                                                                                                                                                                                                                                                                                                                                                                                                                                                                                                                                                                                                                                                                                                                                                                                                                                                                                                                                                                                                                                                                                                                                                                                                                                                                                                                                                                                                                                                                                                                                                                                                                                                                                                                                                                                                                                                                                                                                                                                                                                                                                                                                                                                                                                                                                                                                                                                                                                                                                                                                                                                                                                                                                                                                                                                                                                                                                                                                                                                                                                                                                                                                                                                                                                                                                                                                                                                                                                                                                                                                                                                                                                                                                                                                                                                                                                                                                                                                                                                                                                                                                                                                                                                                                                                                                                                                                                                                                                                                                                                                                                                                                                                                                                                                                                                                                                                                                                                                                                                                                                                                                                                                                                                                                                                                                                                                                                                                                                                                                                                                                                                                    | 20699991 | 0.006537       | Polysaccharide                 | Proteobacterium: Gammaproteobacteria: Pseudomonas | Pseudomonas  |
| 759370_1  | Tropism and chemotaxis metabolism                   | General degradation                                                       | Chemical synthesis                                                                                                                                                                                                                                                                                                                                                                                                                                                                                                                                                                                                                                                                                                                                                                                                                                                                                                                                                                                                                                                                                                                                                                                                                                                                                                                                                                                                                                                                                                                                                                                                                                                                                                                                                                                                                                                                                                                                                                                                                                                                                                                                                                                                                                                                                                                                                                                                                                                                                                                                                                                                                                                                                                                                                                                                                                                                                                                                                                                                                                                                                                                                                                                                                                                                                                                                                                                                                                                                                                                                                                                                                                                                                                                                                                                                                                                                                                                                                                                                                                                                                                                                                                                                                                                                                                                                                                                                                                                                                                                                                                                                                                                                                                                                                                                                                                                                                                                                                                                                                                                                                                                                                                                                                                                                                                                                                                                                                                                                                                                                                                                                                                                                                                                                                                                                                                                                                                                                                                                                                                                                                                                                                                                                                                                                                                                                                                                                                                                                                                                                                                                                                                                                                                                                                                                                                                                                                                                                                                                                                                                                                                                                                                                                                                                                                                                                                                                                                                                                                                                                                                                                                                                                                                                                                                                                                                                                                                                                                                                                                                                                                            | 21059154 | 0.001088       | Polysaccharide                 | Proteobacterium: Gammaproteobacteria: Pseudomonas | Pseudomonas  |
| 103167_12 | Transport and binding proteins                      | Amino acids, peptides and amines                                          | Periplasmic chaperone and Csa synthase                                                                                                                                                                                                                                                                                                                                                                                                                                                                                                                                                                                                                                                                                                                                                                                                                                                                                                                                                                                                                                                                                                                                                                                                                                                                                                                                                                                                                                                                                                                                                                                                                                                                                                                                                                                                                                                                                                                                                                                                                                                                                                                                                                                                                                                                                                                                                                                                                                                                                                                                                                                                                                                                                                                                                                                                                                                                                                                                                                                                                                                                                                                                                                                                                                                                                                                                                                                                                                                                                                                                                                                                                                                                                                                                                                                                                                                                                                                                                                                                                                                                                                                                                                                                                                                                                                                                                                                                                                                                                                                                                                                                                                                                                                                                                                                                                                                                                                                                                                                                                                                                                                                                                                                                                                                                                                                                                                                                                                                                                                                                                                                                                                                                                                                                                                                                                                                                                                                                                                                                                                                                                                                                                                                                                                                                                                                                                                                                                                                                                                                                                                                                                                                                                                                                                                                                                                                                                                                                                                                                                                                                                                                                                                                                                                                                                                                                                                                                                                                                                                                                                                                                                                                                                                                                                                                                                                                                                                                                                                                                                                                                        | 21051787 | 0.023607       | Polysaccharide                 | taxonomic annotation available                    |              |
| 23835_3   | Nucleic acid metabolism                             | RNA and DNA repair                                                        | RecA and RecBCDE                                                                                                                                                                                                                                                                                                                                                                                                                                                                                                                                                                                                                                                                                                                                                                                                                                                                                                                                                                                                                                                                                                                                                                                                                                                                                                                                                                                                                                                                                                                                                                                                                                                                                                                                                                                                                                                                                                                                                                                                                                                                                                                                                                                                                                                                                                                                                                                                                                                                                                                                                                                                                                                                                                                                                                                                                                                                                                                                                                                                                                                                                                                                                                                                                                                                                                                                                                                                                                                                                                                                                                                                                                                                                                                                                                                                                                                                                                                                                                                                                                                                                                                                                                                                                                                                                                                                                                                                                                                                                                                                                                                                                                                                                                                                                                                                                                                                                                                                                                                                                                                                                                                                                                                                                                                                                                                                                                                                                                                                                                                                                                                                                                                                                                                                                                                                                                                                                                                                                                                                                                                                                                                                                                                                                                                                                                                                                                                                                                                                                                                                                                                                                                                                                                                                                                                                                                                                                                                                                                                                                                                                                                                                                                                                                                                                                                                                                                                                                                                                                                                                                                                                                                                                                                                                                                                                                                                                                                                                                                                                                                                                                              | 21051788 | 0.007386       | Polysaccharide                 | taxonomic annotation available                    |              |
| 28330_2   | Transport and binding proteins                      | Amino acids, peptides and amines                                          | Metabolic protein tyrosinase                                                                                                                                                                                                                                                                                                                                                                                                                                                                                                                                                                                                                                                                                                                                                                                                                                                                                                                                                                                                                                                                                                                                                                                                                                                                                                                                                                                                                                                                                                                                                                                                                                                                                                                                                                                                                                                                                                                                                                                                                                                                                                                                                                                                                                                                                                                                                                                                                                                                                                                                                                                                                                                                                                                                                                                                                                                                                                                                                                                                                                                                                                                                                                                                                                                                                                                                                                                                                                                                                                                                                                                                                                                                                                                                                                                                                                                                                                                                                                                                                                                                                                                                                                                                                                                                                                                                                                                                                                                                                                                                                                                                                                                                                                                                                                                                                                                                                                                                                                                                                                                                                                                                                                                                                                                                                                                                                                                                                                                                                                                                                                                                                                                                                                                                                                                                                                                                                                                                                                                                                                                                                                                                                                                                                                                                                                                                                                                                                                                                                                                                                                                                                                                                                                                                                                                                                                                                                                                                                                                                                                                                                                                                                                                                                                                                                                                                                                                                                                                                                                                                                                                                                                                                                                                                                                                                                                                                                                                                                                                                                                                                                  | 20482792 | 0.040774       | Polysaccharide                 | Proteobacterium: Gammaproteobacteria: Pseudomonas | Pseudomonas  |
| 298112_4  | No roles mapped out of 4 KOs                        |                                                                           | HTF/R32 domain-containing protein                                                                                                                                                                                                                                                                                                                                                                                                                                                                                                                                                                                                                                                                                                                                                                                                                                                                                                                                                                                                                                                                                                                                                                                                                                                                                                                                                                                                                                                                                                                                                                                                                                                                                                                                                                                                                                                                                                                                                                                                                                                                                                                                                                                                                                                                                                                                                                                                                                                                                                                                                                                                                                                                                                                                                                                                                                                                                                                                                                                                                                                                                                                                                                                                                                                                                                                                                                                                                                                                                                                                                                                                                                                                                                                                                                                                                                                                                                                                                                                                                                                                                                                                                                                                                                                                                                                                                                                                                                                                                                                                                                                                                                                                                                                                                                                                                                                                                                                                                                                                                                                                                                                                                                                                                                                                                                                                                                                                                                                                                                                                                                                                                                                                                                                                                                                                                                                                                                                                                                                                                                                                                                                                                                                                                                                                                                                                                                                                                                                                                                                                                                                                                                                                                                                                                                                                                                                                                                                                                                                                                                                                                                                                                                                                                                                                                                                                                                                                                                                                                                                                                                                                                                                                                                                                                                                                                                                                                                                                                                                                                                                                             | 20474544 | 0.010393       | Polysaccharide                 | Proteobacterium: Gammaproteobacteria: Pseudomonas | Pseudomonas  |
| 118706_4  | Nucleic acid metabolism                             | D replication, recombination, and repair                                  | 21020847                                                                                                                                                                                                                                                                                                                                                                                                                                                                                                                                                                                                                                                                                                                                                                                                                                                                                                                                                                                                                                                                                                                                                                                                                                                                                                                                                                                                                                                                                                                                                                                                                                                                                                                                                                                                                                                                                                                                                                                                                                                                                                                                                                                                                                                                                                                                                                                                                                                                                                                                                                                                                                                                                                                                                                                                                                                                                                                                                                                                                                                                                                                                                                                                                                                                                                                                                                                                                                                                                                                                                                                                                                                                                                                                                                                                                                                                                                                                                                                                                                                                                                                                                                                                                                                                                                                                                                                                                                                                                                                                                                                                                                                                                                                                                                                                                                                                                                                                                                                                                                                                                                                                                                                                                                                                                                                                                                                                                                                                                                                                                                                                                                                                                                                                                                                                                                                                                                                                                                                                                                                                                                                                                                                                                                                                                                                                                                                                                                                                                                                                                                                                                                                                                                                                                                                                                                                                                                                                                                                                                                                                                                                                                                                                                                                                                                                                                                                                                                                                                                                                                                                                                                                                                                                                                                                                                                                                                                                                                                                                                                                                                                      | 0.007781 | Polysaccharide | taxonomic annotation available |                                                   |              |
| 103167_14 | Transport and binding proteins                      | RNA and DNA repair                                                        | UtrA                                                                                                                                                                                                                                                                                                                                                                                                                                                                                                                                                                                                                                                                                                                                                                                                                                                                                                                                                                                                                                                                                                                                                                                                                                                                                                                                                                                                                                                                                                                                                                                                                                                                                                                                                                                                                                                                                                                                                                                                                                                                                                                                                                                                                                                                                                                                                                                                                                                                                                                                                                                                                                                                                                                                                                                                                                                                                                                                                                                                                                                                                                                                                                                                                                                                                                                                                                                                                                                                                                                                                                                                                                                                                                                                                                                                                                                                                                                                                                                                                                                                                                                                                                                                                                                                                                                                                                                                                                                                                                                                                                                                                                                                                                                                                                                                                                                                                                                                                                                                                                                                                                                                                                                                                                                                                                                                                                                                                                                                                                                                                                                                                                                                                                                                                                                                                                                                                                                                                                                                                                                                                                                                                                                                                                                                                                                                                                                                                                                                                                                                                                                                                                                                                                                                                                                                                                                                                                                                                                                                                                                                                                                                                                                                                                                                                                                                                                                                                                                                                                                                                                                                                                                                                                                                                                                                                                                                                                                                                                                                                                                                                                          | 20210392 | 0.001868       | Polysaccharide                 | taxonomic annotation available                    |              |
| 119325_5  | Transport and binding proteins                      | Chaperone and folding catalysis                                           | UgtC                                                                                                                                                                                                                                                                                                                                                                                                                                                                                                                                                                                                                                                                                                                                                                                                                                                                                                                                                                                                                                                                                                                                                                                                                                                                                                                                                                                                                                                                                                                                                                                                                                                                                                                                                                                                                                                                                                                                                                                                                                                                                                                                                                                                                                                                                                                                                                                                                                                                                                                                                                                                                                                                                                                                                                                                                                                                                                                                                                                                                                                                                                                                                                                                                                                                                                                                                                                                                                                                                                                                                                                                                                                                                                                                                                                                                                                                                                                                                                                                                                                                                                                                                                                                                                                                                                                                                                                                                                                                                                                                                                                                                                                                                                                                                                                                                                                                                                                                                                                                                                                                                                                                                                                                                                                                                                                                                                                                                                                                                                                                                                                                                                                                                                                                                                                                                                                                                                                                                                                                                                                                                                                                                                                                                                                                                                                                                                                                                                                                                                                                                                                                                                                                                                                                                                                                                                                                                                                                                                                                                                                                                                                                                                                                                                                                                                                                                                                                                                                                                                                                                                                                                                                                                                                                                                                                                                                                                                                                                                                                                                                                                                          | 19030846 | 0.005774       | Polysaccharide                 | Proteobacterium: Gammaproteobacteria: Pseudomonas | Pseudomonas  |
| 144847_6  | Cell structure, growth, and death                   | Bacterial nucleoid protein H1 alpha subunit                               | Hsp90                                                                                                                                                                                                                                                                                                                                                                                                                                                                                                                                                                                                                                                                                                                                                                                                                                                                                                                                                                                                                                                                                                                                                                                                                                                                                                                                                                                                                                                                                                                                                                                                                                                                                                                                                                                                                                                                                                                                                                                                                                                                                                                                                                                                                                                                                                                                                                                                                                                                                                                                                                                                                                                                                                                                                                                                                                                                                                                                                                                                                                                                                                                                                                                                                                                                                                                                                                                                                                                                                                                                                                                                                                                                                                                                                                                                                                                                                                                                                                                                                                                                                                                                                                                                                                                                                                                                                                                                                                                                                                                                                                                                                                                                                                                                                                                                                                                                                                                                                                                                                                                                                                                                                                                                                                                                                                                                                                                                                                                                                                                                                                                                                                                                                                                                                                                                                                                                                                                                                                                                                                                                                                                                                                                                                                                                                                                                                                                                                                                                                                                                                                                                                                                                                                                                                                                                                                                                                                                                                                                                                                                                                                                                                                                                                                                                                                                                                                                                                                                                                                                                                                                                                                                                                                                                                                                                                                                                                                                                                                                                                                                                                                         | 19811415 | 0.024074       | Polysaccharide                 | Proteobacterium: Gammaproteobacteria: Pseudomonas | Pseudomonas  |
| 144702_5  | No roles mapped out of 4 KOs                        | Highly-affinity branched-chain amino acid transporter ATP-binding protein | High-affinity branched-chain amino acid transporter ATP-binding protein                                                                                                                                                                                                                                                                                                                                                                                                                                                                                                                                                                                                                                                                                                                                                                                                                                                                                                                                                                                                                                                                                                                                                                                                                                                                                                                                                                                                                                                                                                                                                                                                                                                                                                                                                                                                                                                                                                                                                                                                                                                                                                                                                                                                                                                                                                                                                                                                                                                                                                                                                                                                                                                                                                                                                                                                                                                                                                                                                                                                                                                                                                                                                                                                                                                                                                                                                                                                                                                                                                                                                                                                                                                                                                                                                                                                                                                                                                                                                                                                                                                                                                                                                                                                                                                                                                                                                                                                                                                                                                                                                                                                                                                                                                                                                                                                                                                                                                                                                                                                                                                                                                                                                                                                                                                                                                                                                                                                                                                                                                                                                                                                                                                                                                                                                                                                                                                                                                                                                                                                                                                                                                                                                                                                                                                                                                                                                                                                                                                                                                                                                                                                                                                                                                                                                                                                                                                                                                                                                                                                                                                                                                                                                                                                                                                                                                                                                                                                                                                                                                                                                                                                                                                                                                                                                                                                                                                                                                                                                                                                                                       | 19784789 | 0.015778       | Polysaccharide                 | Proteobacterium: Gammaproteobacteria: Pseudomonas | Pseudomonas  |
| 174005_4  | Intracellular trafficking, assembly, and processing | Peptidases                                                                | Proteinase K                                                                                                                                                                                                                                                                                                                                                                                                                                                                                                                                                                                                                                                                                                                                                                                                                                                                                                                                                                                                                                                                                                                                                                                                                                                                                                                                                                                                                                                                                                                                                                                                                                                                                                                                                                                                                                                                                                                                                                                                                                                                                                                                                                                                                                                                                                                                                                                                                                                                                                                                                                                                                                                                                                                                                                                                                                                                                                                                                                                                                                                                                                                                                                                                                                                                                                                                                                                                                                                                                                                                                                                                                                                                                                                                                                                                                                                                                                                                                                                                                                                                                                                                                                                                                                                                                                                                                                                                                                                                                                                                                                                                                                                                                                                                                                                                                                                                                                                                                                                                                                                                                                                                                                                                                                                                                                                                                                                                                                                                                                                                                                                                                                                                                                                                                                                                                                                                                                                                                                                                                                                                                                                                                                                                                                                                                                                                                                                                                                                                                                                                                                                                                                                                                                                                                                                                                                                                                                                                                                                                                                                                                                                                                                                                                                                                                                                                                                                                                                                                                                                                                                                                                                                                                                                                                                                                                                                                                                                                                                                                                                                                                                  | 19746749 | 0.021166       | Polysaccharide                 | Proteobacterium: Gammaproteobacteria: Pseudomonas | Pseudomonas  |
| 154886_3  | Intracellular trafficking, assembly, and processing | Peptidases                                                                | D-alanyl-D-alanine amidase                                                                                                                                                                                                                                                                                                                                                                                                                                                                                                                                                                                                                                                                                                                                                                                                                                                                                                                                                                                                                                                                                                                                                                                                                                                                                                                                                                                                                                                                                                                                                                                                                                                                                                                                                                                                                                                                                                                                                                                                                                                                                                                                                                                                                                                                                                                                                                                                                                                                                                                                                                                                                                                                                                                                                                                                                                                                                                                                                                                                                                                                                                                                                                                                                                                                                                                                                                                                                                                                                                                                                                                                                                                                                                                                                                                                                                                                                                                                                                                                                                                                                                                                                                                                                                                                                                                                                                                                                                                                                                                                                                                                                                                                                                                                                                                                                                                                                                                                                                                                                                                                                                                                                                                                                                                                                                                                                                                                                                                                                                                                                                                                                                                                                                                                                                                                                                                                                                                                                                                                                                                                                                                                                                                                                                                                                                                                                                                                                                                                                                                                                                                                                                                                                                                                                                                                                                                                                                                                                                                                                                                                                                                                                                                                                                                                                                                                                                                                                                                                                                                                                                                                                                                                                                                                                                                                                                                                                                                                                                                                                                                                                    | 19704484 | 0.007280       | Polysaccharide                 | taxonomic annotation available                    |              |
| 174194_3  | No roles mapped out of 4 KOs                        | Sigma 54 dependent transcriptional regulator                              | Sigma 54 dependent transcriptional regulator                                                                                                                                                                                                                                                                                                                                                                                                                                                                                                                                                                                                                                                                                                                                                                                                                                                                                                                                                                                                                                                                                                                                                                                                                                                                                                                                                                                                                                                                                                                                                                                                                                                                                                                                                                                                                                                                                                                                                                                                                                                                                                                                                                                                                                                                                                                                                                                                                                                                                                                                                                                                                                                                                                                                                                                                                                                                                                                                                                                                                                                                                                                                                                                                                                                                                                                                                                                                                                                                                                                                                                                                                                                                                                                                                                                                                                                                                                                                                                                                                                                                                                                                                                                                                                                                                                                                                                                                                                                                                                                                                                                                                                                                                                                                                                                                                                                                                                                                                                                                                                                                                                                                                                                                                                                                                                                                                                                                                                                                                                                                                                                                                                                                                                                                                                                                                                                                                                                                                                                                                                                                                                                                                                                                                                                                                                                                                                                                                                                                                                                                                                                                                                                                                                                                                                                                                                                                                                                                                                                                                                                                                                                                                                                                                                                                                                                                                                                                                                                                                                                                                                                                                                                                                                                                                                                                                                                                                                                                                                                                                                                                  | 19129424 | 0.009798       | Polysaccharide                 | Proteobacterium: Gammaproteobacteria: Pseudomonas | Pseudomonas  |
| 523126_12 | No roles mapped out of 4 KOs                        | Endonuclease/phosphatase domain-containing protein                        | Endonuclease/phosphatase domain-containing protein                                                                                                                                                                                                                                                                                                                                                                                                                                                                                                                                                                                                                                                                                                                                                                                                                                                                                                                                                                                                                                                                                                                                                                                                                                                                                                                                                                                                                                                                                                                                                                                                                                                                                                                                                                                                                                                                                                                                                                                                                                                                                                                                                                                                                                                                                                                                                                                                                                                                                                                                                                                                                                                                                                                                                                                                                                                                                                                                                                                                                                                                                                                                                                                                                                                                                                                                                                                                                                                                                                                                                                                                                                                                                                                                                                                                                                                                                                                                                                                                                                                                                                                                                                                                                                                                                                                                                                                                                                                                                                                                                                                                                                                                                                                                                                                                                                                                                                                                                                                                                                                                                                                                                                                                                                                                                                                                                                                                                                                                                                                                                                                                                                                                                                                                                                                                                                                                                                                                                                                                                                                                                                                                                                                                                                                                                                                                                                                                                                                                                                                                                                                                                                                                                                                                                                                                                                                                                                                                                                                                                                                                                                                                                                                                                                                                                                                                                                                                                                                                                                                                                                                                                                                                                                                                                                                                                                                                                                                                                                                                                                                            | 19000627 | 0.044610       | Polysaccharide                 | Proteobacterium: Gammaproteobacteria: Pseudomonas | Pseudomonas  |
| 183243_1  | No roles mapped out of 4 KOs                        | RNA 5'-triphosphatase                                                     | RNA 5'-triphosphatase                                                                                                                                                                                                                                                                                                                                                                                                                                                                                                                                                                                                                                                                                                                                                                                                                                                                                                                                                                                                                                                                                                                                                                                                                                                                                                                                                                                                                                                                                                                                                                                                                                                                                                                                                                                                                                                                                                                                                                                                                                                                                                                                                                                                                                                                                                                                                                                                                                                                                                                                                                                                                                                                                                                                                                                                                                                                                                                                                                                                                                                                                                                                                                                                                                                                                                                                                                                                                                                                                                                                                                                                                                                                                                                                                                                                                                                                                                                                                                                                                                                                                                                                                                                                                                                                                                                                                                                                                                                                                                                                                                                                                                                                                                                                                                                                                                                                                                                                                                                                                                                                                                                                                                                                                                                                                                                                                                                                                                                                                                                                                                                                                                                                                                                                                                                                                                                                                                                                                                                                                                                                                                                                                                                                                                                                                                                                                                                                                                                                                                                                                                                                                                                                                                                                                                                                                                                                                                                                                                                                                                                                                                                                                                                                                                                                                                                                                                                                                                                                                                                                                                                                                                                                                                                                                                                                                                                                                                                                                                                                                                                                                         | 19008168 | 0.004203       | Polysaccharide                 | taxonomic annotation available                    |              |
| 541307_5  | No roles mapped out of 4 KOs                        | Prosthetic group, cofactors, and carriers                                 | 3-hydroxy-ACP reductase                                                                                                                                                                                                                                                                                                                                                                                                                                                                                                                                                                                                                                                                                                                                                                                                                                                                                                                                                                                                                                                                                                                                                                                                                                                                                                                                                                                                                                                                                                                                                                                                                                                                                                                                                                                                                                                                                                                                                                                                                                                                                                                                                                                                                                                                                                                                                                                                                                                                                                                                                                                                                                                                                                                                                                                                                                                                                                                                                                                                                                                                                                                                                                                                                                                                                                                                                                                                                                                                                                                                                                                                                                                                                                                                                                                                                                                                                                                                                                                                                                                                                                                                                                                                                                                                                                                                                                                                                                                                                                                                                                                                                                                                                                                                                                                                                                                                                                                                                                                                                                                                                                                                                                                                                                                                                                                                                                                                                                                                                                                                                                                                                                                                                                                                                                                                                                                                                                                                                                                                                                                                                                                                                                                                                                                                                                                                                                                                                                                                                                                                                                                                                                                                                                                                                                                                                                                                                                                                                                                                                                                                                                                                                                                                                                                                                                                                                                                                                                                                                                                                                                                                                                                                                                                                                                                                                                                                                                                                                                                                                                                                                       | 19081541 | 0.024909       | Polysaccharide                 | Proteobacterium: Gammaproteobacteria: Pseudomonas | Pseudomonas  |
| 851519_3  | Cofactor metabolism                                 | Pyruvate and thioester metabolism                                         | ClaA                                                                                                                                                                                                                                                                                                                                                                                                                                                                                                                                                                                                                                                                                                                                                                                                                                                                                                                                                                                                                                                                                                                                                                                                                                                                                                                                                                                                                                                                                                                                                                                                                                                                                                                                                                                                                                                                                                                                                                                                                                                                                                                                                                                                                                                                                                                                                                                                                                                                                                                                                                                                                                                                                                                                                                                                                                                                                                                                                                                                                                                                                                                                                                                                                                                                                                                                                                                                                                                                                                                                                                                                                                                                                                                                                                                                                                                                                                                                                                                                                                                                                                                                                                                                                                                                                                                                                                                                                                                                                                                                                                                                                                                                                                                                                                                                                                                                                                                                                                                                                                                                                                                                                                                                                                                                                                                                                                                                                                                                                                                                                                                                                                                                                                                                                                                                                                                                                                                                                                                                                                                                                                                                                                                                                                                                                                                                                                                                                                                                                                                                                                                                                                                                                                                                                                                                                                                                                                                                                                                                                                                                                                                                                                                                                                                                                                                                                                                                                                                                                                                                                                                                                                                                                                                                                                                                                                                                                                                                                                                                                                                                                                          | 18937476 | 0.011709       | Polysaccharide                 | taxonomic annotation available                    |              |
| 183033_4  | Transport and binding proteins                      | Proteinase K                                                              | Proteinase K                                                                                                                                                                                                                                                                                                                                                                                                                                                                                                                                                                                                                                                                                                                                                                                                                                                                                                                                                                                                                                                                                                                                                                                                                                                                                                                                                                                                                                                                                                                                                                                                                                                                                                                                                                                                                                                                                                                                                                                                                                                                                                                                                                                                                                                                                                                                                                                                                                                                                                                                                                                                                                                                                                                                                                                                                                                                                                                                                                                                                                                                                                                                                                                                                                                                                                                                                                                                                                                                                                                                                                                                                                                                                                                                                                                                                                                                                                                                                                                                                                                                                                                                                                                                                                                                                                                                                                                                                                                                                                                                                                                                                                                                                                                                                                                                                                                                                                                                                                                                                                                                                                                                                                                                                                                                                                                                                                                                                                                                                                                                                                                                                                                                                                                                                                                                                                                                                                                                                                                                                                                                                                                                                                                                                                                                                                                                                                                                                                                                                                                                                                                                                                                                                                                                                                                                                                                                                                                                                                                                                                                                                                                                                                                                                                                                                                                                                                                                                                                                                                                                                                                                                                                                                                                                                                                                                                                                                                                                                                                                                                                                                                  | 18382147 | 0.015443       | Polysaccharide                 | Proteobacterium: Gammaproteobacteria: Pseudomonas | Pseudomonas  |
| 123222_4  | Intracellular trafficking, assembly, and processing | Chaperone and folding catalysis                                           | ABC transporter domain-containing protein                                                                                                                                                                                                                                                                                                                                                                                                                                                                                                                                                                                                                                                                                                                                                                                                                                                                                                                                                                                                                                                                                                                                                                                                                                                                                                                                                                                                                                                                                                                                                                                                                                                                                                                                                                                                                                                                                                                                                                                                                                                                                                                                                                                                                                                                                                                                                                                                                                                                                                                                                                                                                                                                                                                                                                                                                                                                                                                                                                                                                                                                                                                                                                                                                                                                                                                                                                                                                                                                                                                                                                                                                                                                                                                                                                                                                                                                                                                                                                                                                                                                                                                                                                                                                                                                                                                                                                                                                                                                                                                                                                                                                                                                                                                                                                                                                                                                                                                                                                                                                                                                                                                                                                                                                                                                                                                                                                                                                                                                                                                                                                                                                                                                                                                                                                                                                                                                                                                                                                                                                                                                                                                                                                                                                                                                                                                                                                                                                                                                                                                                                                                                                                                                                                                                                                                                                                                                                                                                                                                                                                                                                                                                                                                                                                                                                                                                                                                                                                                                                                                                                                                                                                                                                                                                                                                                                                                                                                                                                                                                                                                                     | 18320779 | 0.005168       | Polysaccharide                 | taxonomic annotation available                    |              |
| 183428_5  | Fatty acid and lipid metabolism                     | Biochemistry of unsaturated fatty acids                                   | Chaperone SurA                                                                                                                                                                                                                                                                                                                                                                                                                                                                                                                                                                                                                                                                                                                                                                                                                                                                                                                                                                                                                                                                                                                                                                                                                                                                                                                                                                                                                                                                                                                                                                                                                                                                                                                                                                                                                                                                                                                                                                                                                                                                                                                                                                                                                                                                                                                                                                                                                                                                                                                                                                                                                                                                                                                                                                                                                                                                                                                                                                                                                                                                                                                                                                                                                                                                                                                                                                                                                                                                                                                                                                                                                                                                                                                                                                                                                                                                                                                                                                                                                                                                                                                                                                                                                                                                                                                                                                                                                                                                                                                                                                                                                                                                                                                                                                                                                                                                                                                                                                                                                                                                                                                                                                                                                                                                                                                                                                                                                                                                                                                                                                                                                                                                                                                                                                                                                                                                                                                                                                                                                                                                                                                                                                                                                                                                                                                                                                                                                                                                                                                                                                                                                                                                                                                                                                                                                                                                                                                                                                                                                                                                                                                                                                                                                                                                                                                                                                                                                                                                                                                                                                                                                                                                                                                                                                                                                                                                                                                                                                                                                                                                                                | 18378184 | 0.027514       | Polysaccharide                 | taxonomic annotation available                    |              |
| 1757370_3 | Transport and binding proteins                      | Amino acids, peptides and amines                                          | L-carnitine dehydrogenase                                                                                                                                                                                                                                                                                                                                                                                                                                                                                                                                                                                                                                                                                                                                                                                                                                                                                                                                                                                                                                                                                                                                                                                                                                                                                                                                                                                                                                                                                                                                                                                                                                                                                                                                                                                                                                                                                                                                                                                                                                                                                                                                                                                                                                                                                                                                                                                                                                                                                                                                                                                                                                                                                                                                                                                                                                                                                                                                                                                                                                                                                                                                                                                                                                                                                                                                                                                                                                                                                                                                                                                                                                                                                                                                                                                                                                                                                                                                                                                                                                                                                                                                                                                                                                                                                                                                                                                                                                                                                                                                                                                                                                                                                                                                                                                                                                                                                                                                                                                                                                                                                                                                                                                                                                                                                                                                                                                                                                                                                                                                                                                                                                                                                                                                                                                                                                                                                                                                                                                                                                                                                                                                                                                                                                                                                                                                                                                                                                                                                                                                                                                                                                                                                                                                                                                                                                                                                                                                                                                                                                                                                                                                                                                                                                                                                                                                                                                                                                                                                                                                                                                                                                                                                                                                                                                                                                                                                                                                                                                                                                                                                     | 18295804 | 0.015188       | Polysaccharide                 | Proteobacterium: Gammaproteobacteria: Pseudomonas | Pseudomonas  |
| 150127_1  | Translocation                                       | RNA and ribase modification                                               | OpaC domain-containing protein                                                                                                                                                                                                                                                                                                                                                                                                                                                                                                                                                                                                                                                                                                                                                                                                                                                                                                                                                                                                                                                                                                                                                                                                                                                                                                                                                                                                                                                                                                                                                                                                                                                                                                                                                                                                                                                                                                                                                                                                                                                                                                                                                                                                                                                                                                                                                                                                                                                                                                                                                                                                                                                                                                                                                                                                                                                                                                                                                                                                                                                                                                                                                                                                                                                                                                                                                                                                                                                                                                                                                                                                                                                                                                                                                                                                                                                                                                                                                                                                                                                                                                                                                                                                                                                                                                                                                                                                                                                                                                                                                                                                                                                                                                                                                                                                                                                                                                                                                                                                                                                                                                                                                                                                                                                                                                                                                                                                                                                                                                                                                                                                                                                                                                                                                                                                                                                                                                                                                                                                                                                                                                                                                                                                                                                                                                                                                                                                                                                                                                                                                                                                                                                                                                                                                                                                                                                                                                                                                                                                                                                                                                                                                                                                                                                                                                                                                                                                                                                                                                                                                                                                                                                                                                                                                                                                                                                                                                                                                                                                                                                                                | 18496898 | 0.006176       | Polysaccharide                 | taxonomic annotation available                    |              |
| 154407_4  | Transport and binding proteins                      | RNA and ribase modification                                               | RNA(AC) RNA(UC)-C5'-methyltransferase                                                                                                                                                                                                                                                                                                                                                                                                                                                                                                                                                                                                                                                                                                                                                                                                                                                                                                                                                                                                                                                                                                                                                                                                                                                                                                                                                                                                                                                                                                                                                                                                                                                                                                                                                                                                                                                                                                                                                                                                                                                                                                                                                                                                                                                                                                                                                                                                                                                                                                                                                                                                                                                                                                                                                                                                                                                                                                                                                                                                                                                                                                                                                                                                                                                                                                                                                                                                                                                                                                                                                                                                                                                                                                                                                                                                                                                                                                                                                                                                                                                                                                                                                                                                                                                                                                                                                                                                                                                                                                                                                                                                                                                                                                                                                                                                                                                                                                                                                                                                                                                                                                                                                                                                                                                                                                                                                                                                                                                                                                                                                                                                                                                                                                                                                                                                                                                                                                                                                                                                                                                                                                                                                                                                                                                                                                                                                                                                                                                                                                                                                                                                                                                                                                                                                                                                                                                                                                                                                                                                                                                                                                                                                                                                                                                                                                                                                                                                                                                                                                                                                                                                                                                                                                                                                                                                                                                                                                                                                                                                                                                                         | 17999457 | 0.018898       | Polysaccharide                 | taxonomic annotation available                    |              |
| 154206_4  | No roles mapped out of 4 KOs                        | Amino acids, peptides and amines                                          | L-lysine-binding periplasmic protein                                                                                                                                                                                                                                                                                                                                                                                                                                                                                                                                                                                                                                                                                                                                                                                                                                                                                                                                                                                                                                                                                                                                                                                                                                                                                                                                                                                                                                                                                                                                                                                                                                                                                                                                                                                                                                                                                                                                                                                                                                                                                                                                                                                                                                                                                                                                                                                                                                                                                                                                                                                                                                                                                                                                                                                                                                                                                                                                                                                                                                                                                                                                                                                                                                                                                                                                                                                                                                                                                                                                                                                                                                                                                                                                                                                                                                                                                                                                                                                                                                                                                                                                                                                                                                                                                                                                                                                                                                                                                                                                                                                                                                                                                                                                                                                                                                                                                                                                                                                                                                                                                                                                                                                                                                                                                                                                                                                                                                                                                                                                                                                                                                                                                                                                                                                                                                                                                                                                                                                                                                                                                                                                                                                                                                                                                                                                                                                                                                                                                                                                                                                                                                                                                                                                                                                                                                                                                                                                                                                                                                                                                                                                                                                                                                                                                                                                                                                                                                                                                                                                                                                                                                                                                                                                                                                                                                                                                                                                                                                                                                                                          | 17959233 | 0.002601       | Polysaccharide                 | Proteobacterium: Gammaproteobacteria: Pseudomonas | Pseudomonas  |
| 823384_3  | Transport and binding proteins                      | Amino acids, peptides and amines                                          | Proton motive force transducer                                                                                                                                                                                                                                                                                                                                                                                                                                                                                                                                                                                                                                                                                                                                                                                                                                                                                                                                                                                                                                                                                                                                                                                                                                                                                                                                                                                                                                                                                                                                                                                                                                                                                                                                                                                                                                                                                                                                                                                                                                                                                                                                                                                                                                                                                                                                                                                                                                                                                                                                                                                                                                                                                                                                                                                                                                                                                                                                                                                                                                                                                                                                                                                                                                                                                                                                                                                                                                                                                                                                                                                                                                                                                                                                                                                                                                                                                                                                                                                                                                                                                                                                                                                                                                                                                                                                                                                                                                                                                                                                                                                                                                                                                                                                                                                                                                                                                                                                                                                                                                                                                                                                                                                                                                                                                                                                                                                                                                                                                                                                                                                                                                                                                                                                                                                                                                                                                                                                                                                                                                                                                                                                                                                                                                                                                                                                                                                                                                                                                                                                                                                                                                                                                                                                                                                                                                                                                                                                                                                                                                                                                                                                                                                                                                                                                                                                                                                                                                                                                                                                                                                                                                                                                                                                                                                                                                                                                                                                                                                                                                                                                | 17848452 | 0.010788       | Polysaccharide                 | taxonomic annotation available                    |              |
| 46086_8   | Transport and binding proteins                      | Amino acids, peptides and amines                                          | ABC transporter domain-containing protein                                                                                                                                                                                                                                                                                                                                                                                                                                                                                                                                                                                                                                                                                                                                                                                                                                                                                                                                                                                                                                                                                                                                                                                                                                                                                                                                                                                                                                                                                                                                                                                                                                                                                                                                                                                                                                                                                                                                                                                                                                                                                                                                                                                                                                                                                                                                                                                                                                                                                                                                                                                                                                                                                                                                                                                                                                                                                                                                                                                                                                                                                                                                                                                                                                                                                                                                                                                                                                                                                                                                                                                                                                                                                                                                                                                                                                                                                                                                                                                                                                                                                                                                                                                                                                                                                                                                                                                                                                                                                                                                                                                                                                                                                                                                                                                                                                                                                                                                                                                                                                                                                                                                                                                                                                                                                                                                                                                                                                                                                                                                                                                                                                                                                                                                                                                                                                                                                                                                                                                                                                                                                                                                                                                                                                                                                                                                                                                                                                                                                                                                                                                                                                                                                                                                                                                                                                                                                                                                                                                                                                                                                                                                                                                                                                                                                                                                                                                                                                                                                                                                                                                                                                                                                                                                                                                                                                                                                                                                                                                                                                                                     | 17805781 | 0.020072       | Polysaccharide                 | Proteobacterium: Gammaproteobacteria: Pseudomonas | Pseudomonas  |
| 79572_9   | Cell motility and chemotaxis                        | Flagellar complex and associated proteins                                 | High-affinity branched-chain amino acid transporter ATP-binding protein                                                                                                                                                                                                                                                                                                                                                                                                                                                                                                                                                                                                                                                                                                                                                                                                                                                                                                                                                                                                                                                                                                                                                                                                                                                                                                                                                                                                                                                                                                                                                                                                                                                                                                                                                                                                                                                                                                                                                                                                                                                                                                                                                                                                                                                                                                                                                                                                                                                                                                                                                                                                                                                                                                                                                                                                                                                                                                                                                                                                                                                                                                                                                                                                                                                                                                                                                                                                                                                                                                                                                                                                                                                                                                                                                                                                                                                                                                                                                                                                                                                                                                                                                                                                                                                                                                                                                                                                                                                                                                                                                                                                                                                                                                                                                                                                                                                                                                                                                                                                                                                                                                                                                                                                                                                                                                                                                                                                                                                                                                                                                                                                                                                                                                                                                                                                                                                                                                                                                                                                                                                                                                                                                                                                                                                                                                                                                                                                                                                                                                                                                                                                                                                                                                                                                                                                                                                                                                                                                                                                                                                                                                                                                                                                                                                                                                                                                                                                                                                                                                                                                                                                                                                                                                                                                                                                                                                                                                                                                                                                                                       | 17761306 | 0.002468       | Polysaccharide                 | taxonomic annotation available                    |              |
| 102702_9  | No roles mapped out of 4 KOs                        | Polysaccharide and lipopolysaccharide metabolism                          | Transcriptional regulator MntA                                                                                                                                                                                                                                                                                                                                                                                                                                                                                                                                                                                                                                                                                                                                                                                                                                                                                                                                                                                                                                                                                                                                                                                                                                                                                                                                                                                                                                                                                                                                                                                                                                                                                                                                                                                                                                                                                                                                                                                                                                                                                                                                                                                                                                                                                                                                                                                                                                                                                                                                                                                                                                                                                                                                                                                                                                                                                                                                                                                                                                                                                                                                                                                                                                                                                                                                                                                                                                                                                                                                                                                                                                                                                                                                                                                                                                                                                                                                                                                                                                                                                                                                                                                                                                                                                                                                                                                                                                                                                                                                                                                                                                                                                                                                                                                                                                                                                                                                                                                                                                                                                                                                                                                                                                                                                                                                                                                                                                                                                                                                                                                                                                                                                                                                                                                                                                                                                                                                                                                                                                                                                                                                                                                                                                                                                                                                                                                                                                                                                                                                                                                                                                                                                                                                                                                                                                                                                                                                                                                                                                                                                                                                                                                                                                                                                                                                                                                                                                                                                                                                                                                                                                                                                                                                                                                                                                                                                                                                                                                                                                                                                | 17424857 | 0.012631       | Polysaccharide                 | Proteobacterium: Gammaproteobacteria: Pseudomonas | Pseudomonas  |
| 98177_2   | No roles mapped out of 4 KOs                        | RNA and ribase modification                                               | Uncharacterized protein T                                                                                                                                                                                                                                                                                                                                                                                                                                                                                                                                                                                                                                                                                                                                                                                                                                                                                                                                                                                                                                                                                                                                                                                                                                                                                                                                                                                                                                                                                                                                                                                                                                                                                                                                                                                                                                                                                                                                                                                                                                                                                                                                                                                                                                                                                                                                                                                                                                                                                                                                                                                                                                                                                                                                                                                                                                                                                                                                                                                                                                                                                                                                                                                                                                                                                                                                                                                                                                                                                                                                                                                                                                                                                                                                                                                                                                                                                                                                                                                                                                                                                                                                                                                                                                                                                                                                                                                                                                                                                                                                                                                                                                                                                                                                                                                                                                                                                                                                                                                                                                                                                                                                                                                                                                                                                                                                                                                                                                                                                                                                                                                                                                                                                                                                                                                                                                                                                                                                                                                                                                                                                                                                                                                                                                                                                                                                                                                                                                                                                                                                                                                                                                                                                                                                                                                                                                                                                                                                                                                                                                                                                                                                                                                                                                                                                                                                                                                                                                                                                                                                                                                                                                                                                                                                                                                                                                                                                                                                                                                                                                                                                     | 17422812 | 0.044702       | Polysaccharide                 | taxonomic annotation available                    |              |
| 2354_4    | Transport and binding proteins                      | Amino acids                                                               | Uncharacterized protein T                                                                                                                                                                                                                                                                                                                                                                                                                                                                                                                                                                                                                                                                                                                                                                                                                                                                                                                                                                                                                                                                                                                                                                                                                                                                                                                                                                                                                                                                                                                                                                                                                                                                                                                                                                                                                                                                                                                                                                                                                                                                                                                                                                                                                                                                                                                                                                                                                                                                                                                                                                                                                                                                                                                                                                                                                                                                                                                                                                                                                                                                                                                                                                                                                                                                                                                                                                                                                                                                                                                                                                                                                                                                                                                                                                                                                                                                                                                                                                                                                                                                                                                                                                                                                                                                                                                                                                                                                                                                                                                                                                                                                                                                                                                                                                                                                                                                                                                                                                                                                                                                                                                                                                                                                                                                                                                                                                                                                                                                                                                                                                                                                                                                                                                                                                                                                                                                                                                                                                                                                                                                                                                                                                                                                                                                                                                                                                                                                                                                                                                                                                                                                                                                                                                                                                                                                                                                                                                                                                                                                                                                                                                                                                                                                                                                                                                                                                                                                                                                                                                                                                                                                                                                                                                                                                                                                                                                                                                                                                                                                                                                                     | 17426207 | 0.041911       | Polysaccharide                 | taxonomic annotation available                    |              |
| 70198_4   | No roles mapped out of 4 KOs                        | RNA polymerase                                                            | DNA polymerase                                                                                                                                                                                                                                                                                                                                                                                                                                                                                                                                                                                                                                                                                                                                                                                                                                                                                                                                                                                                                                                                                                                                                                                                                                                                                                                                                                                                                                                                                                                                                                                                                                                                                                                                                                                                                                                                                                                                                                                                                                                                                                                                                                                                                                                                                                                                                                                                                                                                                                                                                                                                                                                                                                                                                                                                                                                                                                                                                                                                                                                                                                                                                                                                                                                                                                                                                                                                                                                                                                                                                                                                                                                                                                                                                                                                                                                                                                                                                                                                                                                                                                                                                                                                                                                                                                                                                                                                                                                                                                                                                                                                                                                                                                                                                                                                                                                                                                                                                                                                                                                                                                                                                                                                                                                                                                                                                                                                                                                                                                                                                                                                                                                                                                                                                                                                                                                                                                                                                                                                                                                                                                                                                                                                                                                                                                                                                                                                                                                                                                                                                                                                                                                                                                                                                                                                                                                                                                                                                                                                                                                                                                                                                                                                                                                                                                                                                                                                                                                                                                                                                                                                                                                                                                                                                                                                                                                                                                                                                                                                                                                                                                | 17294243 | 0.021371       | Polysaccharide                 | Proteobacterium: Gammaproteobacteria: Pseudomonas | Pseudomonas  |
| 80092_3   | Cell motility and chemotaxis                        | Flagellar complex and associated proteins                                 | Flagellar motor stator protein                                                                                                                                                                                                                                                                                                                                                                                                                                                                                                                                                                                                                                                                                                                                                                                                                                                                                                                                                                                                                                                                                                                                                                                                                                                                                                                                                                                                                                                                                                                                                                                                                                                                                                                                                                                                                                                                                                                                                                                                                                                                                                                                                                                                                                                                                                                                                                                                                                                                                                                                                                                                                                                                                                                                                                                                                                                                                                                                                                                                                                                                                                                                                                                                                                                                                                                                                                                                                                                                                                                                                                                                                                                                                                                                                                                                                                                                                                                                                                                                                                                                                                                                                                                                                                                                                                                                                                                                                                                                                                                                                                                                                                                                                                                                                                                                                                                                                                                                                                                                                                                                                                                                                                                                                                                                                                                                                                                                                                                                                                                                                                                                                                                                                                                                                                                                                                                                                                                                                                                                                                                                                                                                                                                                                                                                                                                                                                                                                                                                                                                                                                                                                                                                                                                                                                                                                                                                                                                                                                                                                                                                                                                                                                                                                                                                                                                                                                                                                                                                                                                                                                                                                                                                                                                                                                                                                                                                                                                                                                                                                                                                                | 17131926 | 0.048901       | Polysaccharide                 | Proteobacterium: Gammaproteobacteria: Pseudomonas | Pseudomonas  |
| 119312_1  | Transport and binding proteins                      | Carbohydrates, organic alcohols, and acids                                | Arabinose import ATP-binding protein AraG                                                                                                                                                                                                                                                                                                                                                                                                                                                                                                                                                                                                                                                                                                                                                                                                                                                                                                                                                                                                                                                                                                                                                                                                                                                                                                                                                                                                                                                                                                                                                                                                                                                                                                                                                                                                                                                                                                                                                                                                                                                                                                                                                                                                                                                                                                                                                                                                                                                                                                                                                                                                                                                                                                                                                                                                                                                                                                                                                                                                                                                                                                                                                                                                                                                                                                                                                                                                                                                                                                                                                                                                                                                                                                                                                                                                                                                                                                                                                                                                                                                                                                                                                                                                                                                                                                                                                                                                                                                                                                                                                                                                                                                                                                                                                                                                                                                                                                                                                                                                                                                                                                                                                                                                                                                                                                                                                                                                                                                                                                                                                                                                                                                                                                                                                                                                                                                                                                                                                                                                                                                                                                                                                                                                                                                                                                                                                                                                                                                                                                                                                                                                                                                                                                                                                                                                                                                                                                                                                                                                                                                                                                                                                                                                                                                                                                                                                                                                                                                                                                                                                                                                                                                                                                                                                                                                                                                                                                                                                                                                                                                                     | 17154723 | 0.004897       | Polysaccharide                 | Proteobacterium: Gammaproteobacteria: Pseudomonas | Pseudomonas  |
| 103167_11 | No roles mapped out of 4 KOs                        | RNA and DNA repair                                                        | PhcA                                                                                                                                                                                                                                                                                                                                                                                                                                                                                                                                                                                                                                                                                                                                                                                                                                                                                                                                                                                                                                                                                                                                                                                                                                                                                                                                                                                                                                                                                                                                                                                                                                                                                                                                                                                                                                                                                                                                                                                                                                                                                                                                                                                                                                                                                                                                                                                                                                                                                                                                                                                                                                                                                                                                                                                                                                                                                                                                                                                                                                                                                                                                                                                                                                                                                                                                                                                                                                                                                                                                                                                                                                                                                                                                                                                                                                                                                                                                                                                                                                                                                                                                                                                                                                                                                                                                                                                                                                                                                                                                                                                                                                                                                                                                                                                                                                                                                                                                                                                                                                                                                                                                                                                                                                                                                                                                                                                                                                                                                                                                                                                                                                                                                                                                                                                                                                                                                                                                                                                                                                                                                                                                                                                                                                                                                                                                                                                                                                                                                                                                                                                                                                                                                                                                                                                                                                                                                                                                                                                                                                                                                                                                                                                                                                                                                                                                                                                                                                                                                                                                                                                                                                                                                                                                                                                                                                                                                                                                                                                                                                                                                                          | 17152447 | 0.015897       | Polysaccharide                 | Proteobacterium: Gammaproteobacteria: Pseudomonas | Pseudomonas  |
| 154206_2  | Signal transduction                                 | Taxis                                                                     | Chemotaxis proteins                                                                                                                                                                                                                                                                                                                                                                                                                                                                                                                                                                                                                                                                                                                                                                                                                                                                                                                                                                                                                                                                                                                                                                                                                                                                                                                                                                                                                                                                                                                                                                                                                                                                                                                                                                                                                                                                                                                                                                                                                                                                                                                                                                                                                                                                                                                                                                                                                                                                                                                                                                                                                                                                                                                                                                                                                                                                                                                                                                                                                                                                                                                                                                                                                                                                                                                                                                                                                                                                                                                                                                                                                                                                                                                                                                                                                                                                                                                                                                                                                                                                                                                                                                                                                                                                                                                                                                                                                                                                                                                                                                                                                                                                                                                                                                                                                                                                                                                                                                                                                                                                                                                                                                                                                                                                                                                                                                                                                                                                                                                                                                                                                                                                                                                                                                                                                                                                                                                                                                                                                                                                                                                                                                                                                                                                                                                                                                                                                                                                                                                                                                                                                                                                                                                                                                                                                                                                                                                                                                                                                                                                                                                                                                                                                                                                                                                                                                                                                                                                                                                                                                                                                                                                                                                                                                                                                                                                                                                                                                                                                                                                                           | 16992921 | 0.030926       | Polysaccharide                 | Proteobacterium: Gammaproteobacteria: Pseudomonas | Pseudomonas  |
| 759843_3  | Translocation                                       | Ribosomal proteins: synthesis and modification                            | S05 ribosomal protein L2                                                                                                                                                                                                                                                                                                                                                                                                                                                                                                                                                                                                                                                                                                                                                                                                                                                                                                                                                                                                                                                                                                                                                                                                                                                                                                                                                                                                                                                                                                                                                                                                                                                                                                                                                                                                                                                                                                                                                                                                                                                                                                                                                                                                                                                                                                                                                                                                                                                                                                                                                                                                                                                                                                                                                                                                                                                                                                                                                                                                                                                                                                                                                                                                                                                                                                                                                                                                                                                                                                                                                                                                                                                                                                                                                                                                                                                                                                                                                                                                                                                                                                                                                                                                                                                                                                                                                                                                                                                                                                                                                                                                                                                                                                                                                                                                                                                                                                                                                                                                                                                                                                                                                                                                                                                                                                                                                                                                                                                                                                                                                                                                                                                                                                                                                                                                                                                                                                                                                                                                                                                                                                                                                                                                                                                                                                                                                                                                                                                                                                                                                                                                                                                                                                                                                                                                                                                                                                                                                                                                                                                                                                                                                                                                                                                                                                                                                                                                                                                                                                                                                                                                                                                                                                                                                                                                                                                                                                                                                                                                                                                                                      | 16926394 | 0.032840       | Polysaccharide                 | Proteobacterium: Betaproteobacteria: Burkholderia | Burkholderia |
| 150127_3  | No roles mapped out of 4 KOs                        | Transcriptional regulation                                                | Transcriptional regulator, LysR family                                                                                                                                                                                                                                                                                                                                                                                                                                                                                                                                                                                                                                                                                                                                                                                                                                                                                                                                                                                                                                                                                                                                                                                                                                                                                                                                                                                                                                                                                                                                                                                                                                                                                                                                                                                                                                                                                                                                                                                                                                                                                                                                                                                                                                                                                                                                                                                                                                                                                                                                                                                                                                                                                                                                                                                                                                                                                                                                                                                                                                                                                                                                                                                                                                                                                                                                                                                                                                                                                                                                                                                                                                                                                                                                                                                                                                                                                                                                                                                                                                                                                                                                                                                                                                                                                                                                                                                                                                                                                                                                                                                                                                                                                                                                                                                                                                                                                                                                                                                                                                                                                                                                                                                                                                                                                                                                                                                                                                                                                                                                                                                                                                                                                                                                                                                                                                                                                                                                                                                                                                                                                                                                                                                                                                                                                                                                                                                                                                                                                                                                                                                                                                                                                                                                                                                                                                                                                                                                                                                                                                                                                                                                                                                                                                                                                                                                                                                                                                                                                                                                                                                                                                                                                                                                                                                                                                                                                                                                                                                                                                                                        | 16888858 | 0.043668       | Polysaccharide                 | taxonomic annotation available                    |              |
| 40366_3   | Transport and binding proteins                      | Amino acids, peptides and amines                                          | Periplasmic chaperone and Csa synthase                                                                                                                                                                                                                                                                                                                                                                                                                                                                                                                                                                                                                                                                                                                                                                                                                                                                                                                                                                                                                                                                                                                                                                                                                                                                                                                                                                                                                                                                                                                                                                                                                                                                                                                                                                                                                                                                                                                                                                                                                                                                                                                                                                                                                                                                                                                                                                                                                                                                                                                                                                                                                                                                                                                                                                                                                                                                                                                                                                                                                                                                                                                                                                                                                                                                                                                                                                                                                                                                                                                                                                                                                                                                                                                                                                                                                                                                                                                                                                                                                                                                                                                                                                                                                                                                                                                                                                                                                                                                                                                                                                                                                                                                                                                                                                                                                                                                                                                                                                                                                                                                                                                                                                                                                                                                                                                                                                                                                                                                                                                                                                                                                                                                                                                                                                                                                                                                                                                                                                                                                                                                                                                                                                                                                                                                                                                                                                                                                                                                                                                                                                                                                                                                                                                                                                                                                                                                                                                                                                                                                                                                                                                                                                                                                                                                                                                                                                                                                                                                                                                                                                                                                                                                                                                                                                                                                                                                                                                                                                                                                                                                        | 16829793 | 0.021772       | Polysaccharide                 | taxonomic annotation available                    |              |
| 154206_2  | Transport and binding proteins                      | Carbohydrates, organic alcohols, and acids                                | L-lysine-binding periplasmic protein                                                                                                                                                                                                                                                                                                                                                                                                                                                                                                                                                                                                                                                                                                                                                                                                                                                                                                                                                                                                                                                                                                                                                                                                                                                                                                                                                                                                                                                                                                                                                                                                                                                                                                                                                                                                                                                                                                                                                                                                                                                                                                                                                                                                                                                                                                                                                                                                                                                                                                                                                                                                                                                                                                                                                                                                                                                                                                                                                                                                                                                                                                                                                                                                                                                                                                                                                                                                                                                                                                                                                                                                                                                                                                                                                                                                                                                                                                                                                                                                                                                                                                                                                                                                                                                                                                                                                                                                                                                                                                                                                                                                                                                                                                                                                                                                                                                                                                                                                                                                                                                                                                                                                                                                                                                                                                                                                                                                                                                                                                                                                                                                                                                                                                                                                                                                                                                                                                                                                                                                                                                                                                                                                                                                                                                                                                                                                                                                                                                                                                                                                                                                                                                                                                                                                                                                                                                                                                                                                                                                                                                                                                                                                                                                                                                                                                                                                                                                                                                                                                                                                                                                                                                                                                                                                                                                                                                                                                                                                                                                                                                                          | 16743761 | 0.003183       | Polysaccharide                 | Proteobacterium: Gammaproteobacteria: Pseudomonas | Pseudomonas  |
| 150127_1  | No roles mapped out of 4 KOs                        | Amino acids, peptides and amines                                          | UtrA                                                                                                                                                                                                                                                                                                                                                                                                                                                                                                                                                                                                                                                                                                                                                                                                                                                                                                                                                                                                                                                                                                                                                                                                                                                                                                                                                                                                                                                                                                                                                                                                                                                                                                                                                                                                                                                                                                                                                                                                                                                                                                                                                                                                                                                                                                                                                                                                                                                                                                                                                                                                                                                                                                                                                                                                                                                                                                                                                                                                                                                                                                                                                                                                                                                                                                                                                                                                                                                                                                                                                                                                                                                                                                                                                                                                                                                                                                                                                                                                                                                                                                                                                                                                                                                                                                                                                                                                                                                                                                                                                                                                                                                                                                                                                                                                                                                                                                                                                                                                                                                                                                                                                                                                                                                                                                                                                                                                                                                                                                                                                                                                                                                                                                                                                                                                                                                                                                                                                                                                                                                                                                                                                                                                                                                                                                                                                                                                                                                                                                                                                                                                                                                                                                                                                                                                                                                                                                                                                                                                                                                                                                                                                                                                                                                                                                                                                                                                                                                                                                                                                                                                                                                                                                                                                                                                                                                                                                                                                                                                                                                                                                          | 16691415 | 0.009808       | Polysaccharide                 | Proteobacterium: Gammaproteobacteria: Pseudomonas | Pseudomonas  |
| 162665_5  | Transport and binding proteins                      | Amino acids, peptides and amines                                          | UtrA                                                                                                                                                                                                                                                                                                                                                                                                                                                                                                                                                                                                                                                                                                                                                                                                                                                                                                                                                                                                                                                                                                                                                                                                                                                                                                                                                                                                                                                                                                                                                                                                                                                                                                                                                                                                                                                                                                                                                                                                                                                                                                                                                                                                                                                                                                                                                                                                                                                                                                                                                                                                                                                                                                                                                                                                                                                                                                                                                                                                                                                                                                                                                                                                                                                                                                                                                                                                                                                                                                                                                                                                                                                                                                                                                                                                                                                                                                                                                                                                                                                                                                                                                                                                                                                                                                                                                                                                                                                                                                                                                                                                                                                                                                                                                                                                                                                                                                                                                                                                                                                                                                                                                                                                                                                                                                                                                                                                                                                                                                                                                                                                                                                                                                                                                                                                                                                                                                                                                                                                                                                                                                                                                                                                                                                                                                                                                                                                                                                                                                                                                                                                                                                                                                                                                                                                                                                                                                                                                                                                                                                                                                                                                                                                                                                                                                                                                                                                                                                                                                                                                                                                                                                                                                                                                                                                                                                                                                                                                                                                                                                                                                          | 16468941 | 0.015763       | Polysaccharide                 | Proteobacterium: Gammaproteobacteria: Pseudomonas | Pseudomonas  |
| 85391_3   | Transport and binding proteins                      | Taxis                                                                     | Chemotaxis proteins                                                                                                                                                                                                                                                                                                                                                                                                                                                                                                                                                                                                                                                                                                                                                                                                                                                                                                                                                                                                                                                                                                                                                                                                                                                                                                                                                                                                                                                                                                                                                                                                                                                                                                                                                                                                                                                                                                                                                                                                                                                                                                                                                                                                                                                                                                                                                                                                                                                                                                                                                                                                                                                                                                                                                                                                                                                                                                                                                                                                                                                                                                                                                                                                                                                                                                                                                                                                                                                                                                                                                                                                                                                                                                                                                                                                                                                                                                                                                                                                                                                                                                                                                                                                                                                                                                                                                                                                                                                                                                                                                                                                                                                                                                                                                                                                                                                                                                                                                                                                                                                                                                                                                                                                                                                                                                                                                                                                                                                                                                                                                                                                                                                                                                                                                                                                                                                                                                                                                                                                                                                                                                                                                                                                                                                                                                                                                                                                                                                                                                                                                                                                                                                                                                                                                                                                                                                                                                                                                                                                                                                                                                                                                                                                                                                                                                                                                                                                                                                                                                                                                                                                                                                                                                                                                                                                                                                                                                                                                                                                                                                                                           | 16468941 | 0.015763       | Polysaccharide                 | Proteobacterium: Gammaproteobacteria: Pseudomonas | Pseudomonas  |
| 145125_1  | No roles mapped out of 4 KOs                        | Amino acids, peptides and amines                                          | GlnK                                                                                                                                                                                                                                                                                                                                                                                                                                                                                                                                                                                                                                                                                                                                                                                                                                                                                                                                                                                                                                                                                                                                                                                                                                                                                                                                                                                                                                                                                                                                                                                                                                                                                                                                                                                                                                                                                                                                                                                                                                                                                                                                                                                                                                                                                                                                                                                                                                                                                                                                                                                                                                                                                                                                                                                                                                                                                                                                                                                                                                                                                                                                                                                                                                                                                                                                                                                                                                                                                                                                                                                                                                                                                                                                                                                                                                                                                                                                                                                                                                                                                                                                                                                                                                                                                                                                                                                                                                                                                                                                                                                                                                                                                                                                                                                                                                                                                                                                                                                                                                                                                                                                                                                                                                                                                                                                                                                                                                                                                                                                                                                                                                                                                                                                                                                                                                                                                                                                                                                                                                                                                                                                                                                                                                                                                                                                                                                                                                                                                                                                                                                                                                                                                                                                                                                                                                                                                                                                                                                                                                                                                                                                                                                                                                                                                                                                                                                                                                                                                                                                                                                                                                                                                                                                                                                                                                                                                                                                                                                                                                                                                                          | 16468939 | 0.009454       | Polysaccharide                 | Proteobacterium: Gammaproteobacteria: Pseudomonas | Pseudomonas  |
| 169141_4  | No roles mapped out of 4 KOs                        | ATP-dependent helixase                                                    | Uncharacterized protein T                                                                                                                                                                                                                                                                                                                                                                                                                                                                                                                                                                                                                                                                                                                                                                                                                                                                                                                                                                                                                                                                                                                                                                                                                                                                                                                                                                                                                                                                                                                                                                                                                                                                                                                                                                                                                                                                                                                                                                                                                                                                                                                                                                                                                                                                                                                                                                                                                                                                                                                                                                                                                                                                                                                                                                                                                                                                                                                                                                                                                                                                                                                                                                                                                                                                                                                                                                                                                                                                                                                                                                                                                                                                                                                                                                                                                                                                                                                                                                                                                                                                                                                                                                                                                                                                                                                                                                                                                                                                                                                                                                                                                                                                                                                                                                                                                                                                                                                                                                                                                                                                                                                                                                                                                                                                                                                                                                                                                                                                                                                                                                                                                                                                                                                                                                                                                                                                                                                                                                                                                                                                                                                                                                                                                                                                                                                                                                                                                                                                                                                                                                                                                                                                                                                                                                                                                                                                                                                                                                                                                                                                                                                                                                                                                                                                                                                                                                                                                                                                                                                                                                                                                                                                                                                                                                                                                                                                                                                                                                                                                                                                                     | 16415329 | 0.045165       | Polysaccharide                 | taxonomic annotation available                    |              |
| 151302_20 | Carbohydrate metabolism                             | Pyruvate metabolism                                                       | ATP-dependent helixase HspA                                                                                                                                                                                                                                                                                                                                                                                                                                                                                                                                                                                                                                                                                                                                                                                                                                                                                                                                                                                                                                                                                                                                                                                                                                                                                                                                                                                                                                                                                                                                                                                                                                                                                                                                                                                                                                                                                                                                                                                                                                                                                                                                                                                                                                                                                                                                                                                                                                                                                                                                                                                                                                                                                                                                                                                                                                                                                                                                                                                                                                                                                                                                                                                                                                                                                                                                                                                                                                                                                                                                                                                                                                                                                                                                                                                                                                                                                                                                                                                                                                                                                                                                                                                                                                                                                                                                                                                                                                                                                                                                                                                                                                                                                                                                                                                                                                                                                                                                                                                                                                                                                                                                                                                                                                                                                                                                                                                                                                                                                                                                                                                                                                                                                                                                                                                                                                                                                                                                                                                                                                                                                                                                                                                                                                                                                                                                                                                                                                                                                                                                                                                                                                                                                                                                                                                                                                                                                                                                                                                                                                                                                                                                                                                                                                                                                                                                                                                                                                                                                                                                                                                                                                                                                                                                                                                                                                                                                                                                                                                                                                                                                   | 16311864 | 0.002840       | Polysaccharide                 | taxonomic annotation available                    |              |
| 97448_3   | Signal transduction                                 | Taxis                                                                     | HspA protein                                                                                                                                                                                                                                                                                                                                                                                                                                                                                                                                                                                                                                                                                                                                                                                                                                                                                                                                                                                                                                                                                                                                                                                                                                                                                                                                                                                                                                                                                                                                                                                                                                                                                                                                                                                                                                                                                                                                                                                                                                                                                                                                                                                                                                                                                                                                                                                                                                                                                                                                                                                                                                                                                                                                                                                                                                                                                                                                                                                                                                                                                                                                                                                                                                                                                                                                                                                                                                                                                                                                                                                                                                                                                                                                                                                                                                                                                                                                                                                                                                                                                                                                                                                                                                                                                                                                                                                                                                                                                                                                                                                                                                                                                                                                                                                                                                                                                                                                                                                                                                                                                                                                                                                                                                                                                                                                                                                                                                                                                                                                                                                                                                                                                                                                                                                                                                                                                                                                                                                                                                                                                                                                                                                                                                                                                                                                                                                                                                                                                                                                                                                                                                                                                                                                                                                                                                                                                                                                                                                                                                                                                                                                                                                                                                                                                                                                                                                                                                                                                                                                                                                                                                                                                                                                                                                                                                                                                                                                                                                                                                                                                                  | 16251571 | 0.024903       | Polysaccharide                 | Proteobacterium: Gammaproteobacteria: Pseudomonas | Pseudomonas  |
| 150127_1  | No roles mapped out of 4 KOs                        | Chemotaxis proteins                                                       | Chemotaxis proteins                                                                                                                                                                                                                                                                                                                                                                                                                                                                                                                                                                                                                                                                                                                                                                                                                                                                                                                                                                                                                                                                                                                                                                                                                                                                                                                                                                                                                                                                                                                                                                                                                                                                                                                                                                                                                                                                                                                                                                                                                                                                                                                                                                                                                                                                                                                                                                                                                                                                                                                                                                                                                                                                                                                                                                                                                                                                                                                                                                                                                                                                                                                                                                                                                                                                                                                                                                                                                                                                                                                                                                                                                                                                                                                                                                                                                                                                                                                                                                                                                                                                                                                                                                                                                                                                                                                                                                                                                                                                                                                                                                                                                                                                                                                                                                                                                                                                                                                                                                                                                                                                                                                                                                                                                                                                                                                                                                                                                                                                                                                                                                                                                                                                                                                                                                                                                                                                                                                                                                                                                                                                                                                                                                                                                                                                                                                                                                                                                                                                                                                                                                                                                                                                                                                                                                                                                                                                                                                                                                                                                                                                                                                                                                                                                                                                                                                                                                                                                                                                                                                                                                                                                                                                                                                                                                                                                                                                                                                                                                                                                                                                                           | 16156448 | 0.021405       | Polysaccharide                 | Proteobacterium: Gammaproteobacteria: Pseudomonas | Pseudomonas  |
| 150127_1  | No roles mapped out of 4 KOs                        | Prosthetic group, cofactors, and carriers                                 | Prosthetic group, cofactors, and carriers                                                                                                                                                                                                                                                                                                                                                                                                                                                                                                                                                                                                                                                                                                                                                                                                                                                                                                                                                                                                                                                                                                                                                                                                                                                                                                                                                                                                                                                                                                                                                                                                                                                                                                                                                                                                                                                                                                                                                                                                                                                                                                                                                                                                                                                                                                                                                                                                                                                                                                                                                                                                                                                                                                                                                                                                                                                                                                                                                                                                                                                                                                                                                                                                                                                                                                                                                                                                                                                                                                                                                                                                                                                                                                                                                                                                                                                                                                                                                                                                                                                                                                                                                                                                                                                                                                                                                                                                                                                                                                                                                                                                                                                                                                                                                                                                                                                                                                                                                                                                                                                                                                                                                                                                                                                                                                                                                                                                                                                                                                                                                                                                                                                                                                                                                                                                                                                                                                                                                                                                                                                                                                                                                                                                                                                                                                                                                                                                                                                                                                                                                                                                                                                                                                                                                                                                                                                                                                                                                                                                                                                                                                                                                                                                                                                                                                                                                                                                                                                                                                                                                                                                                                                                                                                                                                                                                                                                                                                                                                                                                                                                     | 16152389 | 0.004387       | Polysaccharide                 | taxonomic annotation available                    |              |
| 150127_1  | No roles mapped out of 4 KOs                        | Carboxylate metabolism                                                    | D-carboxylate-acyl coenzyme D                                                                                                                                                                                                                                                                                                                                                                                                                                                                                                                                                                                                                                                                                                                                                                                                                                                                                                                                                                                                                                                                                                                                                                                                                                                                                                                                                                                                                                                                                                                                                                                                                                                                                                                                                                                                                                                                                                                                                                                                                                                                                                                                                                                                                                                                                                                                                                                                                                                                                                                                                                                                                                                                                                                                                                                                                                                                                                                                                                                                                                                                                                                                                                                                                                                                                                                                                                                                                                                                                                                                                                                                                                                                                                                                                                                                                                                                                                                                                                                                                                                                                                                                                                                                                                                                                                                                                                                                                                                                                                                                                                                                                                                                                                                                                                                                                                                                                                                                                                                                                                                                                                                                                                                                                                                                                                                                                                                                                                                                                                                                                                                                                                                                                                                                                                                                                                                                                                                                                                                                                                                                                                                                                                                                                                                                                                                                                                                                                                                                                                                                                                                                                                                                                                                                                                                                                                                                                                                                                                                                                                                                                                                                                                                                                                                                                                                                                                                                                                                                                                                                                                                                                                                                                                                                                                                                                                                                                                                                                                                                                                                                                 | 16156305 | 0.002447       | Polysaccharide                 | Proteobacterium: Gammaproteobacteria: Pseudomonas | Pseudomonas  |
| 150127_1  | No roles mapped out of 4 KOs                        | Oxidoreductase, zinc-binding protein                                      | Oxidoreductase, zinc-binding protein                                                                                                                                                                                                                                                                                                                                                                                                                                                                                                                                                                                                                                                                                                                                                                                                                                                                                                                                                                                                                                                                                                                                                                                                                                                                                                                                                                                                                                                                                                                                                                                                                                                                                                                                                                                                                                                                                                                                                                                                                                                                                                                                                                                                                                                                                                                                                                                                                                                                                                                                                                                                                                                                                                                                                                                                                                                                                                                                                                                                                                                                                                                                                                                                                                                                                                                                                                                                                                                                                                                                                                                                                                                                                                                                                                                                                                                                                                                                                                                                                                                                                                                                                                                                                                                                                                                                                                                                                                                                                                                                                                                                                                                                                                                                                                                                                                                                                                                                                                                                                                                                                                                                                                                                                                                                                                                                                                                                                                                                                                                                                                                                                                                                                                                                                                                                                                                                                                                                                                                                                                                                                                                                                                                                                                                                                                                                                                                                                                                                                                                                                                                                                                                                                                                                                                                                                                                                                                                                                                                                                                                                                                                                                                                                                                                                                                                                                                                                                                                                                                                                                                                                                                                                                                                                                                                                                                                                                                                                                                                                                                                                          | 16151817 | 0.018902       | Polysaccharide                 | Proteobacterium: Gammaproteobacteria: Pseudomonas | Pseudomonas  |
| 42815_4   | Amino acid metabolism                               | Citric acid cycle                                                         | Malic enzyme 1-phosphatase isoenzyme                                                                                                                                                                                                                                                                                                                                                                                                                                                                                                                                                                                                                                                                                                                                                                                                                                                                                                                                                                                                                                                                                                                                                                                                                                                                                                                                                                                                                                                                                                                                                                                                                                                                                                                                                                                                                                                                                                                                                                                                                                                                                                                                                                                                                                                                                                                                                                                                                                                                                                                                                                                                                                                                                                                                                                                                                                                                                                                                                                                                                                                                                                                                                                                                                                                                                                                                                                                                                                                                                                                                                                                                                                                                                                                                                                                                                                                                                                                                                                                                                                                                                                                                                                                                                                                                                                                                                                                                                                                                                                                                                                                                                                                                                                                                                                                                                                                                                                                                                                                                                                                                                                                                                                                                                                                                                                                                                                                                                                                                                                                                                                                                                                                                                                                                                                                                                                                                                                                                                                                                                                                                                                                                                                                                                                                                                                                                                                                                                                                                                                                                                                                                                                                                                                                                                                                                                                                                                                                                                                                                                                                                                                                                                                                                                                                                                                                                                                                                                                                                                                                                                                                                                                                                                                                                                                                                                                                                                                                                                                                                                                                                          | 16143478 | 0.048094       | Polysaccharide                 | Proteobacterium: Gammaproteobacteria: Pseudomonas | Pseudomonas  |
| 116564_2  | Signal transduction                                 | General                                                                   | KaC                                                                                                                                                                                                                                                                                                                                                                                                                                                                                                                                                                                                                                                                                                                                                                                                                                                                                                                                                                                                                                                                                                                                                                                                                                                                                                                                                                                                                                                                                                                                                                                                                                                                                                                                                                                                                                                                                                                                                                                                                                                                                                                                                                                                                                                                                                                                                                                                                                                                                                                                                                                                                                                                                                                                                                                                                                                                                                                                                                                                                                                                                                                                                                                                                                                                                                                                                                                                                                                                                                                                                                                                                                                                                                                                                                                                                                                                                                                                                                                                                                                                                                                                                                                                                                                                                                                                                                                                                                                                                                                                                                                                                                                                                                                                                                                                                                                                                                                                                                                                                                                                                                                                                                                                                                                                                                                                                                                                                                                                                                                                                                                                                                                                                                                                                                                                                                                                                                                                                                                                                                                                                                                                                                                                                                                                                                                                                                                                                                                                                                                                                                                                                                                                                                                                                                                                                                                                                                                                                                                                                                                                                                                                                                                                                                                                                                                                                                                                                                                                                                                                                                                                                                                                                                                                                                                                                                                                                                                                                                                                                                                                                                           | 16143478 | 0.048094       | Polysaccharide                 | Proteobacterium: Gammaproteobacteria: Pseudomonas | Pseudomonas  |
| 823384_3  | Energy metabolism                                   | General                                                                   | 1,5-dioxynucleoside                                                                                                                                                                                                                                                                                                                                                                                                                                                                                                                                                                                                                                                                                                                                                                                                                                                                                                                                                                                                                                                                                                                                                                                                                                                                                                                                                                                                                                                                                                                                                                                                                                                                                                                                                                                                                                                                                                                                                                                                                                                                                                                                                                                                                                                                                                                                                                                                                                                                                                                                                                                                                                                                                                                                                                                                                                                                                                                                                                                                                                                                                                                                                                                                                                                                                                                                                                                                                                                                                                                                                                                                                                                                                                                                                                                                                                                                                                                                                                                                                                                                                                                                                                                                                                                                                                                                                                                                                                                                                                                                                                                                                                                                                                                                                                                                                                                                                                                                                                                                                                                                                                                                                                                                                                                                                                                                                                                                                                                                                                                                                                                                                                                                                                                                                                                                                                                                                                                                                                                                                                                                                                                                                                                                                                                                                                                                                                                                                                                                                                                                                                                                                                                                                                                                                                                                                                                                                                                                                                                                                                                                                                                                                                                                                                                                                                                                                                                                                                                                                                                                                                                                                                                                                                                                                                                                                                                                                                                                                                                                                                                                                           | 16143478 | 0.048094       | Polysaccharide                 | Proteobacterium: Gammaproteobacteria: Pseudomonas | Pseudomonas  |
| 104022_9  | Carbohydrate metabolism                             | Amino sugar and nucleotide sugar metabolism                               | beta-D-glucosyl-2-epimerase                                                                                                                                                                                                                                                                                                                                                                                                                                                                                                                                                                                                                                                                                                                                                                                                                                                                                                                                                                                                                                                                                                                                                                                                                                                                                                                                                                                                                                                                                                                                                                                                                                                                                                                                                                                                                                                                                                                                                                                                                                                                                                                                                                                                                                                                                                                                                                                                                                                                                                                                                                                                                                                                                                                                                                                                                                                                                                                                                                                                                                                                                                                                                                                                                                                                                                                                                                                                                                                                                                                                                                                                                                                                                                                                                                                                                                                                                                                                                                                                                                                                                                                                                                                                                                                                                                                                                                                                                                                                                                                                                                                                                                                                                                                                                                                                                                                                                                                                                                                                                                                                                                                                                                                                                                                                                                                                                                                                                                                                                                                                                                                                                                                                                                                                                                                                                                                                                                                                                                                                                                                                                                                                                                                                                                                                                                                                                                                                                                                                                                                                                                                                                                                                                                                                                                                                                                                                                                                                                                                                                                                                                                                                                                                                                                                                                                                                                                                                                                                                                                                                                                                                                                                                                                                                                                                                                                                                                                                                                                                                                                                                                   | 15299352 | 0.008862       | Polysaccharide                 | taxonomic annotation available                    |              |
| 156269_5  | Transport and binding proteins                      | Amino acids, peptides and amines                                          | Alginate biosynthesis protein AlgA                                                                                                                                                                                                                                                                                                                                                                                                                                                                                                                                                                                                                                                                                                                                                                                                                                                                                                                                                                                                                                                                                                                                                                                                                                                                                                                                                                                                                                                                                                                                                                                                                                                                                                                                                                                                                                                                                                                                                                                                                                                                                                                                                                                                                                                                                                                                                                                                                                                                                                                                                                                                                                                                                                                                                                                                                                                                                                                                                                                                                                                                                                                                                                                                                                                                                                                                                                                                                                                                                                                                                                                                                                                                                                                                                                                                                                                                                                                                                                                                                                                                                                                                                                                                                                                                                                                                                                                                                                                                                                                                                                                                                                                                                                                                                                                                                                                                                                                                                                                                                                                                                                                                                                                                                                                                                                                                                                                                                                                                                                                                                                                                                                                                                                                                                                                                                                                                                                                                                                                                                                                                                                                                                                                                                                                                                                                                                                                                                                                                                                                                                                                                                                                                                                                                                                                                                                                                                                                                                                                                                                                                                                                                                                                                                                                                                                                                                                                                                                                                                                                                                                                                                                                                                                                                                                                                                                                                                                                                                                                                                                                                            | 15210205 | 0.003813       | Polysaccharide                 | taxonomic annotation available                    |              |
| 183428_5  | Transport and binding proteins                      | Cationic and non-cationic proteases                                       | YnfH YnfJ YnfK YnfL YnfM YnfN YnfO YnfP YnfQ YnfR YnfS YnfT YnfU YnfV YnfW YnfX YnfY YnfZ Ynf1 Ynf2 Ynf3 Ynf4 Ynf5 Ynf6 Ynf7 Ynf8 Ynf9 Ynf10 Ynf11 Ynf12 Ynf13 Ynf14 Ynf15 Ynf16 Ynf17 Ynf18 Ynf19 Ynf20 Ynf21 Ynf22 Ynf23 Ynf24 Ynf25 Ynf26 Ynf27 Ynf28 Ynf29 Ynf30 Ynf31 Ynf32 Ynf33 Ynf34 Ynf35 Ynf36 Ynf37 Ynf38 Ynf39 Ynf40 Ynf41 Ynf42 Ynf43 Ynf44 Ynf45 Ynf46 Ynf47 Ynf48 Ynf49 Ynf50 Ynf51 Ynf52 Ynf53 Ynf54 Ynf55 Ynf56 Ynf57 Ynf58 Ynf59 Ynf60 Ynf61 Ynf62 Ynf63 Ynf64 Ynf65 Ynf66 Ynf67 Ynf68 Ynf69 Ynf70 Ynf71 Ynf72 Ynf73 Ynf74 Ynf75 Ynf76 Ynf77 Ynf78 Ynf79 Ynf80 Ynf81 Ynf82 Ynf83 Ynf84 Ynf85 Ynf86 Ynf87 Ynf88 Ynf89 Ynf90 Ynf91 Ynf92 Ynf93 Ynf94 Ynf95 Ynf96 Ynf97 Ynf98 Ynf99 Ynf100 Ynf101 Ynf102 Ynf103 Ynf104 Ynf105 Ynf106 Ynf107 Ynf108 Ynf109 Ynf110 Ynf111 Ynf112 Ynf113 Ynf114 Ynf115 Ynf116 Ynf117 Ynf118 Ynf119 Ynf120 Ynf121 Ynf122 Ynf123 Ynf124 Ynf125 Ynf126 Ynf127 Ynf128 Ynf129 Ynf130 Ynf131 Ynf132 Ynf133 Ynf134 Ynf135 Ynf136 Ynf137 Ynf138 Ynf139 Ynf140 Ynf141 Ynf142 Ynf143 Ynf144 Ynf145 Ynf146 Ynf147 Ynf148 Ynf149 Ynf150 Ynf151 Ynf152 Ynf153 Ynf154 Ynf155 Ynf156 Ynf157 Ynf158 Ynf159 Ynf160 Ynf161 Ynf162 Ynf163 Ynf164 Ynf165 Ynf166 Ynf167 Ynf168 Ynf169 Ynf170 Ynf171 Ynf172 Ynf173 Ynf174 Ynf175 Ynf176 Ynf177 Ynf178 Ynf179 Ynf180 Ynf181 Ynf182 Ynf183 Ynf184 Ynf185 Ynf186 Ynf187 Ynf188 Ynf189 Ynf190 Ynf191 Ynf192 Ynf193 Ynf194 Ynf195 Ynf196 Ynf197 Ynf198 Ynf199 Ynf200 Ynf201 Ynf202 Ynf203 Ynf204 Ynf205 Ynf206 Ynf207 Ynf208 Ynf209 Ynf210 Ynf211 Ynf212 Ynf213 Ynf214 Ynf215 Ynf216 Ynf217 Ynf218 Ynf219 Ynf220 Ynf221 Ynf222 Ynf223 Ynf224 Ynf225 Ynf226 Ynf227 Ynf228 Ynf229 Ynf230 Ynf231 Ynf232 Ynf233 Ynf234 Ynf235 Ynf236 Ynf237 Ynf238 Ynf239 Ynf240 Ynf241 Ynf242 Ynf243 Ynf244 Ynf245 Ynf246 Ynf247 Ynf248 Ynf249 Ynf250 Ynf251 Ynf252 Ynf253 Ynf254 Ynf255 Ynf256 Ynf257 Ynf258 Ynf259 Ynf260 Ynf261 Ynf262 Ynf263 Ynf264 Ynf265 Ynf266 Ynf267 Ynf268 Ynf269 Ynf270 Ynf271 Ynf272 Ynf273 Ynf274 Ynf275 Ynf276 Ynf277 Ynf278 Ynf279 Ynf280 Ynf281 Ynf282 Ynf283 Ynf284 Ynf285 Ynf286 Ynf287 Ynf288 Ynf289 Ynf290 Ynf291 Ynf292 Ynf293 Ynf294 Ynf295 Ynf296 Ynf297 Ynf298 Ynf299 Ynf300 Ynf301 Ynf302 Ynf303 Ynf304 Ynf305 Ynf306 Ynf307 Ynf308 Ynf309 Ynf310 Ynf311 Ynf312 Ynf313 Ynf314 Ynf315 Ynf316 Ynf317 Ynf318 Ynf319 Ynf320 Ynf321 Ynf322 Ynf323 Ynf324 Ynf325 Ynf326 Ynf327 Ynf328 Ynf329 Ynf330 Ynf331 Ynf332 Ynf333 Ynf334 Ynf335 Ynf336 Ynf337 Ynf338 Ynf339 Ynf340 Ynf341 Ynf342 Ynf343 Ynf344 Ynf345 Ynf346 Ynf347 Ynf348 Ynf349 Ynf350 Ynf351 Ynf352 Ynf353 Ynf354 Ynf355 Ynf356 Ynf357 Ynf358 Ynf359 Ynf360 Ynf361 Ynf362 Ynf363 Ynf364 Ynf365 Ynf366 Ynf367 Ynf368 Ynf369 Ynf370 Ynf371 Ynf372 Ynf373 Ynf374 Ynf375 Ynf376 Ynf377 Ynf378 Ynf379 Ynf380 Ynf381 Ynf382 Ynf383 Ynf384 Ynf385 Ynf386 Ynf387 Ynf388 Ynf389 Ynf390 Ynf391 Ynf392 Ynf393 Ynf394 Ynf395 Ynf396 Ynf397 Ynf398 Ynf399 Ynf400 Ynf401 Ynf402 Ynf403 Ynf404 Ynf405 Ynf406 Ynf407 Ynf408 Ynf409 Ynf410 Ynf411 Ynf412 Ynf413 Ynf414 Ynf415 Ynf416 Ynf417 Ynf418 Ynf419 Ynf420 Ynf421 Ynf422 Ynf423 Ynf424 Ynf425 Ynf426 Ynf427 Ynf428 Ynf429 Ynf430 Ynf431 Ynf432 Ynf433 Ynf434 Ynf435 Ynf436 Ynf437 Ynf438 Ynf439 Ynf440 Ynf441 Ynf442 Ynf443 Ynf444 Ynf445 Ynf446 Ynf447 Ynf448 Ynf449 Ynf450 Ynf451 Ynf452 Ynf453 Ynf454 Ynf455 Ynf456 Ynf457 Ynf458 Ynf459 Ynf460 Ynf461 Ynf462 Ynf463 Ynf464 Ynf465 Ynf466 Ynf467 Ynf468 Ynf469 Ynf470 Ynf471 Ynf472 Ynf473 Ynf474 Ynf475 Ynf476 Ynf477 Ynf478 Ynf479 Ynf480 Ynf481 Ynf482 Ynf483 Ynf484 Ynf485 Ynf486 Ynf487 Ynf488 Ynf489 Ynf490 Ynf491 Ynf492 Ynf493 Ynf494 Ynf495 Ynf496 Ynf497 Ynf498 Ynf499 Ynf500 Ynf501 Ynf502 Ynf503 Ynf504 Ynf505 Ynf506 Ynf507 Ynf508 Ynf509 Ynf510 Ynf511 Ynf512 Ynf513 Ynf514 Ynf515 Ynf516 Ynf517 Ynf518 Ynf519 Ynf520 Ynf521 Ynf522 Ynf523 Ynf524 Ynf525 Ynf526 Ynf527 Ynf528 Ynf529 Ynf530 Ynf531 Ynf532 Ynf533 Ynf534 Ynf535 Ynf536 Ynf537 Ynf538 Ynf539 Ynf540 Ynf541 Ynf542 Ynf543 Ynf544 Ynf545 Ynf546 Ynf547 Ynf548 Ynf549 Ynf550 Ynf551 Ynf552 Ynf553 Ynf554 Ynf555 Ynf556 Ynf557 Ynf558 Ynf559 Ynf560 Ynf561 Ynf562 Ynf563 Ynf564 Ynf565 Ynf566 Ynf567 Ynf568 Ynf569 Ynf570 Ynf571 Ynf572 Ynf573 Ynf574 Ynf575 Ynf576 Ynf577 Ynf578 Ynf579 Ynf580 Ynf581 Ynf582 Ynf583 Ynf584 Ynf585 Ynf586 Ynf587 Ynf588 Ynf589 Ynf590 Ynf591 Ynf592 Ynf593 Ynf594 Ynf595 Ynf596 Ynf597 Ynf598 Ynf599 Ynf600 Ynf601 Ynf602 Ynf603 Ynf604 Ynf605 Ynf606 Ynf607 Ynf608 Ynf609 Ynf610 Ynf611 Ynf612 Ynf613 Ynf614 Ynf615 Ynf616 Ynf617 Ynf618 Ynf619 Ynf620 Ynf621 Ynf622 Ynf623 Ynf624 Ynf625 Ynf626 Ynf627 Ynf628 Ynf629 Ynf630 Ynf631 Ynf632 Ynf633 Ynf634 Ynf635 Ynf636 Ynf637 Ynf638 Ynf639 Ynf640 Ynf641 Ynf642 Ynf643 Ynf644 Ynf645 Ynf646 Ynf647 Ynf648 Ynf649 Ynf650 Ynf651 Ynf652 Ynf653 Ynf654 Ynf655 Ynf656 Ynf657 Ynf658 Ynf659 Ynf660 Ynf661 Ynf662 Ynf663 Ynf664 Ynf665 Ynf666 Ynf667 Ynf668 Ynf669 Ynf670 Ynf671 Ynf672 Ynf673 Ynf674 Ynf675 Ynf676 Ynf677 Ynf678 Ynf679 Ynf680 Ynf681 Ynf682 Ynf683 Ynf684 Ynf685 Ynf686 Ynf687 Ynf688 Ynf689 Ynf690 Ynf691 Ynf692 Ynf693 Ynf694 Ynf695 Ynf696 Ynf697 Ynf698 Ynf699 Ynf700 Ynf701 Ynf702 Ynf703 Ynf704 Ynf705 Ynf706 Ynf707 Ynf708 Ynf709 Ynf710 Ynf711 Ynf712 Ynf713 Ynf714 Ynf715 Ynf716 Ynf717 Ynf718 Ynf719 Ynf720 Ynf721 Ynf722 Ynf723 Ynf724 Ynf725 Ynf726 Ynf727 Ynf728 Ynf729 Ynf730 Ynf731 Ynf732 Ynf733 Ynf734 Ynf735 Ynf736 Ynf737 Ynf738 Ynf739 Ynf740 Ynf741 Ynf742 Ynf743 Ynf744 Ynf745 Ynf746 Ynf747 Ynf748 Ynf749 Ynf750 Ynf751 Ynf752 Ynf753 Ynf754 Ynf755 Ynf756 Ynf757 Ynf758 Ynf759 Ynf760 Ynf761 Ynf762 Ynf763 Ynf764 Ynf765 Ynf766 Ynf767 Ynf768 Ynf769 Ynf770 Ynf771 Ynf772 Ynf773 Ynf774 Ynf775 Ynf776 Ynf777 Ynf778 Ynf779 Ynf780 Ynf781 Ynf782 Ynf783 Ynf784 Ynf785 Ynf786 Ynf787 Ynf788 Ynf789 Ynf790 Ynf791 Ynf792 Ynf793 Ynf794 Ynf795 Ynf796 Ynf797 Ynf798 Ynf799 Ynf800 Ynf801 Ynf802 Ynf803 Ynf804 Ynf805 Ynf806 Ynf807 Ynf808 Ynf809 Ynf810 Ynf811 Ynf812 Ynf813 Ynf814 Ynf815 Ynf816 Ynf817 Ynf818 Ynf819 Ynf820 Ynf821 Ynf822 Ynf823 Ynf824 Ynf825 Ynf826 Ynf827 Ynf828 Ynf829 Ynf830 Ynf831 Ynf832 Ynf833 Ynf834 Ynf835 Ynf836 Ynf837 Ynf838 Ynf839 Ynf840 Ynf841 Ynf842 Ynf843 Ynf844 Ynf845 Ynf846 Ynf847 Ynf848 Ynf849 Ynf850 Ynf851 Ynf852 Ynf853 Ynf854 Ynf855 Ynf856 Ynf857 Ynf858 Ynf859 Ynf860 Ynf861 Ynf862 Ynf863 Ynf864 Ynf865 Ynf866 Ynf867 Ynf868 Ynf869 Ynf870 Ynf871 Ynf872 Ynf873 Ynf874 Ynf875 Ynf876 Ynf877 Ynf878 Ynf879 Ynf880 Ynf881 Ynf882 Ynf883 Ynf884 Ynf885 Ynf886 Ynf887 Ynf888 Ynf889 Ynf890 Ynf891 Ynf892 Ynf893 Ynf894 Ynf895 Ynf896 Ynf897 Ynf898 Ynf899 Ynf900 Ynf901 Ynf902 Ynf903 Ynf904 Ynf905 Ynf906 Ynf907 Ynf908 Ynf909 Ynf910 Ynf911 Ynf912 Ynf913 Ynf914 Ynf915 Ynf916 Ynf917 Ynf918 Ynf919 Ynf920 Ynf921 Ynf922 Ynf923 Ynf924 Ynf925 Ynf926 Ynf927 Ynf928 Ynf929 Ynf930 Ynf931 Ynf932 Ynf933 Ynf934 Ynf935 Ynf936 Ynf937 Ynf938 Ynf939 Ynf940 Ynf941 Ynf942 Ynf943 Ynf944 Ynf945 Ynf946 Ynf947 Ynf948 Ynf949 Ynf950 Ynf951 Ynf952 Ynf953 Ynf954 Ynf955 Ynf956 Ynf957 Ynf958 Ynf959 Ynf960 Ynf961 Ynf962 Ynf963 Ynf964 Ynf965 Ynf966 Ynf967 Ynf968 Ynf969 Ynf970 Ynf971 Ynf972 Ynf973 Ynf974 Ynf975 Ynf976 Ynf977 Ynf978 Ynf979 Ynf980 Ynf981 Ynf982 Ynf983 Ynf984 Ynf985 Ynf986 Ynf987 Ynf988 Ynf989 Ynf990 Ynf991 Ynf992 Ynf993 Ynf994 Ynf995 Ynf996 Ynf997 Ynf998 Ynf999 Ynf1000 Ynf1001 Ynf1002 Ynf1003 Ynf1004 Ynf1005 Ynf1006 Ynf1007 Ynf1008 Ynf1009 Ynf1010 Ynf1011 Ynf1012 Ynf1013 Ynf1014 Ynf1015 Ynf1016 Ynf1017 Ynf1018 Ynf1019 Ynf1020 Ynf1021 Ynf1022 Ynf1023 Ynf1024 Ynf1025 Ynf1026 Ynf1027 Ynf1028 Ynf1029 Ynf1030 Ynf1031 Ynf1032 Ynf1033 Ynf1034 Ynf1035 Ynf1036 Ynf1037 Ynf1038 Ynf1039 Ynf1040 Ynf1041 Ynf1042 Ynf1043 Ynf1044 Ynf1045 Ynf1046 Ynf1047 Ynf1048 Ynf1049 Ynf1050 Ynf1051 Ynf1052 Ynf1053 Ynf1054 Ynf1055 Ynf1056 Ynf1057 Ynf1058 Ynf1059 Ynf1060 Ynf1061 Ynf1062 Ynf1063 Ynf1064 Ynf1065 Ynf1066 Ynf1067 Ynf1068 Ynf1069 Ynf1070 Ynf1071 Ynf1072 Ynf1073 Ynf1074 Ynf1075 Ynf1076 Ynf1077 Ynf1078 Ynf1079 Ynf1080 Ynf1081 Ynf1082 Ynf1083 Ynf1084 Ynf1085 Ynf1086 Ynf1087 Ynf1088 Ynf1089 Ynf1090 Ynf1091 Ynf1092 Ynf1093 Ynf1094 Ynf1095 Ynf1096 Ynf1097 Ynf1098 Ynf1099 Ynf1100 Ynf110 |          |                |                                |                                                   |              |

|           |                                                     |                                                     |                                                                     |           |          |                                                  |                                                                                    |                                                        |
|-----------|-----------------------------------------------------|-----------------------------------------------------|---------------------------------------------------------------------|-----------|----------|--------------------------------------------------|------------------------------------------------------------------------------------|--------------------------------------------------------|
| 79023.2   | Energy metabolism                                   | Carbon fixation in prokaryotes                      | Biotin carboxylase                                                  | -1.336719 | 0.047254 | Polysaccharide                                   | taxonomic_annotation_available                                                     |                                                        |
| 82092.5   | Transport and binding proteins                      | Cofactor and prosthetic group                       | Neur. exporter protein 8                                            | -1.348834 | 0.056186 | Polysaccharide                                   | taxonomic_annotation_available                                                     |                                                        |
| 105475.2  | Transport and binding proteins                      | Amino acids, peptides and amines                    | RFB domain-containing protein                                       | -1.358983 | 0.011899 | Polysaccharide/Bacteria                          | Proteobacterium/Gammaproteobacteria/Pseudomonas/Pseudomonas                        |                                                        |
| 77623.2   | Carbohydrate metabolism                             | Carbohydrate and glycoconjugate metabolism          | Carbohydrate transferase subunit alpha                              | -1.360547 | 0.018052 | Polysaccharide                                   | taxonomic_annotation_available                                                     |                                                        |
| 79535.2   | Regulatory functions                                | Small molecule interactions                         | Ribonucleic binding ATPase YnfP                                     | -1.364688 | 0.051185 | Polysaccharide/No taxonomic_annotation_available |                                                                                    |                                                        |
| 114899.4  | No roles mapped out of 4 IDs                        |                                                     | Seleconitrin                                                        | -1.362678 | 0.014769 | Polysaccharide/No taxonomic_annotation_available |                                                                                    |                                                        |
| 146098.4  | No roles mapped out of 4 IDs                        | Nonribosomal biodegradation and metabolism          | Hydroxymethylglutaryl reductase                                     | -1.395232 | 0.012482 | Polysaccharide/No taxonomic_annotation_available |                                                                                    |                                                        |
| 134355.2  | No roles mapped out of 4 IDs                        |                                                     | Uncharacterized protein                                             | -1.393977 | 0.045077 | Polysaccharide/No taxonomic_annotation_available |                                                                                    |                                                        |
| 49209.2   | No roles mapped out of 4 IDs                        |                                                     | Uncharacterized protein                                             | -1.393441 | 0.015143 | Polysaccharide/Pseudomonas/Pseudomonas/daede     | Proteobacterium/Gammaproteobacteria/Pseudomonas/Pseudomonas/daede                  |                                                        |
| 114464.2  | No roles mapped out of 4 IDs                        |                                                     | Cytochrome c oxidase accessory protein CooG                         | -1.399308 | 0.024607 | Polysaccharide/Bacteria                          | Proteobacterium/Gammaproteobacteria/Pseudomonas/daede                              |                                                        |
| 131404.3  | Transcription                                       | Ribosomal proteins; synthesis and modification      | 50S ribosomal subunit L3                                            | -1.393441 | 0.015143 | Polysaccharide/Bacteria                          | Proteobacterium/Gammaproteobacteria/Pseudomonas/daede                              | Betaproteobacteria bacterium RF/CF/POW02_12_Full_01_58 |
| 176570.8  | Transcription                                       | RN polymerase                                       | DNA-directed RNA polymerase subunit beta                            | -1.404365 | 0.025078 | Polysaccharide/Bacteria                          | Proteobacterium/Gammaproteobacteria/Pseudomonas/daede                              | Proteobacteria bacterium                               |
| 43409.1   | Carbohydrate metabolism                             | Nucleoside phosphate metabolism                     | Inositol phosphatase (Fragment)                                     | -1.421236 | 0.024874 | Polysaccharide/Bacteria                          | Proteobacterium/Betaproteobacteria/Oxalacetabacterium/Oxalacetabacterium bacterium | Oxalacetabacterium bacterium                           |
| 169183.1  | Fatty acid and lipid metabolism                     | Glycerol and glycerophospholipid metabolism         | Glycerophospholipid diester phosphotransferase                      | -1.412121 | 0.017821 | Polysaccharide/No taxonomic_annotation_available |                                                                                    |                                                        |
| 32188.2   | Translation                                         | Ribosomal proteins; synthesis and modification      | 50S ribosomal protein L5                                            | -1.421236 | 0.011428 | Polysaccharide/Bacteria                          | Proteobacterium/Gammaproteobacteria/Pseudomonas/daede                              | Gammaproteobacteria bacterium                          |
| 113187.5  | Prosthetic groups, cofactors, and carriers          | Carbon and/or nitrogen fixation                     | Formyltransferase/Asparaginase                                      | -1.423632 | 0.012482 | Polysaccharide/No taxonomic_annotation_available |                                                                                    |                                                        |
| 111913.1  | Carbohydrate metabolism                             | Glycolysis / gluconeogenesis                        | Oxydihydroxy-3-phosphoglyceraldehyde                                | -1.437354 | 0.020678 | Polysaccharide/No taxonomic_annotation_available |                                                                                    |                                                        |
| 145719.3  | Energy metabolism                                   | Electron transport                                  | ETF domain-containing protein                                       | -1.447375 | 0.011282 | Polysaccharide/No taxonomic_annotation_available |                                                                                    |                                                        |
| 56668.5   | Intracellular trafficking, assembly, and processing | Chaperone and folding catalysis                     | Ferredoxin-NADP reductase                                           | -1.455847 | 0.012146 | Polysaccharide/No taxonomic_annotation_available |                                                                                    |                                                        |
| 134298.2  | Translation                                         | Ribosomal proteins; synthesis and modification      | 50S ribosomal protein L13                                           | -1.445747 | 0.021754 | Polysaccharide/Bacteria                          | Proteobacterium/Gammaproteobacteria/Pseudomonas/daede                              |                                                        |
| 72546.2   | Prosthetic groups, cofactors, and carriers          | Ubiquitin and other targeted protein modifications  | Ubc1 domain-containing protein                                      | -1.466786 | 0.015103 | Polysaccharide/Bacteria                          | Proteobacterium/Gammaproteobacteria/Pseudomonas/daede                              |                                                        |
| 70374.17  | Intracellular trafficking, assembly, and processing | Chaperone and folding catalysis                     | Bacterioferritin                                                    | -1.463829 | 0.012426 | Polysaccharide/Bacteria                          | Proteobacterium/Gammaproteobacteria/Pseudomonas/daede                              |                                                        |
| 180186.8  | Intracellular trafficking, assembly, and processing | Chaperone and folding catalysis                     | Thioaldehyde interchange protein                                    | -1.469047 | 0.001676 | Polysaccharide/Bacteria                          | Proteobacterium/Gammaproteobacteria/Pseudomonas/Pseudomonas sp. MF48E3             |                                                        |
| 72461.16  | Intracellular trafficking, assembly, and processing | Proteases                                           | Sho zinc aminopeptidase                                             | -1.479251 | 0.002789 | Polysaccharide/Bacteria                          | Proteobacterium/Gammaproteobacteria/Pseudomonas/daede                              | Proteobacteria bacterium                               |
| 104908.11 | Intracellular trafficking, assembly, and processing | Ribosomal proteins; synthesis and modification      | 30S ribosomal protein S19                                           | -1.504809 | 0.012782 | Polysaccharide/No taxonomic_annotation_available |                                                                                    |                                                        |
| 149077.4  | Transport and binding proteins                      | Unkown substrate                                    | AEC transporter ATP-binding protein                                 | -1.507349 | 0.023042 | Polysaccharide/No taxonomic_annotation_available |                                                                                    |                                                        |
| 84087.2   | Amino acid metabolism                               | Cysteine, serine and threonine metabolism           | Thioamino acid transferase                                          | -1.510485 | 0.002803 | Polysaccharide/No taxonomic_annotation_available |                                                                                    |                                                        |
| 24737.4   | Transport and binding proteins                      | Carbohydrates, organic alcohols, and acids          | beta-D-glucosyltransferase                                          | -1.515749 | 0.002297 | Polysaccharide/Bacteria                          | Proteobacterium/Gammaproteobacteria/Pseudomonas/Pseudomonas                        |                                                        |
| 97447.4   | Translation                                         | Ribosomal proteins; synthesis and modification      | Ribosomal subunit interface protein                                 | -1.523401 | 0.022452 | Polysaccharide/Bacteria                          | Proteobacterium/Gammaproteobacteria/Pseudomonas/daede                              |                                                        |
| 19444.3   | Translation                                         | Ribosomal proteins; synthesis and modification      | Ribosome-binding factor A                                           | -1.525777 | 0.002644 | Polysaccharide/No taxonomic_annotation_available |                                                                                    |                                                        |
| 17053.1   | Regulatory functions                                | Intracellular Trafficking Type Tpx                  | Intracellular Trafficking Type Tpx                                  | -1.531146 | 0.002994 | Polysaccharide/Bacteria                          | Proteobacterium/Gammaproteobacteria/Pseudomonas/Pseudomonas                        | Synidactylocastrum Synidactylocastrum                  |
| 118300.3  | Intracellular trafficking, assembly, and processing | Chaperone and folding catalysis                     | 10S chaperone                                                       | -1.545474 | 0.021981 | Polysaccharide/No taxonomic_annotation_available |                                                                                    |                                                        |
| 82134.1   | No roles mapped out of 4 IDs                        |                                                     | Not in Unifast                                                      | -1.553816 | 0.042701 | Polysaccharide/No taxonomic_annotation_available |                                                                                    |                                                        |
| 61508.1   | Regulatory functions                                | General                                             | Translational GTPase TpxA                                           | -1.564213 | 0.019228 | Polysaccharide/Bacteria                          | Planctomycetes bacterium                                                           | Planctomycetes bacterium                               |
| 61508.2   | Regulatory functions                                | General                                             | Translational GTPase TpxA                                           | -1.564213 | 0.019228 | Polysaccharide/Bacteria                          | Planctomycetes bacterium                                                           | Planctomycetes bacterium                               |
| 68050.5   | Transport and binding proteins                      | Unkown substrate                                    | ATC transporter domain-containing protein                           | -1.581594 | 0.021654 | Polysaccharide/No taxonomic_annotation_available |                                                                                    |                                                        |
| 35713.4   | Transcription                                       | Transcription factors                               | RNA polymerase sigma factor RpoD                                    | -1.582286 | 0.021227 | Polysaccharide/Bacteria                          | Proteobacterium/Betaproteobacteria/Pseudomonas/Pseudomonas                         | Betaproteobacteria bacterium                           |
| 149889.2  | Signal transduction                                 | Signal transduction                                 | Signal-dependent DNA-binding response regulator                     | -1.585873 | 0.017012 | Polysaccharide/No taxonomic_annotation_available |                                                                                    |                                                        |
| 150629.3  | No roles mapped out of 4 IDs                        |                                                     | Purine sugar transport protein                                      | -1.595489 | 0.009275 | Polysaccharide/Bacteria                          | Proteobacterium/Gammaproteobacteria/Pseudomonas/Pseudomonas                        |                                                        |
| 93242.4   | Nucleic acid metabolism                             | DNA degradation                                     | ATP-dependent RNA helicase BsdA                                     | -1.618989 | 0.004707 | Polysaccharide/No taxonomic_annotation_available |                                                                                    |                                                        |
| 107778.12 | No roles mapped out of 4 IDs                        |                                                     | Bacterial regulatory Helix-turn-helix, YnfR family protein          | -1.618989 | 0.011808 | Polysaccharide/No taxonomic_annotation_available |                                                                                    |                                                        |
| 170165.2  | Fatty acid and lipid metabolism                     | Fatty acid degradation                              | 3-ketolactyl-CoA thioesterase                                       | -1.617588 | 0.038742 | Polysaccharide/No taxonomic_annotation_available |                                                                                    |                                                        |
| 182922.4  | Defense and invasion systems                        | Defensin and/or insectivore                         | Methionine                                                          | -1.622696 | 0.020384 | Polysaccharide/No taxonomic_annotation_available |                                                                                    |                                                        |
| 48719.2   | Transport and binding proteins                      | Amino acids, peptides and amines                    | Cytochrome c oxidase subunit I                                      | -1.627472 | 0.025951 | Polysaccharide/No taxonomic_annotation_available |                                                                                    |                                                        |
| 56278.9   | Amino acid metabolism                               | Cysteine, serine and threonine metabolism           | homoserine kinase                                                   | -1.639725 | 0.002147 | Polysaccharide/No taxonomic_annotation_available |                                                                                    |                                                        |
| 113506.9  | Amino acid metabolism                               | Cysteine, serine and threonine metabolism           | 50S ribosomal protein L15                                           | -1.643148 | 0.001970 | Polysaccharide/No taxonomic_annotation_available |                                                                                    |                                                        |
| 42429.3   | Translation                                         | Ribosomal proteins; synthesis and modification      | NS-carbamoylornithinase ribonucleotide mutase                       | -1.646077 | 0.027039 | Polysaccharide/No taxonomic_annotation_available |                                                                                    |                                                        |
| 45404.3   | Nucleic acid metabolism                             | Purine metabolism                                   | Cytosine methyltransferase                                          | -1.646077 | 0.027039 | Polysaccharide/No taxonomic_annotation_available |                                                                                    |                                                        |
| 145719.3  | Intracellular trafficking, assembly, and processing | Protein export, secretion, and sorting              | NS-carbamoylornithinase ribonucleotide mutase                       | -1.646077 | 0.027039 | Polysaccharide/No taxonomic_annotation_available |                                                                                    |                                                        |
| 31849.8   | No roles mapped out of 4 IDs                        |                                                     | 60S chaperone                                                       | -1.663724 | 0.029932 | Polysaccharide/Bacteria                          | Proteobacterium/Gammaproteobacteria/Pseudomonas/daede                              | Betaproteobacteria bacterium RF/CF/POW02_12_Full_08_20 |
| 175116.1  | Fatty acid and lipid metabolism                     | Chaperone and folding catalysis                     | Fatty acid oxidation complex subunit alpha                          | -1.668812 | 0.017682 | Polysaccharide/No taxonomic_annotation_available |                                                                                    |                                                        |
| 77023.10  | No roles mapped out of 4 IDs                        |                                                     | TraM domain-containing protein                                      | -1.696917 | 0.009146 | Polysaccharide/Bacteria                          | Proteobacterium/Gammaproteobacteria/Pseudomonas/daede                              |                                                        |
| 82700.4   | Intracellular trafficking, assembly, and processing | Proteases                                           | Oxyphosphatase                                                      | -1.705555 | 0.013881 | Polysaccharide/No taxonomic_annotation_available |                                                                                    |                                                        |
| 77182.2   | Carbohydrate metabolism                             | Butanediol metabolism                               | 3-hydroxyacyl-CoA thioesterase                                      | -1.709892 | 0.032745 | Polysaccharide/Bacteria                          | Proteobacterium/Gammaproteobacteria/Pseudomonas/daede                              |                                                        |
| 109629.3  | No roles mapped out of 4 IDs                        |                                                     | Uncharacterized protein                                             | -1.713778 | 0.004024 | Polysaccharide/No taxonomic_annotation_available |                                                                                    |                                                        |
| 80705.2   | Intracellular trafficking, assembly, and processing | Proteases                                           | Oxyphosphatase                                                      | -1.732725 | 0.009365 | Polysaccharide/No taxonomic_annotation_available |                                                                                    |                                                        |
| 139837.9  | Carbohydrate metabolism                             | Protein phosphate pathway                           | Ribulose-phosphate 3-epimerase                                      | -1.738719 | 0.021454 | Polysaccharide/Bacteria                          | Proteobacterium/Gammaproteobacteria/Pseudomonas/Pseudomonas                        | compost metagenome                                     |
| 144711.1  | Intracellular trafficking, assembly, and processing | Chaperone and folding catalysis                     | Chaperone ATP-binding protein                                       | -1.738719 | 0.021454 | Polysaccharide/Bacteria                          | Proteobacterium/Gammaproteobacteria/Pseudomonas/Pseudomonas                        |                                                        |
| 118693.8  | Transport and binding proteins                      | Carbohydrates, organic alcohols, and acids          | Glucose ABC transporter, ATP-binding subunit                        | -1.745206 | 0.049263 | Polysaccharide/No taxonomic_annotation_available |                                                                                    |                                                        |
| 102738.23 | No roles mapped out of 4 IDs                        |                                                     | Uncharacterized protein                                             | -1.752409 | 0.025942 | Polysaccharide/No taxonomic_annotation_available |                                                                                    |                                                        |
| 51741.5   | No roles mapped out of 4 IDs                        |                                                     | Uncharacterized protein                                             | -1.764784 | 0.002188 | Polysaccharide/No taxonomic_annotation_available |                                                                                    |                                                        |
| 24744.8   | No roles mapped out of 4 IDs                        |                                                     | Two component transcriptional regulator, winged helix family member | -1.767815 | 0.002793 | Polysaccharide/Bacteria                          | Proteobacterium/Gammaproteobacteria/Pseudomonas/Pseudomonas                        | compost metagenome                                     |
| 170296.1  | Transport and binding proteins                      | Transport and binding proteins                      | Zinc-dependent carboxylase large subunit                            | -1.778077 | 0.016061 | Polysaccharide/Bacteria                          | Proteobacterium/Gammaproteobacteria/Pseudomonas/Pseudomonas                        |                                                        |
| 49338.3   | Carbohydrate metabolism                             | Biopolymer metabolism                               | 2-Oxyglutarate carboxylase large subunit                            | -1.790818 | 9.26E-05 | Polysaccharide/No taxonomic_annotation_available |                                                                                    |                                                        |
| 60900.1   | Translation                                         | Ribosomal proteins; synthesis and modification      | 50S ribosomal protein S17                                           | -1.797173 | 0.017144 | Polysaccharide/No taxonomic_annotation_available |                                                                                    |                                                        |
| 170287.2  | Energy metabolism                                   | Oxidative phosphorylation                           | Cytochrome c oxidase subunit 1 homolog, bacteroid                   | -1.811236 | 0.002002 | Polysaccharide/No taxonomic_annotation_available |                                                                                    |                                                        |
| 162411.1  | Intracellular trafficking, assembly, and processing | Ribosomal proteins; synthesis and modification      | 60S chaperone                                                       | -1.821873 | 0.014857 | Polysaccharide/No taxonomic_annotation_available |                                                                                    |                                                        |
| 121610.10 | Nucleic acid metabolism                             | Purine metabolism                                   | Carbamate kinase                                                    | -1.844406 | 0.022874 | Polysaccharide/No taxonomic_annotation_available |                                                                                    |                                                        |
| 30466.3   | Amino acid metabolism                               | Arginine and proline metabolism                     | Pyridoxal-5-carboxylate reductase                                   | -1.838715 | 0.001444 | Polysaccharide/Bacteria                          | Proteobacterium/Gammaproteobacteria/Pseudomonas/daede                              |                                                        |
| 79145.1   | Intracellular trafficking, assembly, and processing | Protein modification and repair                     | Protein deformylase                                                 | -1.868165 | 0.011282 | Polysaccharide/Bacteria                          | Proteobacterium/Gammaproteobacteria/Pseudomonas/daede                              |                                                        |
| 109447.17 | Intracellular trafficking, assembly, and processing | Chaperone and folding catalysis                     | 10S chaperone                                                       | -1.871718 | 0.011282 | Polysaccharide/Bacteria                          | Proteobacterium/Gammaproteobacteria/Pseudomonas/Pseudomonas                        |                                                        |
| 100161.4  | No roles mapped out of 4 IDs                        |                                                     | Phage terminase, small subunit                                      | -1.878812 | 0.011102 | Polysaccharide/No taxonomic_annotation_available |                                                                                    |                                                        |
| 140594.3  | Carbohydrate metabolism                             | Citrate cycle (TCA cycle)                           | Citrate synthase                                                    | -1.879813 | 0.032313 | Polysaccharide/Bacteria                          | Proteobacterium/Alphaproteobacteria/Sphingomonas/Erythrobacter/Croceosulfon        |                                                        |
| 180937.2  | Nonribosomal biodegradation and metabolism          | Nonribosomal biodegradation and metabolism          | NS-carbamoylornithinase ribonucleotide mutase                       | -1.894149 | 0.002033 | Polysaccharide/Bacteria                          | Proteobacterium/Betaproteobacteria/Pseudomonas/daede                               |                                                        |
| 56217.8   | Intracellular trafficking, assembly, and processing | Proteases                                           | Lon protease                                                        | -1.903516 | 0.019344 | Polysaccharide/No taxonomic_annotation_available |                                                                                    |                                                        |
| 134362.1  | Regulatory functions                                | Small molecule interactions                         | Histidine kinase (Fragment)                                         | -1.924077 | 0.003074 | Polysaccharide/Bacteria                          | Proteobacterium/Gammaproteobacteria/Pseudomonas/Pseudomonas sp. HMW931             |                                                        |
| 102158.2  | Nonribosomal biodegradation and metabolism          | Ribonucleic acid degradation                        | Ferredoxin-NADP reductase                                           | -1.938666 | 0.016566 | Polysaccharide/No taxonomic_annotation_available |                                                                                    |                                                        |
| 169888.5  | Intracellular trafficking, assembly, and processing | Proteins and protein interactions                   | Carboxylphosphoryl-in-oxidase                                       | -1.940811 | 0.001726 | Polysaccharide/Bacteria                          | Proteobacterium/Gammaproteobacteria/Pseudomonas/Pseudomonas/daede                  |                                                        |
| 109447.17 | Intracellular trafficking, assembly, and processing | Chaperone and folding catalysis                     | Protein GroEL                                                       | -1.951437 | 0.001726 | Polysaccharide/No taxonomic_annotation_available |                                                                                    |                                                        |
| 118799.1  | Energy metabolism                                   | Oxidative phosphorylation                           | NADH-quinone oxidoreductase subunit F                               | -1.954998 | 0.035527 | Polysaccharide/Bacteria                          | Actinobacteria/Thermoplasma/Solirubrobacterales                                    | Solirubrobacterales bacterium 67-14                    |
| 102738.23 | Intracellular trafficking, assembly, and processing | Defensin and/or insectivore                         | Proteinase inhibitor                                                | -1.951437 | 0.001726 | Polysaccharide/No taxonomic_annotation_available |                                                                                    |                                                        |
| 1288.6    | Defense and invasion systems                        | Defensin and/or insectivore                         | Allyl hydroperoxide reductase subunit B                             | -1.958465 | 0.035863 | Polysaccharide/No taxonomic_annotation_available |                                                                                    |                                                        |
| 680270.8  | Energy metabolism                                   | Sulfur metabolism                                   | Sulfite adenylyltransferase subunit 2                               | -1.959854 | 0.020390 | Polysaccharide/No taxonomic_annotation_available |                                                                                    |                                                        |
| 102158.2  | Energy metabolism                                   | Oxidative phosphorylation                           | Cytochrome c oxidase, hcb-type, subunit 4                           | -1.960294 | 0.012615 | Polysaccharide/Bacteria                          | Proteobacterium/Gammaproteobacteria/Pseudomonas/Pseudomonas                        |                                                        |
| 149447.17 | Amino acid metabolism                               | Phenylalanine, tyrosine and tryptophan biosynthesis | Sulfhydryltransferase beta chain                                    | -1.961848 | 0.000743 | Polysaccharide/No taxonomic_annotation_available |                                                                                    |                                                        |
| 56217.8   | Intracellular trafficking, assembly, and processing | Proteases                                           | Lon protease                                                        | -1.970759 | 2.14E-07 | Polysaccharide/No taxonomic_annotation_available |                                                                                    |                                                        |
| 60112.6   | Regulatory functions                                | D interactions                                      | Proteinase inhibitor                                                | -1.972074 | 0.001897 | Polysaccharide/Bacteria                          | Proteobacterium/Gammaproteobacteria/Pseudomonas/Pseudomonas sp. ES3-13             |                                                        |
| 144610.13 | No roles mapped out of 4 IDs                        |                                                     | Phage                                                               | -1.992903 | 0.007801 | Polysaccharide/No taxonomic_annotation_available |                                                                                    |                                                        |
| 1128603.1 | Transport and binding proteins                      | Carbohydrates, organic alcohols, and acids          | AEC transmembrane type-1 domain-containing protein                  | -1.950206 | 0.044077 | Polysaccharide/No taxonomic_annotation_available |                                                                                    |                                                        |
| 144134.1  | No roles mapped out of 4 IDs                        |                                                     | Uncharacterized protein                                             | -1.983136 | 0.021805 | Polysaccharide/Bacteria                          | Bacteroidetes bacterium                                                            | Bacteroidetes bacterium                                |
| 90462.1   | Transport and binding proteins                      | Protein and protein interactions                    | Tooth-dependent copper receptor                                     | -1.984478 | 0.025160 | Polysaccharide/Bacteria                          | Proteobacterium/Gammaproteobacteria/Pseudomonas/daede                              |                                                        |
| 39781.6   | Intracellular trafficking, assembly, and processing | Chaperone and folding catalysis                     | Chaperone protein Hsp60                                             | -1.920907 | 0.009262 | Polysaccharide/No taxonomic_annotation_available |                                                                                    |                                                        |
| 1288.6    | Defense and invasion systems                        | Defensin and/or insectivore                         | Allyl hydroperoxide reductase E                                     | -1.123538 | 0.019613 | Polysaccharide/No taxonomic_annotation_available |                                                                                    |                                                        |
| 42936.1   | No roles mapped out of 4 IDs                        |                                                     | Uncharacterized protein                                             | -1.123538 | 0.019613 | Polysaccharide/No taxonomic_annotation_available |                                                                                    |                                                        |
| 71857.3   | Intracellular trafficking, assembly, and processing | Chaperone and folding catalysis                     | Chaperone protein Dsb                                               | -1.123538 | 0.019613 | Polysaccharide/Bacteria                          | Actinobacteria                                                                     | Actinobacteria bacterium                               |
| 1288.6    | Defense and invasion systems                        | Defensin and/or insectivore                         | Allyl hydroperoxide reductase E                                     | -1.123538 | 0.019613 | Polysaccharide/No taxonomic_annotation_available |                                                                                    |                                                        |
| 70241.6   | Carbohydrate metabolism                             | Chaperone and folding catalysis                     | Bacterioferritin                                                    | -1.143246 | 0.041167 | Polysaccharide/No taxonomic_annotation_available |                                                                                    |                                                        |
| 77090.1   | Carbohydrate metabolism                             | Biopolymer metabolism                               | 3-ketolactyl-CoA thioesterase                                       | -1.146149 | 0.008707 | Polysaccharide/No taxonomic_annotation_available |                                                                                    |                                                        |
| 170141.2  | Fatty acid and lipid metabolism                     | Biopolymer metabolism                               | Fatty acid oxidation complex subunit alpha                          | -1.161291 | 0.011299 | Polysaccharide/No taxonomic_annotation_available |                                                                                    |                                                        |
| 168129.1  | No roles mapped out of 4 IDs                        |                                                     | Not in Unifast                                                      | -1.161291 | 0.011299 | Polysaccharide/No taxonomic_annotation_available |                                                                                    |                                                        |
| 90218.20  | No roles mapped out of 4 IDs                        |                                                     | Prothymine II formyltransferase 2                                   | -1.167209 | 0.008047 | Polysaccharide/No taxonomic_annotation_available |                                                                                    |                                                        |
| 103008.0  | No roles mapped out of 4 IDs                        |                                                     | PAO3                                                                | -1.172327 | 0.002000 | Polysaccharide/No taxonomic_annotation_available |                                                                                    |                                                        |
| 170287.2  | Energy metabolism                                   | Oxidative phosphorylation                           | Cytochrome c oxidase, hcb-type, subunit 1                           | -1.187192 | 0.027676 | Polysaccharide/No taxonomic_annotation_available |                                                                                    |                                                        |
| 102158.2  | Nucleic acid metabolism                             | Purine metabolism                                   | Sensor protein PhoQ                                                 | -1.197366 | 0.006207 | Polysaccharide/No taxonomic_annotation_available |                                                                                    |                                                        |
| 24744.8   | No roles mapped out of 4 IDs                        |                                                     | Sulfite adenylyltransferase subunit 2                               | -1.204865 | 0.012110 | Polysaccharide/No taxonomic_annotation_available |                                                                                    |                                                        |
| 52051.9   | Energy metabolism                                   | Oxidative phosphorylation                           | NADH-quinone oxidoreductase subunit A                               | -1.204865 | 0.012110 | Polysaccharide/No taxonomic_annotation_available |                                                                                    |                                                        |
| 102158.2  | Intracellular trafficking, assembly, and processing | Chaperone and folding catalysis                     | Chaperone protein Hsp60                                             | -1.212278 | 0.002713 | Polysaccharide/Bacteria                          | Chloroflexi                                                                        | Chloroflexi bacterium                                  |
