# Supplementary material
Source: PubMed Central journal article supplement (PMC7343995)

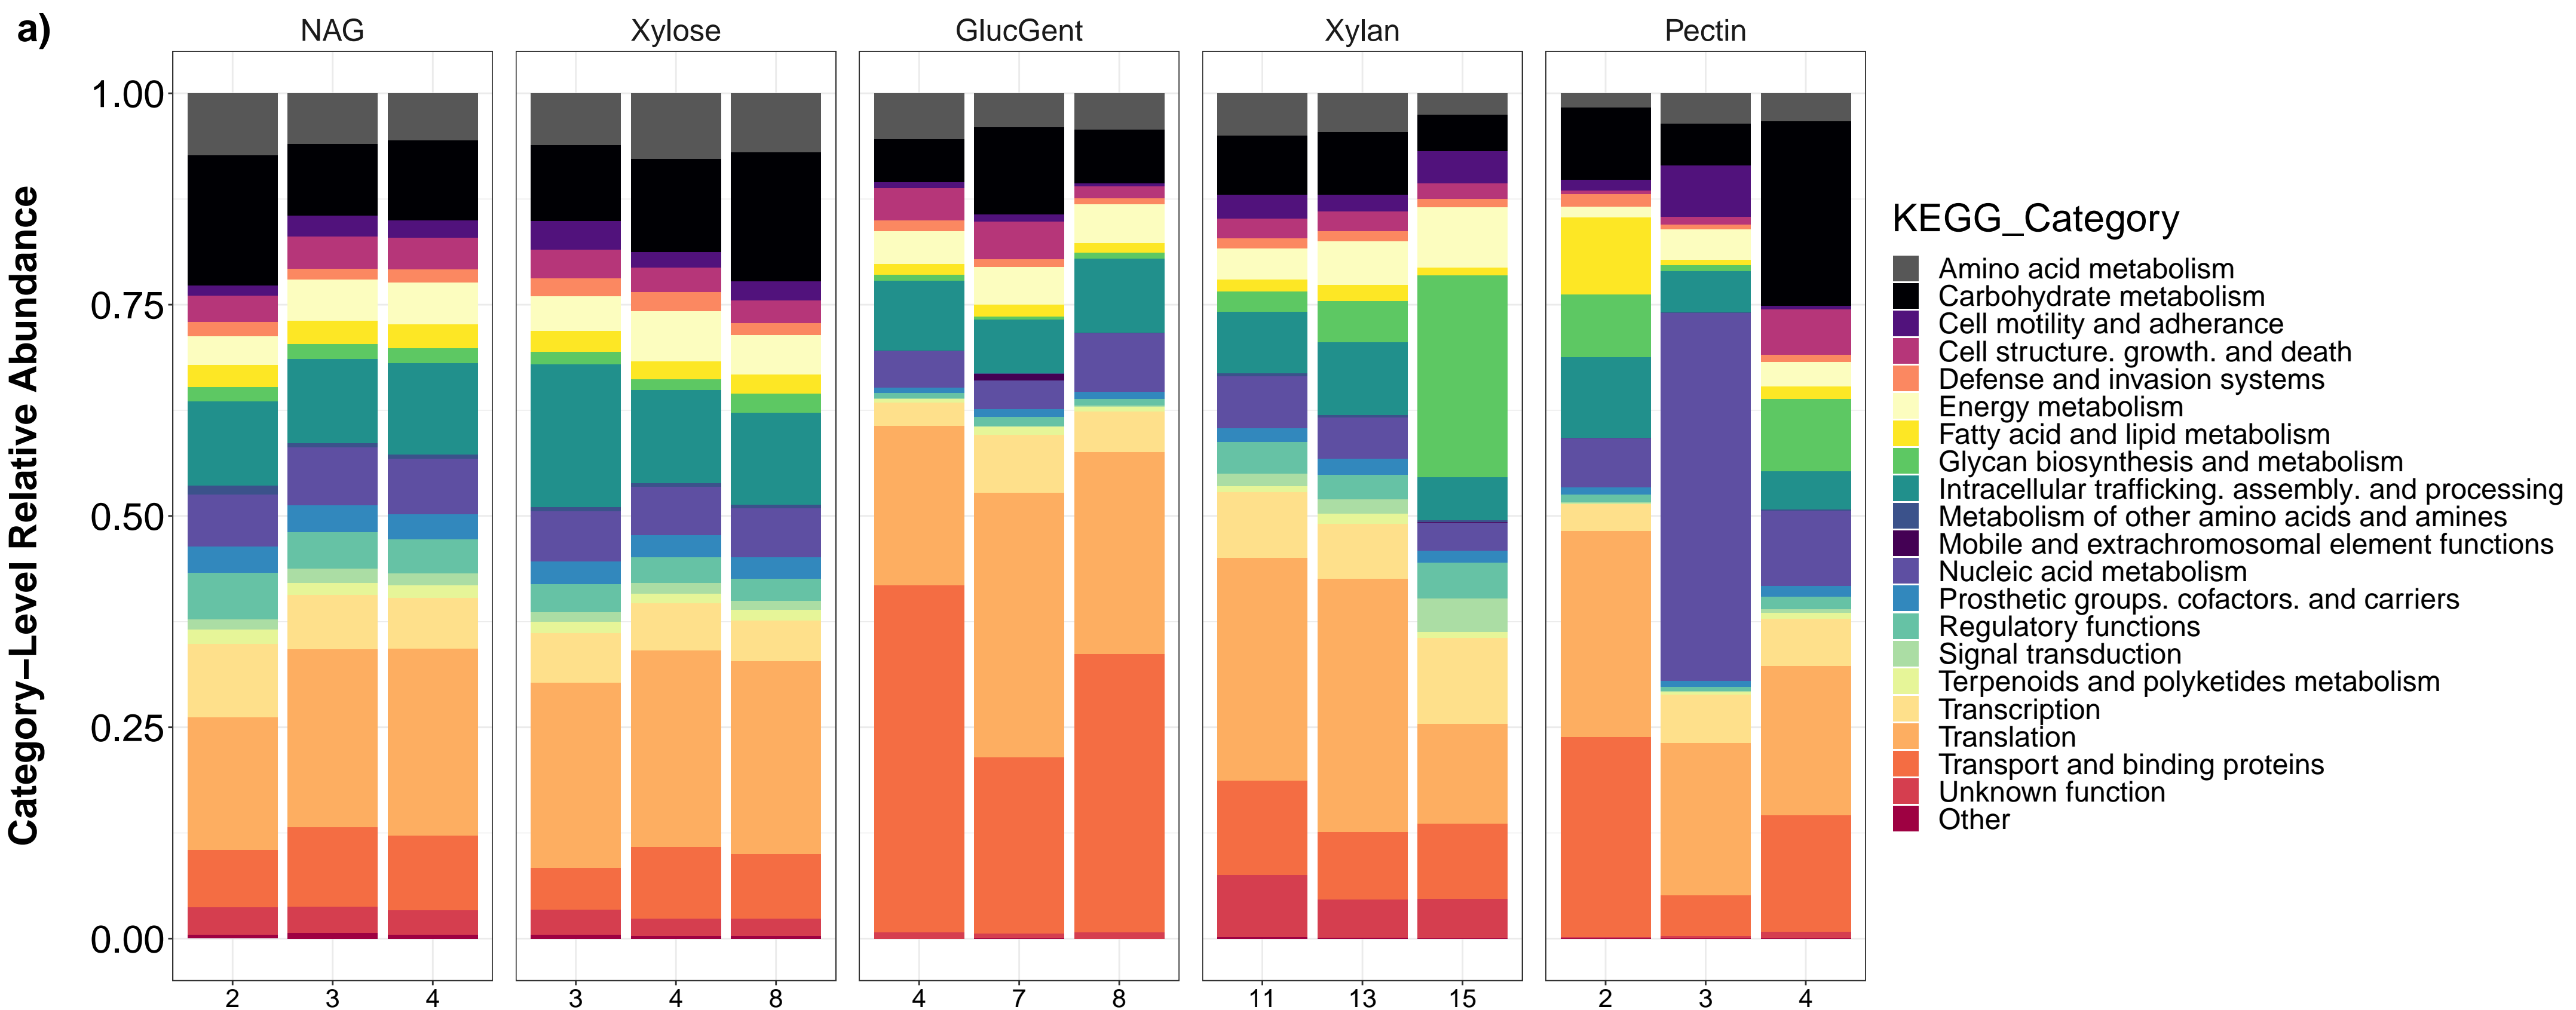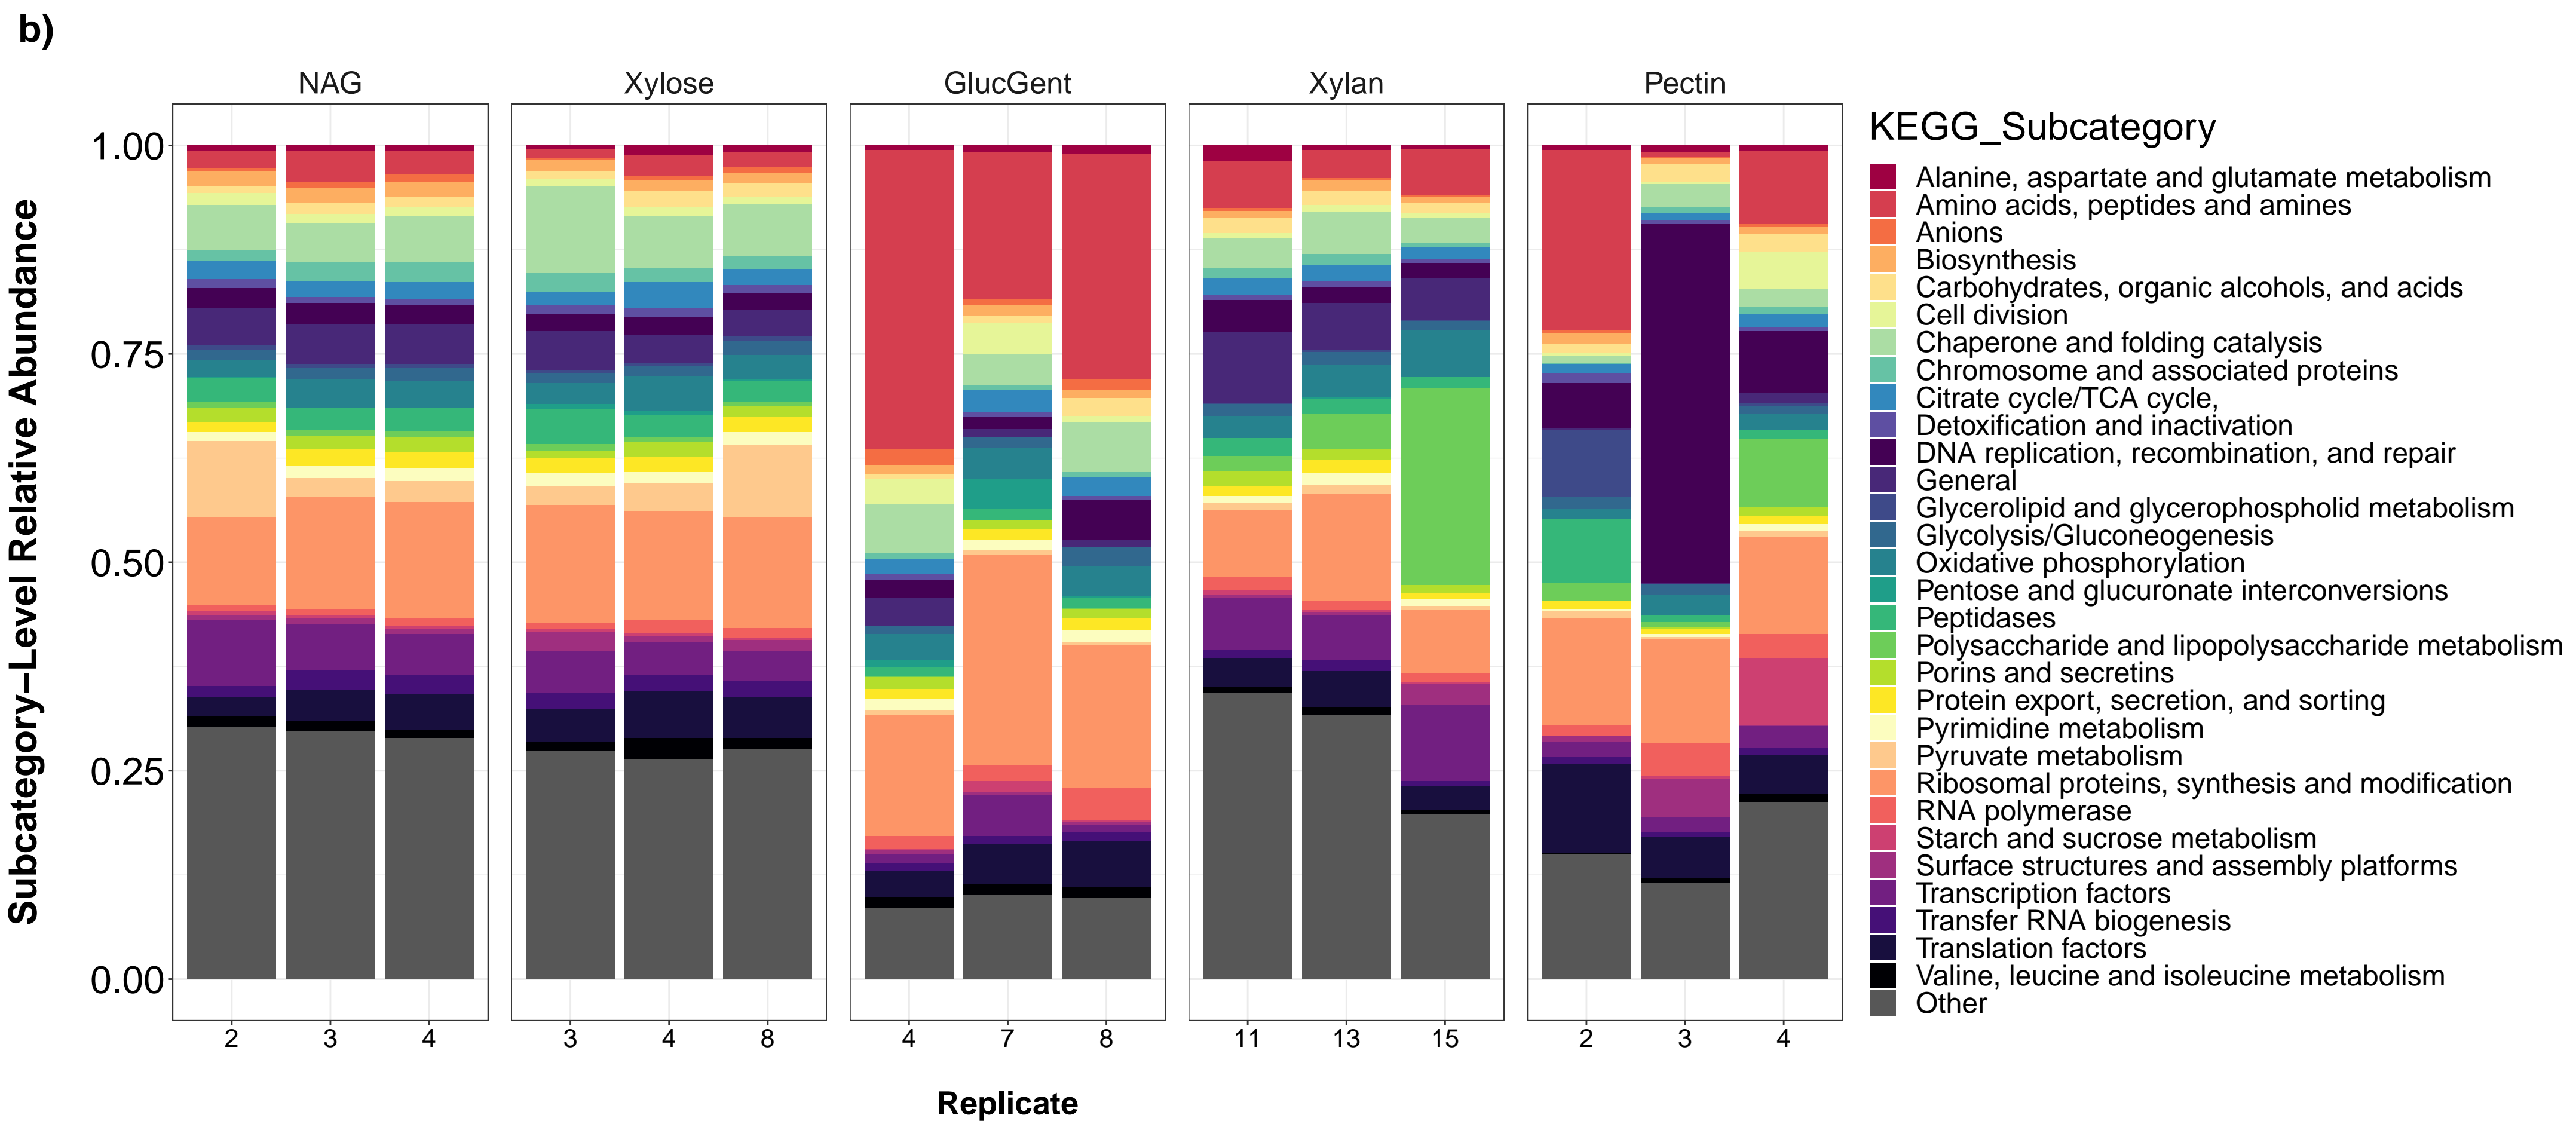

Supplement: mBio.01349-20-sf002.pdf [file mBio.01349-20-sf002.pdf]
